# Supplementary material for: A systematic CRISPR screen reveals an IL-20/IL20RA-mediated immune crosstalk to prevent the ovarian cancer metastasis
Source: eLife. 2021 Jun 11;10:e66222. doi: 10.7554/eLife.66222 (PMC8195602; doi:10.7554/eLife.66222)
Supplement: Figure 1—source data 1. [file elife-66222-fig1-data1.xlsx]

## Sheet: Figure 1B
Figure 1B
gene	pval	padj	ES	NES	nMoreExtreme	size	leadingEdge
IL20RA	0.0335052	0.966939	-0.706917	-1.64175	142	6	CACCTACCTGCCCGTCCCCA,ACATGAAGAATGTCCTACAA,AGACACGTTATACTTCAGAT,AGCACAAATTGGCCCACCAG
TEX14	0.0192264	0.966939	-0.888225	-1.60833	84	3	CCCTCTCATCGTGGAGTCGC,TAGGAAATTCGTTGATGTTC,ACCTGCGACTCCACGATGAG
hsa-mir-6738	0.00043535	0.663142	-0.995734	-1.56902	1	2	TCTGCCTGCATTCTACTCCC,GGGAGTAGAATGCAGGCAGA
TMEM56	0.00282978	0.964931	-0.977108	-1.53967	12	2	GTACAAGGTAGTATGCATAC,GTATGCATACTACCTTGTAC
TMEM56-RWDD3	0.00282978	0.964931	-0.977108	-1.53967	12	2	GTACAAGGTAGTATGCATAC,GTATGCATACTACCTTGTAC
hsa-mir-514a-2	0.00522421	0.964931	-0.969979	-1.52844	23	2	ATCCTTAAACATGTTGTCTG
hsa-mir-514a-3	0.00522421	0.964931	-0.969979	-1.52844	23	2	ATCCTTAAACATGTTGTCTG
hsa-mir-517b	0.00522421	0.964931	-0.969757	-1.52809	23	2	TCATGCTGTGACCCTCTAGA
CRYL1	0.00718328	0.966939	-0.964932	-1.52049	32	2	GTGCCCCATGCGAGTCCAGA
MITD1	0.00936003	0.966939	-0.959268	-1.51156	42	2	TTCCGCTCTGTCCATGTATT
ADAMTS4	0.00936003	0.966939	-0.958766	-1.51077	42	2	AGTCTCCACTTGCGACACGC,CATACCCAGCGTGTCGCAAG
ZBTB26	0.0115368	0.966939	-0.954927	-1.50472	52	2	AATATTCGAGGTGTAGACAA,TTGTCTACACCTCGAATATT
RPS6KA6	0.0134959	0.966939	-0.950661	-1.498	61	2	TGGGCAGCTCTATGCAATGA,CCCTATTACTCATCATGTTA
HTR1E	0.0202438	0.966939	-0.942983	-1.4859	92	2	CGCTGATGATCCTTACCGTC,GACGGTAAGGATCATCAGCG
MVB12B	0.0224205	0.966939	-0.940778	-1.48243	102	2	CTCACTTAACTGTTCCCCGC
FMO3	0.0267741	0.966939	-0.933232	-1.47054	122	2	CAGTTGACCTCCAGTCCCGC
NPAS3	0.0333043	0.966939	-0.924072	-1.4561	152	2	GTCTTTGACTATGTCCACCC,AAAGTGTTACCGTTCTCGCC
GOLM1	0.0333043	0.966939	-0.923788	-1.45565	152	2	GCCTGCCGTAATTCCTCTGC,CCTTCATCTGATTGATGCAC
hsa-mir-3669	0.0346104	0.966939	-0.922082	-1.45297	158	2	ATATATACGGAATATGTATA,ATATACGGAATATATATATA
hsa-mir-6886	0.0346104	0.966939	-0.921939	-1.45274	158	2	GGAGCCCTCATCTCACCTGC,GCAGGTGAGATGAGGGCTCC
COMMD3	0.0352634	0.966939	-0.920802	-1.45095	161	2	AGCTGCAACTTACATACTAG,GAATTCCCTAGAAATCCTAC
COMMD3-BMI1	0.0352634	0.966939	-0.920802	-1.45095	161	2	AGCTGCAACTTACATACTAG,GAATTCCCTAGAAATCCTAC
HOXD12	0.0424467	0.966939	-0.913977	-1.44019	194	2	TAAGTTCTATGCGCCCGAAG,CAGAGGAGCGCGGTCGTACC
NEU4	0.0454941	0.966939	-0.909354	-1.43291	208	2	TCGAAGAGCACTGTCCGTGA
CSF3	0.0472355	0.966939	-0.907134	-1.42941	216	2	ACTCGGGGGAGATCCCTTCC
GNPDA1	0.04963	0.966939	-0.903313	-1.42339	227	2	TGGGAATGCAGTCGACCTAC,TCCATCGAAGAACCTAGCAT
hsa-mir-134	0.0533304	0.966939	-0.898621	-1.416	244	2	CACCGTCCAGGGTGTGTGAC,CATGCACTGTGTTCACCCTG
OXSR1	0.0544188	0.966939	-0.897542	-1.4143	249	2	TAGCAATGGTAGATTCATCT
ATF7IP2	0.067044	0.966939	-0.887104	-1.39785	307	2	CAGCTTTCGAATGTGACTCC,ACTCACCATAACTTCAGCAT
NVL	0.0696561	0.966939	-0.884686	-1.39404	319	2	CTGGGCGTCGTGCCCCCTCG,GCTCATACACATGCGTCACC
RAB40AL	0.076404	0.966939	-0.880279	-1.38709	350	2	TCTTGTAGTCGATTCCCCCC,CGAGTCCCCGTACAGTCACC
SLC43A1	0.0768394	0.966939	-0.879852	-1.38642	352	2	CCGTGAGTGAAGTGAACGTT,CCTAACGTTCACTTCACTCA
CCDC9	0.0824989	0.966939	-0.872885	-1.37544	378	2	GCTAGGGCACCTGGTAGCGC,CCGAGTATGAGCGCAACCAG
ITK	0.0872878	0.966939	-0.868904	-1.36917	400	2	CCACTATAAATACCCGTTTC,CGCTGCCGGCTCTCACGATC
MASP2	0.0894645	0.966939	-0.867197	-1.36648	410	2	TGACGAAGTCGTACTCGCAG,CTGCGAGTACGACTTCGTCA
KLK6	0.133906	0.966939	-0.754099	-1.36547	591	3	GGACATCATGCTGTTGCGCC
MCM9	0.0966478	0.966939	-0.863768	-1.36108	443	2	GACAGTGATTCGAACAAGTC
CRYBB3	0.0988246	0.966939	-0.861628	-1.35771	453	2	CGAGTGTCCGTGCCATCAAC
hsa-mir-3141	0.100784	0.966939	-0.86023	-1.3555	462	2	CCTCCTCCACCCGCCCTCAC,CCCAGTGAAGGCTGATGGTG
NAP1L2	0.101437	0.966939	-0.859235	-1.35393	465	2	ACTGCGATTGAGTATTCCAC,CTCAATCGCAGTTCCCCTAT
CD1E	0.10209	0.966939	-0.858734	-1.35315	468	2	TTTGACTGTGATAGTTACCC
TP73	0.102525	0.966939	-0.858524	-1.35281	470	2	TCAAACGTGGTGCCCCCATC,AGGCCGCGCGGCTGCTCATC
NAT6	0.102743	0.966939	-0.858336	-1.35252	471	2	GCTGGTTCAGCACCCGTGAC
NTN1	0.104049	0.966939	-0.857387	-1.35102	477	2	ACCCGTCACGCCGTCCTTGC,TATCGGCCACGATGCCGCTC
CHRNA10	0.105355	0.966939	-0.856533	-1.34968	483	2	GGACAGATGCCTACCTACGA,ACTGTCCCAGATCATCGACA
DLK1	0.107749	0.966939	-0.853974	-1.34565	494	2	CATCCTCGCAGAATCCATTT,AGTGCATTTGCACCGACGGC
SPANXC	0.109055	0.966939	-0.852981	-1.34408	500	2	TACCGTCTCATTCACCTCGT
DHRS1	0.109273	0.966939	-0.852836	-1.34385	501	2	ATATCAACAACGTCGGACTC
PSMA1	0.113191	0.966939	-0.8499	-1.33923	519	2	ATGACAATGATGTCACTGTT
ANKRD35	0.120157	0.966939	-0.845585	-1.33243	551	2	TCACATTATCCAACACGTCC,CACCCAGCGATGCGATCATC
CDON	0.122333	0.966939	-0.8439	-1.32977	561	2	CTGAGGTGCGCTATAAAATC
COL2A1	0.00020141	0.663142	-1	-1.32718	0	1	CGGTGAGCCATGATTCGCCT
SERTM1	0.00040282	0.663142	-0.999858	-1.32699	1	1	CATAGATGTAGACGTTTGAC
hsa-mir-4443	0.00040282	0.663142	-0.999716	-1.3268	1	1	GCTCAGGGCTAGAAAGGGAT
PPP1R21	0.00060423	0.663142	-0.999574	-1.32661	2	1	TGAGACCGTCAACCACAGCT
ZDHHC15	0.00140987	0.943917	-0.999289	-1.32624	6	1	CTACCGGTTTACACAAGAAC
ZNF506	0.00181269	0.964931	-0.999147	-1.32605	8	1	TCATGCCTCTTCATAGTTAA
FYN	0.00181269	0.964931	-0.999005	-1.32586	8	1	TCCGTGCTTCATAGTCATAA
ITPK1	0.00261833	0.964931	-0.998721	-1.32548	12	1	CCTCACAGCTGAACCTTAGC
ZNF646	0.00302115	0.964931	-0.998578	-1.32529	14	1	GCTCGCCGAAGTGCAGACAT
STX8	0.00322256	0.964931	-0.998436	-1.3251	15	1	TTGACAAGTAGAATCGTATG
RFTN2	0.00382679	0.964931	-0.998152	-1.32473	18	1	TGCAAGTTACCTATACAGAG
MAP1S	0.00382679	0.964931	-0.99801	-1.32454	18	1	CAACCTTGATGAACAGCTCA
TTC14	0.00382679	0.964931	-0.997868	-1.32435	18	1	TATCACCACGCTCAATATCT
SAMD5	0.126252	0.966939	-0.84034	-1.32416	579	2	TACTCTAGGATGCCAGCCAT
hsa-mir-3689d-1	0.00483384	0.964931	-0.997725	-1.32416	23	1	GGTGTGCTATCGTCTTCCCC
DUSP11	0.00503525	0.964931	-0.997583	-1.32397	24	1	AAATTCAAACACGCTGTTAA
SPPL3	0.127122	0.966939	-0.840165	-1.32389	583	2	TGGCGGAGCAGACCTACTCG
hsa-mir-4251	0.00543807	0.964931	-0.997299	-1.3236	26	1	TTCTCAGGAATTGGCCACTA
ERVMER34-1	0.00543807	0.964931	-0.997157	-1.32341	26	1	GACACGCCGCTACTTTGTAG
MRPL48	0.00664653	0.966939	-0.99673	-1.32284	32	1	GACTGCATATGATATGACCC
H3F3C	0.00725076	0.966939	-0.996588	-1.32265	35	1	AGCCTCCTGCAGCGCACCGA
SLC35F6	0.00785498	0.966939	-0.996304	-1.32227	38	1	GCTGACTGTCGTGCTTGCTC
GPATCH2L	0.0082578	0.966939	-0.996162	-1.32209	40	1	GCCATATCATTAGTGACCCT
EFCAB9	0.00845921	0.966939	-0.996019	-1.3219	41	1	AGTTTATGTATCGTCATTCC
AGXT	0.00886203	0.966939	-0.995877	-1.32171	43	1	TATGCGCTCCCCGATGTCCA
HINT3	0.129299	0.966939	-0.83876	-1.32167	593	2	AGATAATGATGAGTTGCTGC,ACTCACTGTGATAAACCAAT
ZNF835	0.00946626	0.966939	-0.995735	-1.32152	46	1	ACTCTTGAGCGTCGCCCTCC
PNMA6A	0.00986908	0.966939	-0.995451	-1.32114	48	1	TTCCTCAGTGCTTCATCCAG
PNMA6C	0.00986908	0.966939	-0.995451	-1.32114	48	1	TTCCTCAGTGCTTCATCCAG
hsa-mir-575	0.0100705	0.966939	-0.995166	-1.32076	49	1	TGTGTATGGCCAGAGTTGAG
MARVELD2	0.0104733	0.966939	-0.995024	-1.32058	51	1	TGACACTCACGCCACATAGT
SDHB	0.011279	0.966939	-0.99474	-1.3202	55	1	TCGCCCTCTCCTTGAGGCGC
KRT12	0.011279	0.966939	-0.994598	-1.32001	55	1	GTCGGTGACCTCGCTCTTGC
ACTL7A	0.0120846	0.966939	-0.994456	-1.31982	59	1	TACGATCCGCTACGTGCTGC
GNA11	0.0120846	0.966939	-0.994313	-1.31963	59	1	ACTGACGTACTGATGCTCGA
SUFU	0.012286	0.966939	-0.994171	-1.31944	60	1	GCACGATACGTGTTCCAGTC
FAM183A	0.131694	0.966939	-0.837338	-1.31943	604	2	ACCCAGAACGCCATGACCGC,TTCTAGTTCATACAGTCACC
PABPC5	0.0124874	0.966939	-0.994029	-1.31926	61	1	GTCATCGCATACGACTTTGC
KIF5A	0.0124874	0.966939	-0.993887	-1.31907	61	1	TGAACGCTTTGTGTCCAGCC
ZNF708	0.0136959	0.966939	-0.993745	-1.31888	67	1	CTCAACTCTTACTTATCATA
FAM203A	0.0138973	0.966939	-0.993603	-1.31869	68	1	CACCCCGCCCCTGCGTACAG
BPI	0.0147029	0.966939	-0.993176	-1.31812	72	1	TTAAAGCTGTCTGAGTAGTC
CMTR2	0.0149043	0.966939	-0.993034	-1.31793	73	1	GAACATGGTGTATATCATCC
GDF2	0.01571	0.966939	-0.99275	-1.31756	77	1	TGCACGATAGCGTGTTTCGT
ITIH1	0.0161128	0.966939	-0.992607	-1.31737	79	1	CTGTCGATGGCGTGTTCATC
hsa-mir-1193	0.0161128	0.966939	-0.992465	-1.31718	79	1	GTGCACTTCATTTACGATGT
VAMP3	0.134306	0.966939	-0.835856	-1.3171	616	2	AAGTCTTCGATTACTGCCAG
SETD8	0.0169184	0.966939	-0.992039	-1.31661	83	1	GCCTGCTTACCCCGTCGGTG
STK32B	0.0169184	0.966939	-0.991897	-1.31643	83	1	ACACTCACCACAGATTGACC
NEDD4L	0.0173212	0.966939	-0.991754	-1.31624	85	1	GAAACTTTCATTGTACGTAG
PAK1	0.0175227	0.966939	-0.991612	-1.31605	86	1	GAAAAACCCGCAGGCTGTTC
SLC4A1	0.0179255	0.966939	-0.99147	-1.31586	88	1	TGATGTGGTGTGGTAGTCTG
LRRC17	0.135612	0.966939	-0.835063	-1.31585	622	2	CCGGTCAAACGCTACGCACC,CCTGGTGCGTAGCGTTTGAC
TNFRSF9	0.0179255	0.966939	-0.991328	-1.31567	88	1	CATAGTAGCCACTCTGTTGC
GLYATL3	0.135829	0.966939	-0.83491	-1.3156	623	2	TAGACGCCGTGTTGTCATCC
NonTargetingControlGuideForHuman_0802	0.0181269	0.966939	-0.991186	-1.31548	89	1	CTTAAGGCGAGAAAAATTAG
ADD3	0.135829	0.966939	-0.834814	-1.31545	623	2	ACAAGTCTACAAGTCTGTAC
FGD4	0.0191339	0.966939	-0.991044	-1.31529	94	1	GCACCATTCCTTAAGATGTA
KARS	0.0199396	0.966939	-0.990901	-1.3151	98	1	AAGGTATCGCCAGAGATACT
ALDH1A1	0.0199396	0.966939	-0.990759	-1.31492	98	1	GTATAATAGTCGCCCCCTCT
CEP170	0.136265	0.966939	-0.834352	-1.31473	625	2	GCAGTGGAGGCACTCGCCAC,TTCCTTTCAGTCTCGTAGTG
FAM209A	0.0199396	0.966939	-0.990475	-1.31454	98	1	CTCCACCTCGAGTTCCATTA
hsa-mir-639	0.020141	0.966939	-0.990333	-1.31435	99	1	CTCGTGCCCTGATTGGCCGA
RAB8B	0.0205438	0.966939	-0.990191	-1.31416	101	1	CATTCTTTCGACATCGGAAG
MSRB2	0.0205438	0.966939	-0.990048	-1.31397	101	1	CTTGTGACGTAGAACTGCTC
NonTargetingControlGuideForHuman_0855	0.0205438	0.966939	-0.989906	-1.31378	101	1	TGACACATTGGCTGGGTGTT
USP45	0.138224	0.966939	-0.833641	-1.31361	634	2	GACTCTTCAGATGATATTGC,TGATAGCATGACTTACATGT
SKAP2	0.0217523	0.966939	-0.98948	-1.31322	107	1	TCCTGATAAACGTATATATC
GPX8	0.0221551	0.966939	-0.989195	-1.31284	109	1	CGATTCTCCAAACTGATTGC
HSD17B3	0.0227593	0.966939	-0.989053	-1.31265	112	1	AGAATCTCACGCACTTCGCC
hsa-mir-3664	0.139312	0.966939	-0.83293	-1.31249	639	2	AGAGTTCCCTACCTTCAATG,ACCTTCCAACACGAGCTCTC
TSTD3	0.0229607	0.966939	-0.988911	-1.31246	113	1	CATGGTACATTGATAGACTC
PPP1R13L	0.0237664	0.966939	-0.988342	-1.31171	117	1	TCTTCTCGTACGCCACGTCC
RASSF7	0.0237664	0.966939	-0.9882	-1.31152	117	1	TGGCCGCACTTAGTGCCTGC
ALDH3B1	0.0247734	0.966939	-0.988058	-1.31133	122	1	CTATCCGCTGAACCTGACGC
DTWD1	0.0249748	0.966939	-0.987916	-1.31114	123	1	TTCTTACTAACCTTCACAAG
ZNF324B	0.0249748	0.966939	-0.987774	-1.31095	123	1	TTAGGACCTGATGACCTTCG
MTRF1L	0.0251762	0.966939	-0.987632	-1.31076	124	1	TATGCCTTACCTCAGTAGGC
FAM65C	0.0251762	0.966939	-0.987489	-1.31058	124	1	CCGCAGCGTGCCGTACATCT
LPCAT1	0.0255791	0.966939	-0.987347	-1.31039	126	1	TCTGACCGGGACACGAACAC
CKAP5	0.0255791	0.966939	-0.987205	-1.3102	126	1	TTTCCTCAGTGTCTCTATAC
hsa-mir-6779	0.0255791	0.966939	-0.987063	-1.31001	126	1	CTTCTCGGGAGCTCTGGGAG
TRIM47	0.0259819	0.966939	-0.986921	-1.30982	128	1	CCGTGGCCTGCGTCAACCAG
STK38L	0.0261833	0.966939	-0.986494	-1.30926	129	1	AAAGTCATCCAAGCCAAGTC
MYEOV2	0.0265861	0.966939	-0.98621	-1.30888	131	1	CTTACCTCTTCCGACACCAC
SLC20A2	0.0265861	0.966939	-0.986068	-1.30869	131	1	ATCTTACCGTATGCAGCCCG
TAF2	0.0277946	0.966939	-0.985783	-1.30831	137	1	TGCCATACTTCCCTCTACAC
ZDHHC24	0.0281974	0.966939	-0.985641	-1.30812	139	1	GCCGCGTCTGCATCCTGCGT
NonTargetingControlGuideForHuman_0220	0.0281974	0.966939	-0.985499	-1.30793	139	1	CGGCACACCAATGCGTTCGT
TBCA	0.0283988	0.966939	-0.985357	-1.30775	140	1	TCATCATCCTGGATTCTTGT
BRDT	0.029003	0.966939	-0.985215	-1.30756	143	1	TTGGGCCGCAGTTTGTGAAC
DAAM2	0.029003	0.966939	-0.985073	-1.30737	143	1	CCGCAGCCATGGAATTGATG
TRIML1	0.0292044	0.966939	-0.98493	-1.30718	144	1	GAAAGCCGAGCTTTGACTTG
IPO8	0.0294058	0.966939	-0.984788	-1.30699	145	1	TCTTCCGAACTATTATCGAC
VASH1	0.0296073	0.966939	-0.984646	-1.3068	146	1	TCTGCACCTAGATTGGCAAA
hsa-mir-7111	0.0300101	0.966939	-0.984504	-1.30661	148	1	ATCCTCTCTTCCCTCCTCCC
CTDSP2	0.0308157	0.966939	-0.984077	-1.30605	152	1	AGTCACGTACCTGGTAGAAC
hsa-mir-376b	0.0312185	0.966939	-0.983935	-1.30586	154	1	CACGTTTTAAATACCAAAGA
LRRC66	0.0314199	0.966939	-0.983793	-1.30567	155	1	CGTTTGAATACGCGTTGTCC
ERCC2	0.0314199	0.966939	-0.983651	-1.30548	155	1	TTATCGGCAGGCATATCCGC
MGEA5	0.0316213	0.966939	-0.983509	-1.30529	156	1	GTCCAATTTACGTTTCAATG
PRDX6	0.0322256	0.966939	-0.983367	-1.3051	159	1	CCTACCACACGAGCTGTCAC
METTL6	0.032427	0.966939	-0.983224	-1.30492	160	1	AGTGTCTTGTTTCGTGACTA
RRP7A	0.0326284	0.966939	-0.983082	-1.30473	161	1	AACTTCGACCTTGACTCCTT
PEPD	0.033434	0.966939	-0.982656	-1.30416	165	1	AGCCACTTACCAAAGTGAGG
RFPL4B	0.0336354	0.966939	-0.982514	-1.30397	166	1	AAGCCCTCGCCTTCGCCGTG
OR4M1	0.0338369	0.966939	-0.982371	-1.30378	167	1	GCCTGAATGTTTCTTGAGCA
YME1L1	0.0352467	0.966939	-0.982087	-1.30341	174	1	TACCCCTTTAACATGTTCAA
SOCS5	0.0356495	0.966939	-0.981945	-1.30322	176	1	TTCAAAAAACATGCACGAAC
BICC1	0.035851	0.966939	-0.981803	-1.30303	177	1	TCTTATAGATCCCCATATTA
TNFSF8	0.0362538	0.966939	-0.981518	-1.30265	179	1	TGTATCCACATTGACTGATA
TYW1B	0.0374622	0.966939	-0.981376	-1.30246	185	1	TGCTGAAGCAGTTACGTCCC
ANXA8L2	0.0374622	0.966939	-0.981234	-1.30227	185	1	AAGTGAAAGAGATGGCCTGG
FAM171B	0.0378651	0.966939	-0.981092	-1.30209	187	1	GTGCTTACTTGGCATTCTTC
hsa-mir-181d	0.0378651	0.966939	-0.98095	-1.3019	187	1	TCAACATTCATTGTTGTCGG
NADSYN1	0.0378651	0.966939	-0.980665	-1.30152	187	1	ACTCACCGACTCCTCGACCA
C1QBP	0.0382679	0.966939	-0.980523	-1.30133	189	1	ATCCTGCATACCTCATCCTC
OMP	0.151937	0.985979	-0.825821	-1.30128	697	2	AGGCGGTACACAGACTCCGC,CACGCGTAGCCGCATCTGCC
ILF2	0.0382679	0.966939	-0.980239	-1.30095	189	1	TATCCCATTTGACTTCTATT
TMF1	0.0392749	0.966939	-0.979955	-1.30058	194	1	TTGAGTAAACTCATCTTTCA
MAP2K6	0.0392749	0.966939	-0.979812	-1.30039	194	1	TGGACAGTCCACCGTCCTCA
SOWAHB	0.0392749	0.966939	-0.97967	-1.3002	194	1	GCCGCCGACGCAGCTTGCAA
GDF5	0.0394763	0.966939	-0.979528	-1.30001	195	1	TCTAGATGACCGAGGTCCCG
C2orf15	0.040282	0.966939	-0.979386	-1.29982	199	1	TACTAAGTGAAAATCCCATT
EML5	0.0406848	0.966939	-0.979244	-1.29963	201	1	TACACATGGTATAGCTTGCT
LPXN	0.0406848	0.966939	-0.979102	-1.29944	201	1	CGTGTATACTACCAATATCC
FBXL14	0.0408862	0.966939	-0.978959	-1.29926	202	1	CGATCTCCTGCACAAACGCG
KIF11	0.0420947	0.966939	-0.978533	-1.29869	208	1	CACCTAATGAAGAGTATACC
TRIM31	0.0420947	0.966939	-0.978391	-1.2985	208	1	TTCTTGAGATCGTTCAACTG
SEPN1	0.0431017	0.966939	-0.978249	-1.29831	213	1	CGGTGGATAGAAGCGGTTGT
MED13	0.0431017	0.966939	-0.978106	-1.29812	213	1	ATACCTGTTTGGACTTCCTC
ALK	0.0431017	0.966939	-0.977964	-1.29793	213	1	AATGGGACAGTCCTCCAGCT
NDC80	0.0433031	0.966939	-0.977822	-1.29775	214	1	CTCACGTTTGAGGGGTATAG
PDE6B	0.0435045	0.966939	-0.97768	-1.29756	215	1	CGCGGCGCGTCTCGCAGTTG
SMTNL2	0.15542	0.987878	-0.823404	-1.29747	713	2	TGCGACGCTCCCCCTGCCGA,AGAAGAATTCCTCTTTCACG
WNT16	0.0439074	0.966939	-0.977396	-1.29718	217	1	TGCTCCGATGATGTCCAGTA
RNF14	0.15542	0.987878	-0.823106	-1.29701	713	2	GCCCTGGCAAGTATTTACGA
FOSB	0.0443102	0.966939	-0.977253	-1.29699	219	1	CCGTAGGAGTGCGCCGGTCT
hsa-mir-643	0.0445116	0.966939	-0.977111	-1.2968	220	1	TGAGCTAGAATACAAGTAGT
hsa-mir-301a	0.0449144	0.966939	-0.976827	-1.29642	222	1	ATTCGTTAGCAGTAATAAGT
CCNDBP1	0.0451158	0.966939	-0.976685	-1.29624	223	1	CATAATCCCATGCCTTGCGC
TCF7L2	0.0461229	0.966939	-0.9764	-1.29586	228	1	GGCACTTACGGTTCGGGCGG
BMPER	0.0465257	0.966939	-0.976258	-1.29567	230	1	ATGTGCTGCCCCACATGTCC
hsa-mir-4524a	0.0467271	0.966939	-0.975974	-1.29529	231	1	AAATAATTCTGCAGTGAGAC
hsa-mir-4524b	0.0467271	0.966939	-0.975974	-1.29529	231	1	AAATAATTCTGCAGTGAGAC
C9orf131	0.0469285	0.966939	-0.975832	-1.2951	232	1	GGTTGCGACAGCTTCATCCC
KRTAP13-4	0.0469285	0.966939	-0.97569	-1.29492	232	1	ATCTAGGTGCTGCTACTCGC
hsa-mir-6885	0.0473313	0.966939	-0.975547	-1.29473	234	1	CTTGCGCAGTGCCCCCCTCC
C17orf64	0.0477341	0.966939	-0.975405	-1.29454	236	1	CTCGCTCATGCGCCATGCCA
NonTargetingControlGuideForHuman_0794	0.0477341	0.966939	-0.975263	-1.29435	236	1	GTTTCGAAACTTGAAGTAAG
P4HTM	0.048137	0.966939	-0.975121	-1.29416	238	1	TTAGGTGGGGCACGAGCGTA
PAMR1	0.0485398	0.966939	-0.974979	-1.29397	240	1	ACGTGCGTCCTTGACAAGGC
CHRNA6	0.0495468	0.966939	-0.974837	-1.29378	245	1	AAACGTTTCCGACCCTGTCA
ENTPD8	0.0497482	0.966939	-0.974694	-1.29359	246	1	ACCCAGATCACGTTCGTGCC
RTN3	0.0501511	0.966939	-0.97441	-1.29322	248	1	ACCACCTACTGAGTACTCTA
FLT1	0.0507553	0.966939	-0.974268	-1.29303	251	1	TGGTCCTACCATACAACTTC
hsa-mir-1236	0.0507553	0.966939	-0.974126	-1.29284	251	1	GCTGGAGAGACAAGGGGAAG
ATP6AP1	0.0507553	0.966939	-0.973984	-1.29265	251	1	TGGTGCTTCCTGCCGTCGAC
hsa-mir-514a-1	0.160427	0.996173	-0.820233	-1.29248	736	2	ACAGACAACATGTTTAAGGA
DEFA1	0.0515609	0.966939	-0.973557	-1.29209	255	1	CATCCTTGCTGCCATTCTCC
DEFA1B	0.0515609	0.966939	-0.973557	-1.29209	255	1	CATCCTTGCTGCCATTCTCC
DEFA3	0.0515609	0.966939	-0.973557	-1.29209	255	1	CATCCTTGCTGCCATTCTCC
ASAP1	0.0517623	0.966939	-0.973415	-1.2919	256	1	TCACATTGTGGCTCAAACCC
hsa-mir-3662	0.0519637	0.966939	-0.973273	-1.29171	257	1	ACAAATCAGCCAAACTCTGT
TBC1D2B	0.161515	0.996173	-0.819707	-1.29165	741	2	ATCGTCAACTCATGACTTAC,GTAAGTCATGAGTTGACGAT
PTPN20A	0.0521652	0.966939	-0.973131	-1.29152	258	1	TTGTTCAGTAAACGATTATG
PTPN20B	0.0521652	0.966939	-0.973131	-1.29152	258	1	TTGTTCAGTAAACGATTATG
SCGB1D2	0.052568	0.966939	-0.972988	-1.29133	260	1	TTACCAGGACTTCCGCAATG
SLC3A1	0.0533736	0.966939	-0.972704	-1.29095	264	1	AAATATGTTTATCACTCGTG
TK1	0.0533736	0.966939	-0.972562	-1.29076	264	1	TGCCTATGACAGCCACGCCC
PSMD11	0.0541793	0.966939	-0.97242	-1.29058	268	1	CCCAGTGAAGCGTGACATTC
CPEB4	0.0543807	0.966939	-0.972278	-1.29039	269	1	TGTGTCTACAGGATCGCCCC
CCL28	0.0543807	0.966939	-0.972135	-1.2902	269	1	TGAAACCTCCGTGCAACAGC
RAPGEF3	0.163039	0.996173	-0.818611	-1.28992	748	2	TCTTCATCCGTGCGCTGACC
SLC7A5	0.0549849	0.966939	-0.971851	-1.28982	272	1	CGTGCCGTCCCTCGTGTTCA
USP7	0.0567976	0.966939	-0.971567	-1.28944	281	1	GCCACATTCCCATTGATCAC
hsa-mir-4508	0.056999	0.966939	-0.971425	-1.28926	282	1	TCTGCGGCCCTTGCAGCTGC
EXOSC7	0.056999	0.966939	-0.971282	-1.28907	282	1	TATTGTTAAATATCCGATAG
LAMP5	0.0572004	0.966939	-0.97114	-1.28888	283	1	CCTTACATCTACGTAGTTGC
DOPEY1	0.0578046	0.966939	-0.970998	-1.28869	286	1	AAGGATCAGAGTACTATGAG
KIF19	0.0588117	0.966939	-0.970856	-1.2885	291	1	CTGAGATGACGCCCTCGATG
C9orf72	0.0588117	0.966939	-0.970714	-1.28831	291	1	AATGGGGATCGCAGCACATA
TAF8	0.0590131	0.966939	-0.970572	-1.28812	292	1	GCCCACACTGTCCGATATCG
DIS3L2	0.0592145	0.966939	-0.970429	-1.28793	293	1	TCCATCCTACCGTCAGCGAG
MRPL27	0.0600201	0.966939	-0.970003	-1.28737	297	1	GGAGCTACCACCCGACTTCT
PPEF2	0.0602216	0.966939	-0.969719	-1.28699	298	1	CGTAGCGCCGGTACCATCTC
DENND3	0.0602216	0.966939	-0.969576	-1.2868	298	1	AATGTCCACGTTATCGTCCG
MLEC	0.060423	0.966939	-0.969434	-1.28661	299	1	TGTACCGCTCAGTTTGATAC
DBP	0.0610272	0.966939	-0.969292	-1.28642	302	1	ACGTACTCCACATCGCCGAA
TRAM1	0.0610272	0.966939	-0.969008	-1.28605	302	1	TGACTTACGTCATCAGGTTA
OR14J1	0.0626385	0.966939	-0.968581	-1.28548	310	1	TTCTGATTCCTCATCGACTG
ARNT	0.0630413	0.966939	-0.968439	-1.28529	312	1	GACATCAGATGTACCATCAC
MLLT10	0.0630413	0.966939	-0.968297	-1.2851	312	1	TTCTTACCAGCTTACTAAAA
ANAPC4	0.0634441	0.966939	-0.968155	-1.28492	314	1	CACTTCCATCCAATGCATAC
NOX4	0.0634441	0.966939	-0.968013	-1.28473	314	1	TCACTACCTCCACCAGATGT
SUV420H2	0.064854	0.966939	-0.967728	-1.28435	321	1	TCATGTACTCAACCCGCAAG
hsa-mir-608	0.064854	0.966939	-0.967586	-1.28416	321	1	TTCCATCAAAGGCTGCCTCT
SPATA9	0.0650554	0.966939	-0.967444	-1.28397	322	1	AATCGAGCAACATTAATTCG
SPECC1	0.168263	0.998953	-0.814731	-1.28381	772	2	CCCGATGCAGCGGTACTTCC,CGGCCCGAGGATCCGGAACC
INO80	0.0650554	0.966939	-0.967302	-1.28378	322	1	AATCCATTATTGCCCCAGTC
HOXB3	0.0654582	0.966939	-0.967017	-1.28341	324	1	TGGGGACGGGCTCTCGTAGC
SLFN12	0.0654582	0.966939	-0.966875	-1.28322	324	1	ACCGTGTGATGCAGTTGACC
MYOZ2	0.0660624	0.966939	-0.966591	-1.28284	327	1	ACAAGCCATTAGCAATGATC
WDR92	0.0660624	0.966939	-0.966449	-1.28265	327	1	AGATGATCCTGTTGCTAATA
FAM161A	0.0664653	0.966939	-0.966307	-1.28246	329	1	GTGAGTCATAAGCCTTAGCC
KHK	0.0668681	0.966939	-0.966164	-1.28227	331	1	GTACCAGGGCCGGAACGCAT
RRBP1	0.0676737	0.966939	-0.966022	-1.28209	335	1	GCTCCCGGCTGACCTCGTCC
ILK	0.0682779	0.966939	-0.965596	-1.28152	338	1	GGTCCAGCTATTGCAGTACA
SALL4	0.0682779	0.966939	-0.965454	-1.28133	338	1	TACACCACAGACTCCGCATC
PGAM1	0.0686808	0.966939	-0.965311	-1.28114	340	1	CGCCGCGCTTCGCCTCCTCG
ISLR	0.0688822	0.966939	-0.965169	-1.28095	341	1	CTTGAGCCACACGATGCCGC
PROK2	0.0690836	0.966939	-0.965027	-1.28076	342	1	GGACGCCGCCGTGATCACCG
PQLC2	0.0696878	0.966939	-0.964601	-1.2802	345	1	CTCACGTTGGTGCGGATCTG
ADSS	0.0696878	0.966939	-0.964316	-1.27982	345	1	TACAGTTGTTGTGGATTCTG
EDAR	0.070292	0.966939	-0.964032	-1.27944	348	1	GCAGCCGTAGTCCTCGTCTT
ARMS2	0.0708963	0.966939	-0.963748	-1.27907	351	1	ACCGATGGTAACTGAGGCGG
NonTargetingControlGuideForHuman_0088	0.0712991	0.966939	-0.963605	-1.27888	353	1	AAGGCGCGCGAATGTGGCAG
PDCD1LG2	0.0715005	0.966939	-0.963463	-1.27869	354	1	ACTGTCCTTCGTCCCTCACT
CECR6	0.0715005	0.966939	-0.963321	-1.2785	354	1	CCTCGTTCTCCGAGATGCAG
HSPA4L	0.0717019	0.966939	-0.963179	-1.27831	355	1	GATCCTTTCAGTTTGCACAA
NonTargetingControlGuideForHuman_0397	0.0721047	0.966939	-0.963037	-1.27812	357	1	TTGTACGGTACTGGCTTTGT
IMPDH2	0.0723061	0.966939	-0.962895	-1.27793	358	1	AATCACTCTTAAGACCCCAC
GJA3	0.0725076	0.966939	-0.962752	-1.27775	359	1	CGCAGGACAATCCCTCGTCG
KCNH6	0.072709	0.966939	-0.96261	-1.27756	360	1	ACTCTTCGGCTACTCCCGAG
PTCHD4	0.0733132	0.966939	-0.962326	-1.27718	363	1	ACCACACAGGTTTGCGATCC
PHKA1	0.0735146	0.966939	-0.962184	-1.27699	364	1	GAGTACCTGCTCCAATTCAT
VCL	0.073716	0.966939	-0.961899	-1.27661	365	1	CCAGGAGCACCGAGTGATGT
NPAS4	0.0739174	0.966939	-0.961757	-1.27642	366	1	TCTGCTTGTGTTCACAGCCG
CDC42BPG	0.0741188	0.966939	-0.961615	-1.27624	367	1	TCACCAGGTACTCCTCGTCT
KIR2DL3	0.0741188	0.966939	-0.961473	-1.27605	367	1	CCCTGCAAGGTCTTGCATCA
OR4P4	0.0747231	0.966939	-0.961331	-1.27586	370	1	CAGTAAGTCAACCATTAATT
hsa-mir-3690-1	0.0751259	0.966939	-0.961189	-1.27567	372	1	GCTGGGTCCAGGTGGAGATG
hsa-mir-3690-2	0.0751259	0.966939	-0.961189	-1.27567	372	1	GCTGGGTCCAGGTGGAGATG
PNP	0.0757301	0.966939	-0.961046	-1.27548	375	1	CGTGACCATATCAACCTACC
KAZALD1	0.177623	0.998953	-0.809327	-1.27529	815	2	GCGGTAAGTGCCCTCATCAC,GAGCGGACTCTGCGAACGAC
TYSND1	0.0759315	0.966939	-0.960904	-1.27529	376	1	ACAGTGGCGCTTCTCGAGCG
SLC11A2	0.0767372	0.966939	-0.960478	-1.27473	380	1	TGAGAAGATCTCCATTCCTG
C1QTNF6	0.178494	0.998953	-0.808901	-1.27462	819	2	CCTCAGAGTCACAGCACCGT,TGGCCTACGGGGACCGCGTC
PTGER2	0.0769386	0.966939	-0.960336	-1.27454	381	1	AGTAGGGGTGCCCGATCGAG
NKX3-1	0.0773414	0.966939	-0.960193	-1.27435	383	1	CTACCCATACCTGTACTGCG
CALB2	0.078147	0.966939	-0.959767	-1.27378	387	1	TGGCCTCACCTCCATAAACT
INTS7	0.078147	0.966939	-0.959625	-1.27359	387	1	TGATGAGCATTCTTCCTCTC
FER1L6	0.206288	0.999908	-0.703356	-1.27358	911	3	TCTCACCAGGAAGGACCGAG,GATTGCCATAACCATCACCG,AGGTGACACTGAAGCACTGC
hsa-mir-765	0.0783484	0.966939	-0.95934	-1.27322	388	1	ACTGGGGTTTCTGGAGGAGA
WBP2	0.0787513	0.966939	-0.958914	-1.27265	390	1	CATCCGCTGTCCGAACTCAA
hsa-mir-4310	0.0787513	0.966939	-0.958772	-1.27246	390	1	ATTCATGTCCCACCCCCACC
GSE1	0.0791541	0.966939	-0.958487	-1.27209	392	1	GCCCCCCAGTACCGTGACCG
FOXL2	0.0793555	0.966939	-0.958345	-1.2719	393	1	ATTGTACGAGTTCACTACGC
hsa-mir-892c	0.0799597	0.966939	-0.958203	-1.27171	396	1	AAGCCCTACTCCACTCAGAA
hsa-mir-3940	0.0801611	0.966939	-0.958061	-1.27152	397	1	AGTAACCAAGGTAAGTGGGC
C7	0.0801611	0.966939	-0.957919	-1.27133	397	1	GTCCTCACCTTGAAAAACTT
FAM71D	0.0807654	0.966939	-0.957777	-1.27114	400	1	ATCTTGCTTATTGATCCTCA
NonTargetingControlGuideForHuman_0790	0.0811682	0.966939	-0.957634	-1.27095	402	1	TCCTCACCTAAAGTGCAATA
CSF1R	0.081571	0.966939	-0.957492	-1.27076	404	1	GCCATTGCCCACACATCGCA
TIE1	0.081571	0.966939	-0.95735	-1.27058	404	1	CGCGCTACCTCTTCCGCATG
SLC52A2	0.0823766	0.966939	-0.957066	-1.2702	408	1	TGGCGTGTTCTCCTACGTGA
CHST8	0.18263	0.998953	-0.805915	-1.26992	838	2	GGCGGTCCTCCACGAAGATA,CCCCGGATGACCCTGCGACC
GPR160	0.18263	0.998953	-0.805887	-1.26987	838	2	GCTGGTTTGTTTGACGTAAC
MUC20	0.18263	0.998953	-0.805773	-1.26969	838	2	GCTGCAGCGGGCTGTTCGAC,GTCGAACAGCCCGCTGCAGC
NonTargetingControlGuideForHuman_0467	0.0829809	0.966939	-0.956497	-1.26944	411	1	TAGGAGCTGTATCTAGTGGC
DBF4	0.0829809	0.966939	-0.956355	-1.26925	411	1	TTTGATAATATACTATTTGA
ABHD8	0.0833837	0.966939	-0.956213	-1.26907	413	1	TGCCCTCGTCGATGAGCTTC
DLG5	0.0837865	0.966939	-0.955928	-1.26869	415	1	GGCCCGGTTCCGACAGCTGA
UBE2NL	0.0839879	0.966939	-0.955786	-1.2685	416	1	ATCAAAGGATTCCCCCTTTG
NonTargetingControlGuideForHuman_0863	0.0839879	0.966939	-0.955644	-1.26831	416	1	GCCTGGGTTTTGGTGCATAC
hsa-mir-520a	0.0843907	0.966939	-0.95536	-1.26793	418	1	TGCTTCCCTTTGGACTGTTT
LRRC8B	0.0847936	0.966939	-0.955218	-1.26775	420	1	ACAATCACTGTGCCGTGCCT
TRIM25	0.0855992	0.966939	-0.955075	-1.26756	424	1	AAAGCCAGTCTACATCCCCG
IER5L	0.086002	0.966939	-0.954933	-1.26737	426	1	TGCCCGGCGCCGCGTACGCT
MGAT4C	0.0866062	0.966939	-0.954649	-1.26699	429	1	AGACTTGCAGGGGGGTTATC
TUBB2A	0.0870091	0.966939	-0.954507	-1.2668	431	1	AACCTACTCCATTGATAACG
MYO9A	0.0872105	0.966939	-0.954222	-1.26642	432	1	ATGCTCCTGATAAACGAGTC
OLFM2	0.0872105	0.966939	-0.95408	-1.26624	432	1	CGCGATACGTCCGCAACTCA
U2AF1L4	0.0872105	0.966939	-0.953938	-1.26605	432	1	TGGCTGAACTCAGTAACCGC
FSCN3	0.0880161	0.966939	-0.953654	-1.26567	436	1	ACACGTTCTTCCGAATGCAC
TSPO2	0.0882175	0.966939	-0.953512	-1.26548	437	1	GACAGCCATCTACTCTGTCG
NEIL1	0.0882175	0.966939	-0.953369	-1.26529	437	1	GAATGTGCTACGAAACCTAG
PAPPA2	0.0886203	0.966939	-0.953227	-1.2651	439	1	CATGTGCCGTCCATCGTAAG
TTK	0.0888218	0.966939	-0.953085	-1.26492	440	1	AAGTAGTCACGTGCATCATC
ARHGAP35	0.089426	0.966939	-0.952943	-1.26473	443	1	TCTCCTCAGAAATCAACGAC
SLC30A9	0.0896274	0.966939	-0.952801	-1.26454	444	1	CAGAGAGAAAAAATTGCGTA
PSMB6	0.0898288	0.966939	-0.952659	-1.26435	445	1	CGATGATGATTCCCGCCATC
PDCD1	0.0906344	0.966939	-0.952374	-1.26397	449	1	TGACGTTACCTCGTGCGGCC
ELF4	0.0908359	0.966939	-0.952232	-1.26378	450	1	CGGGACCTTGTGCATGACGC
RFNG	0.0914401	0.966939	-0.95209	-1.26359	453	1	AGTGCGCACCGCCGAGCAGT
LEF1	0.0918429	0.966939	-0.951948	-1.26341	455	1	CCCTCCTACTCGAGTTATTC
SPATA31A1	0.0920443	0.966939	-0.951806	-1.26322	456	1	TTCCTTACCTTTCTCTTCCC
SPATA31A2	0.0920443	0.966939	-0.951806	-1.26322	456	1	TTCCTTACCTTTCTCTTCCC
SPATA31A3	0.0920443	0.966939	-0.951806	-1.26322	456	1	TTCCTTACCTTTCTCTTCCC
SPATA31A5	0.0920443	0.966939	-0.951806	-1.26322	456	1	TTCCTTACCTTTCTCTTCCC
SPATA31A7	0.0920443	0.966939	-0.951806	-1.26322	456	1	TTCCTTACCTTTCTCTTCCC
SPDYE1	0.0926485	0.966939	-0.951663	-1.26303	459	1	CCTACCAAGCAGCCTGTTGA
SPDYE3	0.0926485	0.966939	-0.951663	-1.26303	459	1	CCTACCAAGCAGCCTGTTGA
OR10J1	0.0930514	0.966939	-0.951521	-1.26284	461	1	TGTAGGTCACCGAGATCAGC
HTR5A	0.0930514	0.966939	-0.951379	-1.26265	461	1	TGTTGAAAGCCGTATAGATC
hsa-mir-105-2	0.0932528	0.966939	-0.951237	-1.26246	462	1	TGGTGGCTGCTTATGCACCA
MT3	0.0940584	0.966939	-0.950953	-1.26209	466	1	CACACTTCTCACACTCCGCA
POMK	0.0950655	0.966939	-0.950668	-1.26171	471	1	CACATGACCCGTGTGCCCAC
TSPYL2	0.0954683	0.966939	-0.950384	-1.26133	473	1	ACTTACCTGAGCGGTTGCGC
EFNA5	0.0956697	0.966939	-0.950242	-1.26114	474	1	TGGCTCGGCTGACTCATGTA
TEKT2	0.0958711	0.966939	-0.9501	-1.26095	475	1	ACTTGGCTTGACGCTCAGCG
hsa-mir-4661	0.0962739	0.966939	-0.949957	-1.26076	477	1	CTGATTTAGGTCTTTTACTC
hsa-mir-6131	0.0964753	0.966939	-0.949815	-1.26058	478	1	TTCCCTCTGCTTTGGTCAGG
OR4E2	0.0964753	0.966939	-0.949673	-1.26039	478	1	ACTCACTGATAACCGGGTGC
OR6A2	0.0966767	0.966939	-0.949531	-1.2602	479	1	TTATAGCGTCCAGCAGCCGA
LILRB4	0.097281	0.966939	-0.949389	-1.26001	482	1	CCGAGTCCTCTTGTGACCTC
MAPK1IP1L	0.097281	0.966939	-0.949247	-1.25982	482	1	TCTGGTGCTCCACCAATGCC
DNAJC12	0.0974824	0.966939	-0.949104	-1.25963	483	1	GTCGAGCCCGCTATGACCAC
hsa-mir-6511a-1	0.0976838	0.966939	-0.948962	-1.25944	484	1	GGGGCCTGCAGGCAGAAGTG
hsa-mir-6511a-2	0.0976838	0.966939	-0.948962	-1.25944	484	1	GGGGCCTGCAGGCAGAAGTG
hsa-mir-6511a-3	0.0976838	0.966939	-0.948962	-1.25944	484	1	GGGGCCTGCAGGCAGAAGTG
BCAR1	0.0976838	0.966939	-0.94882	-1.25925	484	1	GAACAGAGGGGTCGGACCCC
NBEA	0.098288	0.966939	-0.948678	-1.25907	487	1	CTTACCGCAGCGCTACAACC
COL18A1	0.0984894	0.966939	-0.948536	-1.25888	488	1	CGCCGGCCGCAGGTGCACGT
RSPH4A	0.0990937	0.966939	-0.948394	-1.25869	491	1	CGATTCTGACTACATAGAAC
SMIM13	0.0996979	0.966939	-0.948251	-1.2585	494	1	CGAGCGGATCTGATTCTGTG
SDAD1	0.100302	0.966939	-0.948109	-1.25831	497	1	CAGCTCTGCTAGTTCTTTGC
IL10	0.101309	0.966939	-0.947683	-1.25775	502	1	AGCGCCGTAGCCTCAGCCTG
PCBD2	0.101511	0.966939	-0.947541	-1.25756	503	1	TCACCATGGCCGCTAGCCCT
UNKL	0.101511	0.966939	-0.947398	-1.25737	503	1	GCCGGTGGCTTCGTTGTACT
LITAF	0.101511	0.966939	-0.947114	-1.25699	503	1	GCTGGCTGGGTATAATACGA
TRIM7	0.101913	0.966939	-0.946972	-1.2568	505	1	GGGTCGGCTGCTAGGCCGCC
LOC100288332	0.220312	0.999908	-0.693912	-1.25648	973	3	ATTCCAGGTTATCAATACTC,CACAAAGGTAACTTGTGCAG
LOC642778	0.220312	0.999908	-0.693912	-1.25648	973	3	ATTCCAGGTTATCAATACTC,CACAAAGGTAACTTGTGCAG
LOC642799	0.220312	0.999908	-0.693912	-1.25648	973	3	ATTCCAGGTTATCAATACTC,CACAAAGGTAACTTGTGCAG
NPIP	0.220312	0.999908	-0.693912	-1.25648	973	3	ATTCCAGGTTATCAATACTC,CACAAAGGTAACTTGTGCAG
NPIPA1	0.220312	0.999908	-0.693912	-1.25648	973	3	ATTCCAGGTTATCAATACTC,CACAAAGGTAACTTGTGCAG
NPIPA2	0.220312	0.999908	-0.693912	-1.25648	973	3	ATTCCAGGTTATCAATACTC,CACAAAGGTAACTTGTGCAG
NPIPA3	0.220312	0.999908	-0.693912	-1.25648	973	3	ATTCCAGGTTATCAATACTC,CACAAAGGTAACTTGTGCAG
FABP3	0.101913	0.966939	-0.946688	-1.25642	505	1	CTTGCTGTCCACTAGCTTCC
BCL7A	0.101913	0.966939	-0.946545	-1.25624	505	1	GGACCCATTTGTAGATTCGT
NOL6	0.102316	0.966939	-0.946403	-1.25605	507	1	TTCAGCCAATGTACGCTTCC
SLC50A1	0.102518	0.966939	-0.946119	-1.25567	508	1	CCCATTACAGCTCGGACCTC
DPY30	0.103525	0.966939	-0.945835	-1.25529	513	1	TGTCCCTCCAGCATCTGCTC
LIMS3	0.103726	0.966939	-0.945692	-1.2551	514	1	GCACCCACGATGGCCTTCTC
LIMS3L	0.103726	0.966939	-0.945692	-1.2551	514	1	GCACCCACGATGGCCTTCTC
NonTargetingControlGuideForHuman_0293	0.104532	0.966939	-0.94555	-1.25492	518	1	CTCCCATTGATCTACGATGG
FBXL19	0.105136	0.966939	-0.945408	-1.25473	521	1	TGCAACGAGATCGTCCACCC
CDH18	0.105136	0.966939	-0.945266	-1.25454	521	1	GACTACGGAGTAATGTTCTC
RMND5A	0.105337	0.966939	-0.945124	-1.25435	522	1	CCGCCCTACCGTGGCTCTGC
NonTargetingControlGuideForHuman_0881	0.106344	0.966939	-0.944839	-1.25397	527	1	GAGCTTAGCAAAGGGTTGGG
RIC8A	0.106546	0.966939	-0.944697	-1.25378	528	1	CGCTGCCCTTTACCGACACC
SPPL2A	0.106949	0.966939	-0.944555	-1.25359	530	1	ACCTCCTTTCTGTGCAATTC
BCAS1	0.107351	0.966939	-0.944413	-1.25341	532	1	CAGTGAGTTCGTGTCCACCG
ZNF444	0.107956	0.966939	-0.944129	-1.25303	535	1	CTTCTACTGGCGCGAGCACC
ITGB7	0.107956	0.966939	-0.943986	-1.25284	535	1	GGGACGCACAAGCCTTCGAG
SPRTN	0.223479	0.999908	-0.691779	-1.25262	987	3	CGTTTGACATAGCCGTAATA,TGGATGAGTATCGGCGACAC
hsa-mir-342	0.108761	0.966939	-0.943702	-1.25246	539	1	CTATCTGTGATTGAGGGACA
hsa-mir-6769a	0.109164	0.966939	-0.94356	-1.25227	541	1	TGAGCCCCTCTCTGCTCTCC
ALPK2	0.109567	0.966939	-0.943418	-1.25209	543	1	GTGCTTCGCTGCATAATATC
OAZ1	0.200479	0.999908	-0.794383	-1.25174	920	2	GAGAATCCTCGTCTTGTCGT
COBLL1	0.110373	0.966939	-0.943133	-1.25171	547	1	TTTGCTGACTGCAATCCGTT
ZNF578	0.110373	0.966939	-0.942991	-1.25152	547	1	CTGTACAAAGCCCTCTGCGC
PTOV1	0.201785	0.999908	-0.79405	-1.25122	926	2	CGCTCACGGCCAGACCCCCG
FBXO38	0.110775	0.966939	-0.942707	-1.25114	549	1	TGGTTGATATCAACCTAGTA
ADAMTS20	0.11138	0.966939	-0.942565	-1.25095	552	1	ATTAGTTATGATTCACCGTG
CBWD1	0.111581	0.966939	-0.942423	-1.25076	553	1	ACCAGGGTCTGCTAATCCAG
CBWD3	0.111581	0.966939	-0.942423	-1.25076	553	1	ACCAGGGTCTGCTAATCCAG
CBWD5	0.111581	0.966939	-0.942423	-1.25076	553	1	ACCAGGGTCTGCTAATCCAG
CBWD6	0.111581	0.966939	-0.942423	-1.25076	553	1	ACCAGGGTCTGCTAATCCAG
XAGE1A	0.111581	0.966939	-0.94228	-1.25058	553	1	TCTTCTTCTGTCTGCTGCCC
XAGE1B	0.111581	0.966939	-0.94228	-1.25058	553	1	TCTTCTTCTGTCTGCTGCCC
XAGE1C	0.111581	0.966939	-0.94228	-1.25058	553	1	TCTTCTTCTGTCTGCTGCCC
XAGE1D	0.111581	0.966939	-0.94228	-1.25058	553	1	TCTTCTTCTGTCTGCTGCCC
XAGE1E	0.111581	0.966939	-0.94228	-1.25058	553	1	TCTTCTTCTGTCTGCTGCCC
hsa-mir-518c	0.111782	0.966939	-0.942138	-1.25039	554	1	CGCTTCTCTTTAGAGTGTTA
hsa-mir-4656	0.111782	0.966939	-0.941854	-1.25001	554	1	AGCCCAGGAAGCAGGAGGCC
TMEM87B	0.112185	0.966939	-0.941427	-1.24944	556	1	AGATTGCAACAGTGATTCAC
hsa-mir-4670	0.11279	0.966939	-0.941285	-1.24925	559	1	TAATGGCTGAATGATTCTCT
DCPS	0.112991	0.966939	-0.941143	-1.24907	560	1	ATCCCTACGCGACCTTACTC
HIF1A	0.112991	0.966939	-0.941001	-1.24888	560	1	TTCTTTACTTCGCCGAGATC
IVNS1ABP	0.113394	0.966939	-0.940859	-1.24869	562	1	GTTCTGTGATGTTCGACTTC
FOXN3	0.113797	0.966939	-0.940717	-1.2485	564	1	TCACAACCTGCTTGTATCTC
MT1E	0.113998	0.966939	-0.940574	-1.24831	565	1	CCCGCACTCACTCTTCTTGC
MT1G	0.113998	0.966939	-0.940574	-1.24831	565	1	CCCGCACTCACTCTTCTTGC
MT1H	0.113998	0.966939	-0.940574	-1.24831	565	1	CCCGCACTCACTCTTCTTGC
OTX2	0.113998	0.966939	-0.940432	-1.24812	565	1	TCGGGCGCAGCTAGATGTGC
AGGF1	0.114401	0.966939	-0.94029	-1.24793	567	1	TCTATAGTATTTCCACTAGT
CNN3	0.115005	0.966939	-0.940006	-1.24756	570	1	CTCGGCCGAAGTCAAGAACA
CNOT7	0.115811	0.966939	-0.939721	-1.24718	574	1	CAGGGAGGACATGTATGCCC
hsa-mir-4664	0.115811	0.966939	-0.939579	-1.24699	574	1	AGTCGCTCAGTGATAACTTG
CXorf40B	0.115811	0.966939	-0.939437	-1.2468	574	1	GATGACTCCTGCTCAGATTC
ZZEF1	0.116012	0.966939	-0.939153	-1.24642	575	1	TGCGCTTCCTGCACCGCAAT
SEL1L3	0.116415	0.966939	-0.939011	-1.24624	577	1	TGGAGGCCACTCGACGCCAG
IQCB1	0.116415	0.966939	-0.938868	-1.24605	577	1	TCATGACTGCAGATCCTATT
SS18	0.117019	0.966939	-0.938726	-1.24586	580	1	CAGGCATCTGGCCGTTCATC
SPG7	0.117623	0.966939	-0.938584	-1.24567	583	1	AGCCTTGATGTACCGAATGC
NECAB1	0.118832	0.966939	-0.9383	-1.24529	589	1	TGGAGGACGGCGATGTCTCC
hsa-mir-5579	0.119436	0.966939	-0.938015	-1.24492	592	1	TCTGGTACTCCTTAAGCTAA
PGAM4	0.210274	0.999908	-0.790014	-1.24486	965	2	TGGAGAACCGCTTCAGCTGC
PAPLN	0.119637	0.966939	-0.937873	-1.24473	593	1	GTTCGACGGAGCGGAGTTCC
ZBTB41	0.119637	0.966939	-0.937731	-1.24454	593	1	GTGACCTATACTCATTCTGC
FGFBP1	0.119839	0.966939	-0.937589	-1.24435	594	1	CTTTCTGTGAGCGCAGATTC
EXOC2	0.211145	0.999908	-0.789636	-1.24426	969	2	CTCACGCCATCCAGACTGTA
hsa-mir-5095	0.12004	0.966939	-0.937447	-1.24416	595	1	CAGGCGTGAACCACCGCGCC
2019-03-10	0.120443	0.966939	-0.937305	-1.24397	597	1	AGAAGAAACGCGATCAGTTT
hsa-mir-507	0.122054	0.966939	-0.936878	-1.24341	605	1	AAGCACTACACACAGCACAG
hsa-mir-6808	0.122256	0.966939	-0.936736	-1.24322	606	1	CATGGTCCCACCTCCCTGCC
RNF111	0.122256	0.966939	-0.936594	-1.24303	606	1	TTCTGTGACGACCCTCCACA
THUMPD3	0.12286	0.966939	-0.936452	-1.24284	609	1	CGACATGACCAACTTTGATG
HAVCR1	0.123061	0.966939	-0.936309	-1.24265	610	1	GCTCGTTCGAACAGTCGTGA
ITPRIPL2	0.123263	0.966939	-0.936167	-1.24246	611	1	CCCTCAATCTACGCGTCTTC
hsa-mir-520b	0.212669	0.999908	-0.788384	-1.24229	976	2	GTCAGGCTGTGTCCCTCTAC
VWA8	0.124673	0.966939	-0.935883	-1.24208	618	1	AATGTATTCGACCTCCCGTT
NFIL3	0.124673	0.966939	-0.935741	-1.2419	618	1	ACATCGGACAGCGAGCTTTG
hsa-mir-1827	0.124673	0.966939	-0.935599	-1.24171	618	1	TGCTGCTGAACATGGCCTTC
ARID1A	0.213757	0.999908	-0.787857	-1.24146	981	2	GCGGTACCCGATGACCATGC,ATGGTCATCGGGTACCGCTG
FCGBP	0.125076	0.966939	-0.935314	-1.24133	620	1	TGCCCATCATGTCGTAGCGA
DIAPH2	0.125478	0.966939	-0.93503	-1.24095	622	1	CTTTAACCAGCAATCCGGTC
REM1	0.126083	0.966939	-0.934746	-1.24058	625	1	GTATACTCCATCGCAGACCG
MGAM	0.126284	0.966939	-0.934603	-1.24039	626	1	CAGGCCACATGTGACCAACG
RD3	0.126687	0.966939	-0.934461	-1.2402	628	1	CGCCCTTCGCCAGCGACATC
BCL6	0.126888	0.966939	-0.934319	-1.24001	629	1	CTACAAGTGTGACCGCTGCC
CASR	0.216587	0.999908	-0.786841	-1.23986	994	2	ACATCATCGAGTATTTCCGC
F13A1	0.12709	0.966939	-0.934177	-1.23982	630	1	TACCTTGCAGGTTGACGCCC
hsa-mir-1282	0.127291	0.966939	-0.934035	-1.23963	631	1	ATCTTGTCCTTTTTGCCCTC
FRS2	0.127492	0.966939	-0.933893	-1.23944	632	1	TACCTCTGCCTGCGACGCTA
FAM20A	0.127694	0.966939	-0.93375	-1.23925	633	1	GCAGATGAACCTTACCTCCC
CENPBD1	0.127694	0.966939	-0.933608	-1.23907	633	1	CGCTCAAGGTCGCATTTGGC
ZNF770	0.127895	0.966939	-0.933324	-1.23869	634	1	TTTCCGATCTCCATCTAAAC
ACSM2A	0.128097	0.966939	-0.93304	-1.23831	635	1	ACAGGCTCCCGAGAGGACGT
PKP3	0.128298	0.966939	-0.932755	-1.23793	636	1	GAAACCTGTCTCGGAACGCT
FDX1L	0.128499	0.966939	-0.932613	-1.23775	637	1	CCCTCCTCCAGGAGAACTCG
CSRNP3	0.128701	0.966939	-0.932329	-1.23737	638	1	TATGGCGGCTGGACATCCCC
ANKMY2	0.128701	0.966939	-0.932187	-1.23718	638	1	GTTGACACGAACATTCTTGC
STRA13	0.128902	0.966939	-0.932044	-1.23699	639	1	GGCAGAAGACGCGCTCCGTG
HYPK	0.129507	0.966939	-0.931902	-1.2368	642	1	GCACCGCTGTCATGTTTCCG
IGSF11	0.219852	0.999908	-0.784871	-1.23676	1009	2	CTGTAAATCCTACCCTACCG,GACTTCTCAGCGTTCCCCTC
PPP1R15A	0.130312	0.966939	-0.931476	-1.23624	646	1	CTTCGCACGCCGCATCACCC
hsa-mir-764	0.130514	0.966939	-0.931334	-1.23605	647	1	CACTTGTCCTCCTCCATGCT
GOLGA3	0.130514	0.966939	-0.931191	-1.23586	647	1	CTCCAGACGGTCGTCAGTGT
ALDOA	0.131118	0.966939	-0.931049	-1.23567	650	1	CCTTGCCAGGTGCCACGATG
ZDHHC1	0.131118	0.966939	-0.930907	-1.23548	650	1	ATAGCTCTTGTCCCGCACGT
UPB1	0.220287	0.999908	-0.784018	-1.23541	1011	2	CATGCTCGCTGTCTCGTTCC,TGCCCTTCATAGACGCATAA
TCERG1L	0.131923	0.966939	-0.930765	-1.23529	654	1	TCTGCTCTTGCAACCCCTAT
ENOSF1	0.131923	0.966939	-0.930623	-1.2351	654	1	TAAACGCGGTGTGGGACTTG
RPAP1	0.132125	0.966939	-0.930481	-1.23492	655	1	ATGCTGTCGAGACCGAAGCC
VIPAS39	0.132528	0.966939	-0.930338	-1.23473	657	1	GAACAGCCTCCGAGACTTCG
VPS11	0.22094	0.999908	-0.783496	-1.23459	1014	2	AGACTGACCGGATATATTGC
ADH4	0.133535	0.966939	-0.930196	-1.23454	662	1	AGACTTACATAAACCGATCC
MRPS5	0.133938	0.966939	-0.930054	-1.23435	664	1	CCAATTTGCAGGTCATTTAT
C22orf26	0.134139	0.966939	-0.929912	-1.23416	665	1	TCAGGTTGGTCTCAAACTCC
UBB	0.134542	0.966939	-0.92977	-1.23397	667	1	CAAGACCATCACCCTTGAGG
FKBP9	0.134542	0.966939	-0.929628	-1.23378	667	1	ATGGTCCGAGGGCAACTCGG
B3GALT6	0.134945	0.966939	-0.929485	-1.23359	669	1	CGCGCTTCGACACCGAATAC
hsa-mir-640	0.13575	0.966939	-0.929343	-1.23341	673	1	CTGCCTCTACGGTTGCCTTG
NEK7	0.135952	0.966939	-0.929201	-1.23322	674	1	CGACCTATCCAGAATGATCA
SMPD1	0.136153	0.966939	-0.929059	-1.23303	675	1	ATCAACTCCACGGATCCCGC
SF3B4	0.136354	0.966939	-0.928917	-1.23284	676	1	CCAGTTACCCTGATTCCGCT
GPR182	0.136757	0.966939	-0.928775	-1.23265	678	1	AGCGTTACCAGCACCGAGTG
OR10G9	0.136757	0.966939	-0.928632	-1.23246	678	1	CTGTGCCTCCCACTGCATCG
IFRD1	0.136959	0.966939	-0.92849	-1.23227	679	1	TTAGGAACTATACTCAACTC
CDV3	0.13716	0.966939	-0.928348	-1.23208	680	1	TACACACCACTAGTCATCGC
MSH4	0.137362	0.966939	-0.928206	-1.2319	681	1	GTGTGCAGAAATCGCAGATG
PCSK6	0.137764	0.966939	-0.928064	-1.23171	683	1	GCGACAAGAACAGTCGCTGC
NonTargetingControlGuideForHuman_0545	0.138369	0.966939	-0.927779	-1.23133	686	1	AAAAAGCTTCCGCCTGATGG
AGBL4	0.138973	0.966939	-0.927495	-1.23095	689	1	TGTTTACTACTACCGCTGCC
2019-03-08	0.139376	0.966939	-0.927353	-1.23076	691	1	GAGCTCGCAGCAGCGCGTGT
DYNAP	0.139577	0.966939	-0.927211	-1.23058	692	1	TCCACATAGACCAGTCATTG
RNASE13	0.139778	0.966939	-0.926784	-1.23001	693	1	TTGCATCTTGCCTCGCATAT
STAG1	0.140383	0.966939	-0.926358	-1.22944	696	1	TTCAAGCTCGCTGCCAGCAT
C21orf2	0.140383	0.966939	-0.926216	-1.22925	696	1	TCATCCCAAAGCTGTGACGG
C10orf55	0.141188	0.966939	-0.925789	-1.22869	700	1	GTATCCACCCCTACAACAGT
LRRC37B	0.141188	0.966939	-0.925647	-1.2285	700	1	GCCAAGCTCATGTTGCGAAC
PPM1N	0.141591	0.966939	-0.925363	-1.22812	702	1	GAAGTCCAACCCCACGCATT
TXNL4A	0.141591	0.966939	-0.92522	-1.22793	702	1	CGAAGCGGATGACGACCACG
TICAM2	0.141994	0.966939	-0.925078	-1.22775	704	1	CCCTAATGAACTCCGTTAAC
TMED7-TICAM2	0.141994	0.966939	-0.925078	-1.22775	704	1	CCCTAATGAACTCCGTTAAC
IFI27L1	0.141994	0.966939	-0.924936	-1.22756	704	1	CAGTGTGGTGTTCAGCTGGA
MMP12	0.142598	0.969038	-0.924794	-1.22737	707	1	ATGATGCACGCACCTCGATG
CHEK2	0.143001	0.969085	-0.924652	-1.22718	709	1	ATCATACTTAGACTGCAAAC
GABARAPL1	0.144209	0.973797	-0.92451	-1.22699	715	1	CTTCCAGGTGATTGTAGAGA
RSC1A1	0.144612	0.974528	-0.924367	-1.2268	717	1	TGATGGCCTGTCAACCGATA
hsa-mir-1469	0.145217	0.974528	-0.924225	-1.22661	720	1	TGCCAATGGCGCGCTCGGCG
HIST3H3	0.145619	0.974528	-0.923799	-1.22605	722	1	GGAGGCGTGCGAGTCTTACC
KIAA0391	0.146224	0.975286	-0.923514	-1.22567	725	1	TATTGTAAGTTACGATTTAC
SLC25A51	0.146828	0.975286	-0.923372	-1.22548	728	1	AACTTATGAGTTCTTGTTAA
hsa-mir-4293	0.231171	0.999908	-0.77762	-1.22533	1061	2	TCAGGCTGTTCCTGTCAGGC,TCAGTCAGGCTGTTCCTGTC
DDTL	0.146828	0.975286	-0.92323	-1.22529	728	1	TTACGTCCGCAGGTTTGCCC
INPP5J	0.146828	0.975286	-0.923088	-1.2251	728	1	TCCGCCTTGTCCATATGCGC
CCDC159	0.231389	0.999908	-0.777364	-1.22493	1062	2	GAAGACCCTGCGTGACAGTG
JAGN1	0.147231	0.975286	-0.922946	-1.22492	730	1	GAAGCTGATCTACGTACATC
CAMSAP1	0.148439	0.975286	-0.922804	-1.22473	736	1	CCGACAGTCTGTATAATATT
MRPS11	0.148439	0.975286	-0.922661	-1.22454	736	1	CTGTAACTTACCAAGCGTCC
ARHGAP10	0.149648	0.980526	-0.922519	-1.22435	742	1	TGAAACCCTGATTAAACCCT
SEL1L	0.150453	0.982871	-0.922377	-1.22416	746	1	AGCATATCGGTATCTCCAAA
CAMK2G	0.151863	0.985979	-0.921666	-1.22322	753	1	ACCAGCATGACATCGTCCAC
hsa-mir-4488	0.152266	0.985979	-0.921524	-1.22303	755	1	CTGGATGGGCAGGTAGGGGG
SPATC1L	0.152266	0.985979	-0.921382	-1.22284	755	1	CTACAGCCGCGACGTGCACC
PIP4K2B	0.152669	0.985979	-0.92124	-1.22265	757	1	CACCCCGTGTTTCACCGTTT
NPC2	0.15287	0.985979	-0.921098	-1.22246	758	1	ATTCCACTCTTACAACCATC
SAA1	0.235089	0.999908	-0.775771	-1.22242	1079	2	CGTGATCACTTCTGCAGCCC,GCCACTCCTGCCCCATTCAT
HILPDA	0.153273	0.985979	-0.920955	-1.22227	760	1	GGGTCAGTACCACACCTAAC
PRR14L	0.153474	0.985979	-0.920813	-1.22208	761	1	TGCTGGATGAAAATCCGTCC
VAPA	0.154079	0.986972	-0.920387	-1.22152	764	1	GTCATCCTTCGTGTGATAAC
ZFP41	0.154079	0.986972	-0.920245	-1.22133	764	1	GCCATCAGAAACGCCACCCT
SRY	0.154481	0.987878	-0.920102	-1.22114	766	1	ATTATAAGTATCGACCTCGT
hsa-mir-99b	0.154884	0.987878	-0.919818	-1.22076	768	1	TCGTGTCTGTGGGTCCGTGT
RGS7	0.154884	0.987878	-0.919676	-1.22058	768	1	AAATGGAATTCCTATTCGTA
NPL	0.154884	0.987878	-0.919534	-1.22039	768	1	GAGCGTCTCAGAGCGTCGCC
TGIF2LX	0.155086	0.987878	-0.919392	-1.2202	769	1	CTGAAGTCGGCGTGCTCCTC
DHX58	0.155287	0.987878	-0.919249	-1.22001	770	1	CCTGAGTTGAGCCGGAAATT
GGNBP2	0.237919	0.999908	-0.774207	-1.21995	1092	2	GATAATGTGTTAAATCTCGA,TCGAGATTTAACACATTATC
hsa-mir-153-2	0.156495	0.990887	-0.918965	-1.21963	776	1	CAACATCACAAAAATGACAC
NDST2	0.156697	0.991209	-0.918823	-1.21944	777	1	ATTCTACCCATCTACAACGC
ICA1	0.1571	0.991852	-0.918681	-1.21925	779	1	ATATCGATCCTGTAAGTCCC
NYX	0.1571	0.991852	-0.918396	-1.21888	779	1	CAACCTGTTCCGCCGCGTGC
AP2A2	0.157704	0.99313	-0.918112	-1.2185	782	1	GATCGGGGGACGTCCTGTAC
LENG8	0.240531	0.999908	-0.773075	-1.21817	1104	2	TCATGCGGTTCCACAGCTGT
STAC	0.157905	0.99313	-0.917828	-1.21812	783	1	CGCTGTTGCTGCGTTTCCTT
LSAMP	0.158912	0.995659	-0.917543	-1.21775	788	1	CAAGTTTACTTGATCGTACA
ZNF438	0.159517	0.996173	-0.917259	-1.21737	791	1	TTCACCTGATCAGAGCGTGA
RBBP7	0.241837	0.999908	-0.772424	-1.21714	1110	2	CGCGCAGCCCCTGTACGTAC
OLFML1	0.159718	0.996173	-0.916975	-1.21699	792	1	TGAGAGTTGAACGTGCCCAA
SMAP2	0.160121	0.996173	-0.916833	-1.2168	794	1	AAAAGATACGGGTCTATCTG
MMP7	0.160121	0.996173	-0.91669	-1.21661	794	1	TAACCTGTAGGTGACCACTT
POPDC2	0.161128	0.996173	-0.916406	-1.21624	799	1	CCTGGTATACCGCCTGCGTG
FRMD4A	0.161934	0.996173	-0.916264	-1.21605	803	1	CTTCTTGCAGCCCAAGCTGT
FLI1	0.161934	0.996173	-0.916122	-1.21586	803	1	TTCTTTGACACTCAATCGTG
MFSD6	0.162135	0.996173	-0.91598	-1.21567	804	1	GACTAACACGCCTCCGATCA
GRAMD3	0.162135	0.996173	-0.915837	-1.21548	804	1	TCCAAGCACAGCTTATGCCC
ARAF	0.162336	0.996173	-0.915695	-1.21529	805	1	CGTAGACACTCATGCCATCC
LRRC37A	0.244449	0.999908	-0.771214	-1.21524	1122	2	CGCGAAGAGCATCCCCTCCA
HLA-E	0.162336	0.996173	-0.915553	-1.2151	805	1	GGATTATCTCACCCTGAATG
MBLAC1	0.163142	0.996173	-0.915269	-1.21473	809	1	GTGACCAGGTACGACCACGT
RAP1GAP2	0.163545	0.996173	-0.915127	-1.21454	811	1	GAGGGTCGCATCCGAGCTGT
ARHGEF6	0.163746	0.996173	-0.914984	-1.21435	812	1	GATCCTGATGACCTTTATTC
CDC42BPA	0.163948	0.996173	-0.914842	-1.21416	813	1	TCATTCACAGTACCTGGTTA
DOCK5	0.164149	0.996241	-0.9147	-1.21397	814	1	ACTTACCCTCGTACATCTCC
WDR53	0.266908	0.999908	-0.670364	-1.21384	1179	3	GGACCATTATGGCAGTCAAG,TGGAACCGCGTGTGTCCTAA,TTAGGACACACGCGGTTCCA
PM20D2	0.16435	0.996545	-0.914558	-1.21378	815	1	TGCATTAGATGCTGCTGTGC
MYL5	0.164753	0.998068	-0.914416	-1.21359	817	1	TGACAAGATGACGGCGGAAG
CNPY2	0.165358	0.998169	-0.914274	-1.21341	820	1	CAAGAACTACGTACGTGTAG
BNIP2	0.246408	0.999908	-0.769957	-1.21326	1131	2	TCCAGACATTAGCCTGACAC
BABAM1	0.165358	0.998169	-0.914131	-1.21322	820	1	TGGTGAACGATGACACGGCC
DENND4A	0.166163	0.998953	-0.913989	-1.21303	824	1	TCGACTTTGCAGAACGTGTG
RPS10	0.16717	0.998953	-0.913705	-1.21265	829	1	GGAACCATACCTTTAGGCCG
RPS10-NUDT3	0.16717	0.998953	-0.913705	-1.21265	829	1	GGAACCATACCTTTAGGCCG
TCF15	0.167976	0.998953	-0.913563	-1.21246	833	1	GCAGGGTGGCCGTCGTGACC
RASSF6	0.168379	0.998953	-0.913421	-1.21227	835	1	GATGGCAAACTAATTGTTGA
OSCAR	0.16858	0.998953	-0.913136	-1.2119	836	1	GAGCTTCGTGCTGTACCGCG
NDFIP2	0.168983	0.998953	-0.912994	-1.21171	838	1	GACGCAGCCTGCACAATCTG
C15orf38-AP3S2	0.248585	0.999908	-0.768946	-1.21166	1141	2	TCGCCGTAAATTCGACGCCA,TTAGGTGCACTACATCCTCC
HPS1	0.168983	0.998953	-0.912852	-1.21152	838	1	CTGGCAGATGAAGTGCGTCT
CEBPE	0.168983	0.998953	-0.91271	-1.21133	838	1	CTCTCCGCCTACATCGAGTC
DDO	0.169386	0.998953	-0.912568	-1.21114	840	1	CTCGGCGAATAGAAGACCTG
HCK	0.169587	0.998953	-0.912425	-1.21095	841	1	CCGTGCGAGACTACGACCCT
ENTPD2	0.170796	0.998953	-0.912141	-1.21058	847	1	CATCCTGAAGCGCCTGTTCG
LOC81691	0.170796	0.998953	-0.911999	-1.21039	847	1	CAAAAACCACTACGTTGTTT
PMPCA	0.170997	0.998953	-0.911857	-1.2102	848	1	AGGTCGCGTTATACATCCAG
POGZ	0.251197	0.999908	-0.767951	-1.21009	1153	2	GTAGAACTCGATCAGCAGAA,TCTGCTGATCGAGTTCTACG
TXLNB	0.172407	0.998953	-0.91143	-1.20963	855	1	TCTCCAATTTGCTTCGAGCG
SPINK13	0.173011	0.998953	-0.911146	-1.20925	858	1	TCAATAAACGTGACTTCACT
AMDHD2	0.173817	0.998953	-0.911004	-1.20907	862	1	TCAGCGCCCGGATCACTTCG
hsa-mir-4743	0.17422	0.998953	-0.910862	-1.20888	864	1	GTCCCTCCTCTCCTGCTGGC
SPG11	0.174622	0.998953	-0.910719	-1.20869	866	1	GCGGGTTCTACCGATGCTGT
NonTargetingControlGuideForHuman_0399	0.174824	0.998953	-0.910577	-1.2085	867	1	GCCTAGTCTCGGTAAGAGTG
NME1-NME2	0.175227	0.998953	-0.910435	-1.20831	869	1	CTGCACGCCGTCCGGCTTGA
NME2	0.175227	0.998953	-0.910435	-1.20831	869	1	CTGCACGCCGTCCGGCTTGA
WSCD2	0.175227	0.998953	-0.910293	-1.20812	869	1	CCTCGCTCACGTTCGTCGCC
ARHGEF11	0.175227	0.998953	-0.910151	-1.20793	869	1	CATCCGAAGGCTGGCGATGG
hsa-mir-3198-1	0.175428	0.998953	-0.910009	-1.20775	870	1	CAGACGGTTCTGTGGAGTCC
RAVER1	0.175629	0.998953	-0.909866	-1.20756	871	1	CACGCACCCTCTACGTGCAC
PCDHB9	0.175629	0.998953	-0.909724	-1.20737	871	1	CAAGACCACAATGCGTATAG
PGM1	0.175831	0.998953	-0.909582	-1.20718	872	1	ATCCGTATTGATGCTATGCA
TAC4	0.177039	0.998953	-0.909156	-1.20661	878	1	ACACACGTTCCAGGGCCTCC
RASAL3	0.177241	0.998953	-0.909013	-1.20642	879	1	ACCCGACGGAATATCGAGCG
hsa-mir-1254-1	0.177644	0.998953	-0.908871	-1.20624	881	1	AGGATTTCATTTTGTTGCCT
PSMD7	0.178046	0.998953	-0.908729	-1.20605	883	1	GCACACCAACAACACGCTTC
DHDDS	0.178248	0.998953	-0.908587	-1.20586	884	1	AAGCCCGTCTACCTCACTCT
HIST1H1D	0.178852	0.998953	-0.908303	-1.20548	887	1	GCCTAAGTCGGGGAAGCCGA
EFCAB14	0.179053	0.998953	-0.90816	-1.20529	888	1	CTCTGAGTCCAGCTCCGAAG
C4orf48	0.179255	0.998953	-0.908018	-1.2051	889	1	ACCGGCAGACGTTCCGCGTC
ZFP2	0.180665	0.998953	-0.907734	-1.20473	896	1	ATCATCCCTTACCGTGCATC
NUMBL	0.181067	0.998953	-0.90745	-1.20435	898	1	GCTCTGCCGTAACTTGTTCA
RPS3	0.181269	0.998953	-0.907307	-1.20416	899	1	TTGGATTAGTTTGTCGCTGA
hsa-mir-942	0.181269	0.998953	-0.907165	-1.20397	899	1	GGAGAGTATCTTCTCTGTTT
DAZ1	0.276408	0.999908	-0.664822	-1.20381	1221	3	TAGATGGATGAAACTGAGAT
DAZ2	0.276408	0.999908	-0.664822	-1.20381	1221	3	TAGATGGATGAAACTGAGAT
DAZ3	0.276408	0.999908	-0.664822	-1.20381	1221	3	TAGATGGATGAAACTGAGAT
DAZ4	0.276408	0.999908	-0.664822	-1.20381	1221	3	TAGATGGATGAAACTGAGAT
RFC4	0.181672	0.998953	-0.907023	-1.20378	901	1	CGCAAGTCGCCCAAAATGTG
CLIC6	0.181672	0.998953	-0.906881	-1.20359	901	1	CCGCGCGCGTGAACGGCCGC
KIAA1147	0.181672	0.998953	-0.906739	-1.20341	901	1	CTATAGCACACCACGCCCAC
TARP	0.259687	0.999908	-0.763685	-1.20337	1192	2	CAGGATGTCTACACTATAGC,GCTATAGTGTAGACATCCTG
OR2A14	0.181873	0.998953	-0.906597	-1.20322	902	1	CATAAGATTCGTCAGCATCT
SPZ1	0.182276	0.998953	-0.906454	-1.20303	904	1	AGGAGTAGGGTTAACGGTTT
SHE	0.182477	0.998953	-0.906312	-1.20284	905	1	CGGCAAATTGCGCAAGAACT
ASPG	0.183082	0.999662	-0.90617	-1.20265	908	1	GTGCTCCTCGTCATGGAACA
KRTAP22-2	0.183686	0.999908	-0.906028	-1.20246	911	1	TGCTACTACCACAACTATTA
C17orf66	0.18429	0.999908	-0.905886	-1.20227	914	1	TGCCAGTGCGTGTAGATCTC
LBH	0.184894	0.999908	-0.905601	-1.2019	917	1	GCTGAGGCCGATCTCCTCCA
ZBTB4	0.1857	0.999908	-0.905459	-1.20171	921	1	GCCAGCACGCGGGGGTCTAC
MRPS6	0.186103	0.999908	-0.905317	-1.20152	923	1	ATTAAAGCCAGCTCGTAGCG
CCDC179	0.186304	0.999908	-0.905175	-1.20133	924	1	TGCCGCTCAGTGACCTCTGA
NonTargetingControlGuideForHuman_0181	0.186304	0.999908	-0.905033	-1.20114	924	1	ACTAGCCTGTTCGCGAGTAG
MILR1	0.186908	0.999908	-0.904891	-1.20095	927	1	TTTATTTACTAAAGCGATTC
ACSL5	0.187311	0.999908	-0.904748	-1.20076	929	1	TTTAGACAATGGGCCCTGCT
SH3D19	0.264475	0.999908	-0.761837	-1.20046	1214	2	ACTTACCTCGGTGGCAACCT,TAATCGATCCTCTTCTGACA
OR6C65	0.187915	0.999908	-0.904464	-1.20039	932	1	GTGCAAGCAATCAGCAGCAT
GLT8D2	0.187915	0.999908	-0.904322	-1.2002	932	1	GTATTCGAGTCAGAGTATTC
MYO18B	0.188117	0.999908	-0.90418	-1.20001	933	1	GAACCACTTACCTCTCGTTC
hsa-mir-101-2	0.188117	0.999908	-0.904038	-1.19982	933	1	CTGTCCTTTTTCGGTTATCA
KRTAP22-1	0.189325	0.999908	-0.903611	-1.19925	939	1	AGCTTTGATAACAACTACCA
RPL7A	0.189325	0.999908	-0.903469	-1.19907	939	1	ACACGACGTGGATCCCATCG
hsa-mir-320b-1	0.18993	0.999908	-0.903042	-1.1985	942	1	TTCTAGTTCTTCCTAGAGTG
CDK10	0.191138	0.999908	-0.902616	-1.19793	948	1	TGTTTCAGCTGGGACGATGC
SLC8A3	0.191339	0.999908	-0.902474	-1.19774	949	1	GTGCATGACGTAGTCAAAGC
FBRSL1	0.191541	0.999908	-0.902332	-1.19756	950	1	GCTGGGCTTACCTTGTCGTC
NINJ2	0.191742	0.999908	-0.902189	-1.19737	951	1	GCTCTCCGCCACGCTCTTCT
PCOLCE	0.192548	0.999908	-0.902047	-1.19718	955	1	CGCCTGCCGCTACGATGCTC
TFAP2D	0.192749	0.999908	-0.901905	-1.19699	956	1	TGAGCGCCCGCGCATTGTGC
FGF4	0.193353	0.999908	-0.901763	-1.1968	959	1	CTCCTTGAACGTGCACTCAT
ITGA9	0.193756	0.999908	-0.901621	-1.19661	961	1	ACCTCGAGCCATGTCCAGTT
PHC3	0.269047	0.999908	-0.759295	-1.19645	1235	2	TTCAGACCGACATGCTGTAC
ROBO2	0.193958	0.999908	-0.901479	-1.19642	962	1	TGTAGGATCGCGTCTTCGCC
IRGC	0.194562	0.999908	-0.901336	-1.19624	965	1	GCATGGCGCCGTCGGACGAC
PDGFA	0.194763	0.999908	-0.901194	-1.19605	966	1	AATCTCGTAAATGACCGTCC
MKS1	0.195166	0.999908	-0.901052	-1.19586	968	1	TCCTTCCCGAGCTCGGCAGC
TPBGL	0.195368	0.999908	-0.90091	-1.19567	969	1	GCAACCTGCGCGAGGCGTGC
LRRC6	0.19577	0.999908	-0.900768	-1.19548	971	1	ATCATTACTCGCACGTAAGT
SLC2A6	0.19577	0.999908	-0.900626	-1.19529	971	1	TTCAGAGCAGCCGAGTATCG
hsa-mir-4484	0.196173	0.999908	-0.900483	-1.1951	973	1	TTCATTGGAAAAAAAGGCAG
hsa-mir-548ae-1	0.196173	0.999908	-0.900341	-1.19491	973	1	TGGCAAAAACCGCAACTTAA
TPP2	0.196173	0.999908	-0.900199	-1.19473	973	1	CCCTCAGGCAAATATCATAT
HOXC11	0.196173	0.999908	-0.900057	-1.19454	973	1	AATAAGGGCAGCGCTTCTTG
NRAP	0.196173	0.999908	-0.899915	-1.19435	973	1	AACACTTACGCGTGACAGTA
GALNT10	0.196173	0.999908	-0.899773	-1.19416	973	1	GTCGTCGACCAGTACAATCT
TNFRSF11A	0.196576	0.999908	-0.89963	-1.19397	975	1	GCGCCATGGCCCCGCGCGCC
ARPP21	0.196576	0.999908	-0.899488	-1.19378	975	1	CATCGAGTGGCAGCTTATTT
FOXP3	0.196576	0.999908	-0.899346	-1.19359	975	1	TTCGAAGACCTTCTCACATC
NonTargetingControlGuideForHuman_0172	0.196979	0.999908	-0.899062	-1.19322	977	1	TAGGCGCCCGTAGCATTGGA
CLDN1	0.196979	0.999908	-0.89892	-1.19303	977	1	TAGCGTTACCTGGCATTGAC
ZNHIT1	0.19718	0.999908	-0.898777	-1.19284	978	1	GCCTCAGTTTGATGACGATG
KRTAP10-2	0.197583	0.999908	-0.898635	-1.19265	980	1	CCAGCGCCTGCACCAACTCC
ZNF366	0.198389	0.999908	-0.898351	-1.19227	984	1	CAAGTCGGAGCACGCCCCCG
SLC26A11	0.19859	0.999908	-0.898209	-1.19208	985	1	ATTTCCTACCCCGTCATTAA
KRTAP20-1	0.198792	0.999908	-0.898067	-1.1919	986	1	ATTTACTACAGCAACTATTA
PIK3C2G	0.199194	0.999908	-0.897924	-1.19171	988	1	AGGTTGTTCCATTCAGCTAG
PGF	0.199597	0.999908	-0.897782	-1.19152	990	1	AGCACGTTCGCTGCGAATGC
ZNF547	0.199799	0.999908	-0.89764	-1.19133	991	1	ACACGTGTACAGTCCCTGCT
DAO	0.200403	0.999908	-0.897498	-1.19114	994	1	AATAAACTCACCCGTAATCT
C14orf39	0.200403	0.999908	-0.897356	-1.19095	994	1	TACTTATGTCTTGCTCATAC
SMG5	0.201208	0.999908	-0.897214	-1.19076	998	1	ACGCACCTGGTTGCTGGTAT
TEKT1	0.201813	0.999908	-0.897071	-1.19058	1001	1	GCTCCACTGTGTCGTGCACC
NonTargetingControlGuideForHuman_0635	0.202014	0.999908	-0.896787	-1.1902	1002	1	TATTTCTCCTAAGTCTAGCG
STAU2	0.202417	0.999908	-0.896645	-1.19001	1004	1	GTAGGCAATGAAGTTGCTAC
AOC2	0.203223	0.999908	-0.896503	-1.18982	1008	1	GGTGACCCCACGCATTAGTC
TRIM64C	0.203223	0.999908	-0.896361	-1.18963	1008	1	GATGCATATATTTCTCGATG
hsa-mir-521-1	0.203424	0.999908	-0.896218	-1.18944	1009	1	CTCAGGCTGTGACCCTCCAA
MYO7A	0.203625	0.999908	-0.896076	-1.18925	1010	1	CAGGAGTTCGACGTGCCCAT
hsa-mir-3130-1	0.204028	0.999908	-0.895934	-1.18907	1012	1	CAACAGGCTGCACCGGAGAC
hsa-mir-3130-2	0.204028	0.999908	-0.895934	-1.18907	1012	1	CAACAGGCTGCACCGGAGAC
SPO11	0.205035	0.999908	-0.895792	-1.18888	1017	1	TAATATTGTCGACGACAGTC
hsa-mir-5186	0.206848	0.999908	-0.895508	-1.1885	1026	1	AGGAAAGGTTGGTAGAAATC
IGFL4	0.206848	0.999908	-0.895365	-1.18831	1026	1	GGAGTGGACCTACAACCCCT
METTL4	0.207251	0.999908	-0.895081	-1.18793	1028	1	GTGGTACACCAGTTGTCAGC
MORN4	0.208258	0.999908	-0.894797	-1.18756	1033	1	GCTCTGGGCCCGCTGAACAA
ABHD17C	0.208862	0.999908	-0.894655	-1.18737	1036	1	GACAGCGCTCGTACATCGCT
ADAM15	0.209668	0.999908	-0.894512	-1.18718	1040	1	TAATTGGGAGATCGTCCTGA
KCTD19	0.21007	0.999908	-0.89437	-1.18699	1042	1	CAGATCATCAAAGTGTATGT
NonTargetingControlGuideForHuman_0740	0.210675	0.999908	-0.894228	-1.1868	1045	1	CACCCTTATATTCAGTAACT
HIP1	0.210876	0.999908	-0.894086	-1.18661	1046	1	TTTGGTGTGGTACTCCATCT
FAM120B	0.210876	0.999908	-0.893944	-1.18642	1046	1	TGAGTAGACCCGCTGTCGAA
GLYR1	0.211078	0.999908	-0.893802	-1.18624	1047	1	CTCCTTACCTCGCTTGCGGT
WDR37	0.211279	0.999908	-0.893659	-1.18605	1048	1	CAGAAGTGTACTGCGAACCG
AKR7A2	0.211682	0.999908	-0.893517	-1.18586	1050	1	CACTTCCCAGCTAGCATAGT
SLC4A10	0.212085	0.999908	-0.893375	-1.18567	1052	1	CACGATGCCTGTGACGTCGA
MTMR4	0.212487	0.999908	-0.893233	-1.18548	1054	1	AGAGTACTATCCCAACTGTG
C7orf29	0.212487	0.999908	-0.893091	-1.18529	1054	1	GGCCGACCGACATTGACCAC
ZBED6CL	0.212487	0.999908	-0.893091	-1.18529	1054	1	GGCCGACCGACATTGACCAC
SSBP1	0.213092	0.999908	-0.892806	-1.18491	1057	1	CAAGTAAGTGCACACGATTC
SNCG	0.213092	0.999908	-0.892664	-1.18473	1057	1	GCAGGCCAACGCCGTGAGCG
NPNT	0.281019	0.999908	-0.751742	-1.18455	1290	2	GCCATACTGACAGTTTGCCA,TTCGATCTCATGTATATTGG
GAS2L3	0.213696	0.999908	-0.892522	-1.18454	1060	1	ATACCGCAAACTTCCTTCAC
UNC13A	0.214099	0.999908	-0.89238	-1.18435	1062	1	TGTCAAGAGCACGACCATCG
NonTargetingControlGuideForHuman_0805	0.214904	0.999908	-0.892238	-1.18416	1066	1	TCAGTATCGGCTGCTGGTAA
POM121L12	0.215106	0.999908	-0.892096	-1.18397	1067	1	TAGGGTCTCCTTCGCCCTCG
ZNF519	0.215911	0.999908	-0.891669	-1.18341	1071	1	CATCTCTATATAAATTCTGT
RAD54B	0.216717	0.999908	-0.891385	-1.18303	1075	1	GAATTCCCCTGCAACTGACT
hsa-mir-924	0.216918	0.999908	-0.891243	-1.18284	1076	1	CATCACAAGACTCTATTGAC
TRAF3	0.217724	0.999908	-0.890958	-1.18246	1080	1	TTGTGCAGAGCAGTTAATGC
C19orf81	0.218933	0.999908	-0.890816	-1.18227	1086	1	GCGCCACGACGACCTCCTGC
GLUD2	0.219738	0.999908	-0.890674	-1.18208	1090	1	CCGGGACGGCAGCAGCGCTT
PLK1S1	0.220141	0.999908	-0.89039	-1.18171	1092	1	ATAATCAGTCTGATACATGC
OR5M9	0.220544	0.999908	-0.890247	-1.18152	1094	1	AACCTGTAGCTCCTGACGAC
hsa-mir-106b	0.220947	0.999908	-0.890105	-1.18133	1096	1	AGCAGCAAGTACCCACAGTG
hsa-mir-4650-2	0.221148	0.999908	-0.889963	-1.18114	1097	1	ATGAGGCCTGACATATCTGC
HIST1H1T	0.221752	0.999908	-0.889821	-1.18095	1100	1	TCAGTGTCACAGGAACGAGT
GUCA1A	0.221752	0.999908	-0.889679	-1.18076	1100	1	ATCCCCGTTGACGTCAATCT
WDR31	0.285155	0.999908	-0.748898	-1.18007	1309	2	GACTCATCACAGCTGTGCAC,AGAGTATAGCCCAGCTCACA
TMEM5	0.223162	0.999908	-0.88911	-1.18001	1107	1	CCATTGAGCAGTCACATCGC
PLCZ1	0.223364	0.999908	-0.888826	-1.17963	1108	1	TGATACTCTACCATCACCAG
hsa-mir-4503	0.223565	0.999908	-0.888684	-1.17944	1109	1	TCTACATTGCCAAAAACCAA
WDR66	0.223968	0.999908	-0.888541	-1.17925	1111	1	TCCTGTTTACTATATTCGAG
GPR62	0.224371	0.999908	-0.888399	-1.17907	1113	1	TAGAGCGCGTCGCGCAGTCC
ENTPD1	0.224371	0.999908	-0.888257	-1.17888	1113	1	CTTTCAGTATGGGATTGTGC
C4orf3	0.224773	0.999908	-0.888115	-1.17869	1115	1	CGCTAAAGCCTCGCCGCTCC
NUP210	0.286678	0.999908	-0.747995	-1.17865	1316	2	CAGCGTGAAGTTAACGCGCG
NCKAP1	0.225176	0.999908	-0.887831	-1.17831	1117	1	AGAATTTGTACCCCATAGCA
NKTR	0.225378	0.999908	-0.887688	-1.17812	1118	1	ACTTACCTGAGCACAAGCAA
ASF1A	0.225378	0.999908	-0.887546	-1.17793	1118	1	AATAAATTCTTGTCCTCGAT
AJAP1	0.225982	0.999908	-0.887404	-1.17774	1121	1	TCCGACGAGTGTTCCCGCTT
MAPKBP1	0.225982	0.999908	-0.887262	-1.17756	1121	1	ATGACATGATCGTCAACGTG
ENOPH1	0.226183	0.999908	-0.88712	-1.17737	1122	1	TGAATGCCGCCCTCCACATG
PRSS37	0.226385	0.999908	-0.886835	-1.17699	1123	1	CCATTCAGATCGTCCGCTAC
CCNO	0.226788	0.999908	-0.886693	-1.1768	1125	1	GCATTTCACGCACGCTCGCG
hsa-mir-542	0.227392	0.999908	-0.886409	-1.17642	1128	1	GATTGATAACTGAAAGGTCT
2019-09-07	0.227996	0.999908	-0.886267	-1.17624	1131	1	CTACATTGATAGTAAATTTG
IRX4	0.228197	0.999908	-0.886125	-1.17605	1132	1	TGGAGGCTAAGCCGCGCATC
SGMS1	0.228399	0.999908	-0.885982	-1.17586	1133	1	TGATACCACCAGAGTCGCCG
GPR15	0.289943	0.999908	-0.746197	-1.17582	1331	2	TCTTCGACAGCTACATCCGC,TTGTGTGGCCAGTCGTATCC
STAC3	0.228802	0.999908	-0.88584	-1.17567	1135	1	TCTCTATCGGTTCAAAGCCC
CLIP4	0.229204	0.999908	-0.885698	-1.17548	1137	1	TCCTGGCATGATGCATCATT
CDK2	0.229809	0.999908	-0.885556	-1.17529	1140	1	TCATGGGTGTAAGTACGAAC
NonTargetingControlGuideForHuman_0035	0.230816	0.999908	-0.885272	-1.17491	1145	1	GTGCGATGTCGCTTCAACGT
MAPK15	0.23142	0.999908	-0.885129	-1.17473	1148	1	GTCGCGCTTAACCGCTTGTC
PUS3	0.231823	0.999908	-0.884987	-1.17454	1150	1	GCTTTCTACTAGTCGAGTCT
SLC6A9	0.232226	0.999908	-0.884845	-1.17435	1152	1	GCAGAGGAAGACGACCAACC
G3BP1	0.292338	0.999908	-0.745059	-1.17402	1342	2	CGCACTCTTTGATCCCGCTG
OR4F16	0.292338	0.999908	-0.744917	-1.1738	1342	2	TTCCTGAATGTATAGACAAC,CAGTCACTCCCTGTTCCAAC
OR4F21	0.292338	0.999908	-0.744917	-1.1738	1342	2	TTCCTGAATGTATAGACAAC,CAGTCACTCCCTGTTCCAAC
OR4F29	0.292338	0.999908	-0.744917	-1.1738	1342	2	TTCCTGAATGTATAGACAAC,CAGTCACTCCCTGTTCCAAC
OR4F3	0.292338	0.999908	-0.744917	-1.1738	1342	2	TTCCTGAATGTATAGACAAC,CAGTCACTCCCTGTTCCAAC
C1orf61	0.233434	0.999908	-0.884419	-1.17378	1158	1	CTCTCAAGTCCCCGATGTGA
HS3ST2	0.233635	0.999908	-0.884276	-1.17359	1159	1	CGAGCGACTCATCACTGACC
OSBPL2	0.234038	0.999908	-0.884134	-1.17341	1161	1	ATCCGCTGCAAGAAGCTCAG
FAM76A	0.234441	0.999908	-0.88385	-1.17303	1163	1	AGCAGCAGTGTGCATTTGAC
ARL14EP	0.29495	0.999908	-0.744412	-1.173	1354	2	AATGCCGCTGTGACCGCAAG
TRIAP1	0.234441	0.999908	-0.883708	-1.17284	1163	1	ACGACCAGTGCTTCAATCGC
CEP78	0.234642	0.999908	-0.883566	-1.17265	1164	1	ACATCTTTGTATCTTATCGC
OR4N4	0.235045	0.999908	-0.883423	-1.17246	1166	1	AAGTATAATAATGACACGAG
EXTL2	0.235448	0.999908	-0.883281	-1.17227	1168	1	AAGCACGTCTCTACTTCATC
hsa-mir-5584	0.236254	0.999908	-0.882855	-1.17171	1172	1	CATTTCCCTGTTATGGATCT
UHRF1BP1L	0.236657	0.999908	-0.882713	-1.17152	1174	1	GTACTTAGATTTATCTTGTC
hsa-mir-670	0.237462	0.999908	-0.882428	-1.17114	1178	1	AGGTTCACCACATACACTCA
TNIP2	0.238066	0.999908	-0.882144	-1.17076	1181	1	TGACGTCCTGTGCCGCTCCT
IFNA7	0.238469	0.999908	-0.88186	-1.17039	1183	1	TCAAGGCCCTCCTATTACGC
DCAF15	0.238872	0.999908	-0.881717	-1.1702	1185	1	CTGCGCCGTCTCCGTCCACT
EVPLL	0.239275	0.999908	-0.881575	-1.17001	1187	1	CACGTGTGCCCAGTCGACCT
ZNF225	0.239275	0.999908	-0.881433	-1.16982	1187	1	AAAGGCTTTAGTCGTAGATC
SMIM17	0.239678	0.999908	-0.881291	-1.16963	1189	1	ATCCCGCCTGCACCAAAGAC
ZNF235	0.240081	0.999908	-0.881149	-1.16944	1191	1	ACCAGATATGATATCCCAGT
FAM186B	0.240685	0.999908	-0.881007	-1.16925	1194	1	ACCTGTATGACATTCTCCGC
SLC2A2	0.240685	0.999908	-0.880864	-1.16907	1194	1	TGTGATCAATGCACCTCAAC
SFR1	0.241088	0.999908	-0.880722	-1.16888	1196	1	GATGGATTCGCAGAGGCCTG
MFN1	0.241088	0.999908	-0.88058	-1.16869	1196	1	GCTTTAGACAGTTAATCAAC
OR7C2	0.24149	0.999908	-0.880438	-1.1685	1198	1	AATGGTCAAGGTCTCAAGCA
TXNDC11	0.242095	0.999908	-0.880296	-1.16831	1201	1	GTGGACAGTCCATCGCTGCC
OR52L1	0.242699	0.999908	-0.880011	-1.16793	1204	1	TAAACACTCTGAGCACTCGC
ZNF543	0.242699	0.999908	-0.879869	-1.16774	1204	1	GCCACGTGAGGTATGACCGG
RAP1GAP	0.243907	0.999908	-0.879585	-1.16737	1210	1	TGCTGAATATGCCTGCTACA
ZBTB5	0.244109	0.999908	-0.879443	-1.16718	1211	1	TCCCCCCAGTGAGCGCGTTC
GRM2	0.244512	0.999908	-0.879301	-1.16699	1213	1	ATCTTCACCTATCTGCGTGC
ETV2	0.244914	0.999908	-0.879158	-1.1668	1215	1	AGCTGCTACGCGCCCCGTCG
ZNF837	0.245116	0.999908	-0.878874	-1.16642	1216	1	GTTCTGGATCCGCTCCGGAC
KIF26A	0.246123	0.999908	-0.87859	-1.16605	1221	1	CTGATGGCTTGTCGAAGGCC
ECI2	0.246123	0.999908	-0.878448	-1.16586	1221	1	CGTCCGTTCAGGAAGCTGCC
SCEL	0.246324	0.999908	-0.878305	-1.16567	1222	1	CCCACCTGTCCAATGCATCA
TBXAS1	0.246324	0.999908	-0.878163	-1.16548	1222	1	ATTCCTCCCAGGTACTATCT
REEP1	0.246526	0.999908	-0.878021	-1.16529	1223	1	AGGCTGGCCGTGTTTGCCGC
SYS1	0.24854	0.999908	-0.877452	-1.16454	1233	1	TGAGCTCCGTCCGCATGCAC
S1PR3	0.248741	0.999908	-0.87731	-1.16435	1234	1	TGGACCGCTCCGAGTTGTTG
WHSC1	0.249547	0.999908	-0.877026	-1.16397	1238	1	CAGTTTGGCATCGTGTGCGC
GPR149	0.24995	0.999908	-0.876884	-1.16378	1240	1	TCTGAAACCCCACGACGTTC
ETV5	0.250151	0.999908	-0.876599	-1.16341	1241	1	CGGTTATCAGACTGAAAATC
BECN1	0.305616	0.999908	-0.738234	-1.16327	1403	2	CCTGGACCGTGTCACCATCC,ATCTGCGAGAGACACCATCC
ACTR3C	0.250957	0.999908	-0.876315	-1.16303	1245	1	TCTCCAGGCAGTGCTGGCCT
OR2T35	0.251158	0.999908	-0.876173	-1.16284	1246	1	AGATTTGAACTGCACAGCCC
SLC10A1	0.251561	0.999908	-0.876031	-1.16265	1248	1	TGAATGGGGCAGACGCGTTG
TWISTNB	0.252165	0.999908	-0.875889	-1.16246	1251	1	TCGCATTATTAGTATTCTGC
CROT	0.252165	0.999908	-0.875746	-1.16227	1251	1	TTTGGCATAACTTGAACTAC
hsa-mir-4419a	0.252165	0.999908	-0.875604	-1.16208	1251	1	TCCCGAGTAGCTAAGACTAC
HBE1	0.252568	0.999908	-0.87532	-1.16171	1253	1	GACTCCTCGTTGTTTACCCC
ELP5	0.252971	0.999908	-0.875178	-1.16152	1255	1	CAACATCTCCAACTCGCGTC
COG8	0.253172	0.999908	-0.875036	-1.16133	1256	1	AGCCTCTTCAGCGCGATGGA
SYT2	0.253374	0.999908	-0.874751	-1.16095	1257	1	GATCCCCTTCGAGCAGATTC
CD14	0.253978	0.999908	-0.874609	-1.16076	1260	1	TCGCCCACGACACGTTGCGT
GIMAP5	0.253978	0.999908	-0.874467	-1.16057	1260	1	TTCTCTCACACTCCCGCACC
DDX11	0.254582	0.999908	-0.874183	-1.1602	1263	1	TGCTCCAGCCGCTCAGCCTC
SLAIN2	0.254582	0.999908	-0.87404	-1.16001	1263	1	ATACGAGGTATTCCTCCGTT
GPAT2	0.254783	0.999908	-0.873898	-1.15982	1264	1	AGGCTGTCACTCCATTCCTG
LYVE1	0.254783	0.999908	-0.873756	-1.15963	1264	1	ACCAGATGAGTTGTAACAAT
CCDC150	0.255186	0.999908	-0.873614	-1.15944	1266	1	GGAAACTACAGTGTCCAGAC
REC8	0.255589	0.999908	-0.873472	-1.15925	1268	1	CTCGTACCAGCACGTAATTG
MTHFS	0.255589	0.999908	-0.87333	-1.15907	1268	1	CTGTTGACGAGTCTTCGTAA
ST20-MTHFS	0.255589	0.999908	-0.87333	-1.15907	1268	1	CTGTTGACGAGTCTTCGTAA
ZNFX1	0.255589	0.999908	-0.873187	-1.15888	1268	1	AACACTCTGGCGATCCATTT
hsa-mir-4748	0.255992	0.999908	-0.873045	-1.15869	1270	1	GTAGGGCGTGGGGTTGGGTA
ATP2C2	0.256193	0.999908	-0.872903	-1.1585	1271	1	GGACGCCGTCAGCATCGCCA
CCDC23	0.310187	0.999908	-0.735139	-1.15839	1424	2	GTTCTGTCATGACTCTGTTG
ZBTB46	0.256798	0.999908	-0.872619	-1.15812	1274	1	GCACATGAAGCGCCACACGC
TMED6	0.311711	0.999908	-0.73475	-1.15778	1431	2	CAAACTATAACTACGTGAAC
MAML2	0.257603	0.999908	-0.872334	-1.15774	1278	1	ACGATAGCACTGTGCACTCT
CLCN1	0.257603	0.999908	-0.872192	-1.15756	1278	1	AACTCGCCCTCTACCTTGCC
hsa-mir-1260b	0.257805	0.999908	-0.87205	-1.15737	1279	1	TACTGTTCAGCAGGTGCTGC
LETM1	0.258006	0.999908	-0.871908	-1.15718	1280	1	GCCGTTCCTTGTGTTCGTGG
ANPEP	0.258207	0.999908	-0.871766	-1.15699	1281	1	CTACTGCAACGCTATCGCCC
C10orf105	0.258409	0.999908	-0.871624	-1.1568	1282	1	CCTCCCCATGCTCATCGCCC
ZNF280C	0.258812	0.999908	-0.871481	-1.15661	1284	1	CTTGCAGTCCTGAATATTTC
hsa-mir-4439	0.258812	0.999908	-0.871339	-1.15642	1284	1	CTGGTAAACTGATACCTTAG
CDK14	0.259416	0.999908	-0.871055	-1.15605	1287	1	CCCCCGTGTCACTGATCAGA
SSRP1	0.259819	0.999908	-0.870771	-1.15567	1289	1	TACAGAATGATGGTCGACTG
NAT14	0.26002	0.999908	-0.870628	-1.15548	1290	1	CCCTCATCTCCCGCACTGAC
hsa-mir-1286	0.260423	0.999908	-0.870486	-1.15529	1292	1	TTGCTCATTAGTGTCCTCTG
FAM196B	0.326171	0.999908	-0.637971	-1.15519	1441	3	ATATGATGCACGCCGTGTTC
KIF27	0.260624	0.999908	-0.870344	-1.1551	1293	1	TTCCTGGAATCTTGTCTTGA
NonTargetingControlGuideForHuman_0336	0.26143	0.999908	-0.87006	-1.15473	1297	1	GGATATTGAGTAAACCCGAT
TREM1	0.261833	0.999908	-0.869918	-1.15454	1299	1	GCTGTTCGATCGCATCCGCT
MYADML2	0.262437	0.999908	-0.869775	-1.15435	1302	1	GCTCGGGGGAACACTCCCGC
NR1I3	0.316935	0.999908	-0.732404	-1.15408	1455	2	GCTTTGCTCGCCGCAATGCC,GGCATTGCGGCGAGCAAAGC
TRAPPC13	0.263243	0.999908	-0.869491	-1.15397	1306	1	CTGACTTTACCACAGAATTT
SMAD2	0.263243	0.999908	-0.869349	-1.15378	1306	1	CTCCAGGTATCCCATCGAAA
AANAT	0.263646	0.999908	-0.869065	-1.15341	1308	1	CCTTCATCATCGGCTCGCTC
KIAA1109	0.263646	0.999908	-0.868922	-1.15322	1308	1	CCCTTTCTTAGGATTCAAGA
GPR137B	0.264451	0.999908	-0.868638	-1.15284	1312	1	CACGAAGAGCGTGTCATTAA
ARL14	0.264854	0.999908	-0.868496	-1.15265	1314	1	CAATGTGGAAATGATCGAGT
MAN2A1	0.266062	0.999908	-0.868354	-1.15246	1320	1	ATTCCGTGTATTCACAGTAG
PCGF5	0.266062	0.999908	-0.868212	-1.15227	1320	1	AGGCATTCCGTCACTGTTGT
ENDOU	0.267674	0.999908	-0.867927	-1.1519	1328	1	ACTAACCGTGGTCACTACAC
ACAA1	0.267674	0.999908	-0.867785	-1.15171	1328	1	ATTCACGTCCTTGAGAACCG
TCN1	0.268681	0.999908	-0.867643	-1.15152	1333	1	TAACTACTACCAGCTCAGCC
S100A14	0.268681	0.999908	-0.867501	-1.15133	1333	1	GAACTTTCACCAGTACTCCG
TULP1	0.269285	0.999908	-0.867216	-1.15095	1336	1	CGTTGTCAAAGACCGTGAAG
NABP2	0.270091	0.999908	-0.86679	-1.15039	1340	1	GACATTATCCGGCTCACCAA
FAM65B	0.270695	0.999908	-0.866648	-1.1502	1343	1	CTTGCCTGGATCGCCTTTCC
CCDC153	0.271299	0.999908	-0.866506	-1.15001	1346	1	ACCTACCTAGCTGCCCCCGA
APOC2	0.320418	0.999908	-0.729769	-1.14993	1471	2	TAGCCCGACCTTCCTCACCC
C3orf83	0.271903	0.999908	-0.866363	-1.14982	1349	1	CCCACCCTTCTCCGTCTCGC
LOC100129480	0.271903	0.999908	-0.866363	-1.14982	1349	1	CCCACCCTTCTCCGTCTCGC
PSEN2	0.272709	0.999908	-0.866079	-1.14944	1353	1	CATCATGATCAGTGCGCTCA
CD300A	0.27291	0.999908	-0.865937	-1.14925	1354	1	TTTCCTATGTGACAAGATTG
SIGLEC7	0.273313	0.999908	-0.865795	-1.14907	1356	1	CAGAGAGTTCTGAGCTCGAC
ACSM4	0.273515	0.999908	-0.865653	-1.14888	1357	1	AATACAATGGACTCCACCGC
P4HB	0.274723	0.999908	-0.865368	-1.1485	1363	1	AGCCGCGCACGCCGTACTGC
RPL36AL	0.274723	0.999908	-0.865226	-1.14831	1363	1	GATCATAGCGCCTCCTTCCC
TMEM253	0.275932	0.999908	-0.864942	-1.14793	1369	1	GCTCTTGATAGTGCAGACTC
GRB2	0.322595	0.999908	-0.728405	-1.14778	1481	2	ATTATGTCACCCCCGTGAAC
C11orf54	0.276334	0.999908	-0.8648	-1.14774	1371	1	GACTCTCGGGTTCAATTCTG
SLC9A3R2	0.27714	0.999908	-0.864657	-1.14756	1375	1	CGAGGTCAACGGCGTCAACG
LIPT1	0.27714	0.999908	-0.864515	-1.14737	1375	1	AGGAACAGTCTACCATGATA
ZNF428	0.278147	0.999908	-0.864373	-1.14718	1380	1	ACCCGTGAGCCAGCTGAGAC
hsa-mir-492	0.278348	0.999908	-0.864231	-1.14699	1381	1	GCAGATCAACAATGCTCAAC
ZNF133	0.278751	0.999908	-0.864089	-1.1468	1383	1	TAAAGCCTCGCCCGCACTCT
SVIP	0.279154	0.999908	-0.863947	-1.14661	1385	1	TCTACTCACCAGGTCCGGCG
FLYWCH2	0.280161	0.999908	-0.863804	-1.14642	1390	1	ACAGTGCACACCCTTGCGCT
ERGIC1	0.28137	0.999908	-0.863662	-1.14624	1396	1	TCGTAGCGGAACCAGATTGC
USF1	0.281974	0.999908	-0.86352	-1.14605	1399	1	ACGTACTTGACGTTGGGGTC
DSG1	0.282578	0.999908	-0.863378	-1.14586	1402	1	TAACAGTGAATTCCGAATCC
ZNF705B	0.324771	0.999908	-0.727143	-1.14579	1491	2	CTCCAGCTGCAAAATTATAT,TTCCCACATAGAAGACAAGC
SLC26A10	0.283182	0.999908	-0.863236	-1.14567	1405	1	TTGTCCCTCCCGCGCCAGAT
hsa-mir-103a-2	0.283585	0.999908	-0.862951	-1.14529	1407	1	TGCTTGACCTGAATGCTACA
hsa-mir-103b-2	0.283585	0.999908	-0.862951	-1.14529	1407	1	TGCTTGACCTGAATGCTACA
CGA	0.283988	0.999908	-0.862809	-1.1451	1409	1	GGTCACGCACCCTGCACATC
COX7A1	0.284794	0.999908	-0.862667	-1.14491	1413	1	GCTTCTGTTTCTCGCGCACT
KRT27	0.284995	0.999908	-0.862525	-1.14473	1414	1	CAGCAGATCTCTGACGACGC
C5orf38	0.285398	0.999908	-0.862241	-1.14435	1416	1	AATTCGCAACCAAGGCGCCC
NonTargetingControlGuideForHuman_0895	0.285398	0.999908	-0.862098	-1.14416	1416	1	GTTAGGAATAAAAGCTTTGA
TTBK1	0.286203	0.999908	-0.861956	-1.14397	1420	1	GCGATCCTTGACCACGTAGT
NonTargetingControlGuideForHuman_0650	0.286606	0.999908	-0.861814	-1.14378	1422	1	CACATGGGGTACAGCACACC
ARV1	0.286606	0.999908	-0.861672	-1.14359	1422	1	CGTGTTGAGTGGCTTACTGC
CHIC1	0.286606	0.999908	-0.86153	-1.1434	1422	1	TTTCTTAGCTTGCTTTGCAC
GTPBP1	0.286808	0.999908	-0.861245	-1.14303	1423	1	GGGCCGCGTGCGTGATTACC
C1orf50	0.286808	0.999908	-0.861103	-1.14284	1423	1	CTAAGGGGTCCCCGGCCCGG
SEZ6L	0.287009	0.999908	-0.860961	-1.14265	1424	1	ATGTCAGCATCTTAGCGCCC
ZNF789	0.287815	0.999908	-0.860819	-1.14246	1428	1	CCCACCTGGGCAAGCACTAC
GH2	0.288016	0.999908	-0.860677	-1.14227	1429	1	CAACGTCTATCGCCACCTGA
ZNF599	0.288822	0.999908	-0.860535	-1.14208	1433	1	GACATCAGCCATATAACGAC
FOXD2	0.289023	0.999908	-0.860392	-1.1419	1434	1	CACCACGTCTATGTCTGCGT
ELMSAN1	0.289023	0.999908	-0.86025	-1.14171	1434	1	ACTTACGGCTCGATGCTCAC
TIMM23	0.29003	0.999908	-0.859966	-1.14133	1439	1	TCTGTCTCCTTATTTAAATG
NonTargetingControlGuideForHuman_0075	0.290232	0.999908	-0.859824	-1.14114	1440	1	GTACCATACCGCGTACCCTT
ENPP7	0.290634	0.999908	-0.859682	-1.14095	1442	1	GTACACGTGGACGCTCTCAA
DOCK2	0.290836	0.999908	-0.859539	-1.14076	1443	1	GCACCACATCGCCGATCTGC
WNT8A	0.290836	0.999908	-0.859397	-1.14057	1443	1	CTACCTTGGGACCTGTTATC
BRD7	0.291239	0.999908	-0.858971	-1.14001	1445	1	GTTATTCCAACCTTCTTGTT
TBATA	0.291641	0.999908	-0.858686	-1.13963	1447	1	ATCTGCGGCGGCCGACAGCC
TRAK1	0.291843	0.999908	-0.858544	-1.13944	1448	1	AGGCTAATGATCTCGACTTC
RPP30	0.292246	0.999908	-0.85826	-1.13907	1450	1	CACAACTTTGCCAATTGTAC
EPSTI1	0.292649	0.999908	-0.857976	-1.13869	1452	1	GCCTGGCTTAGTTGCGGAGC
NonTargetingControlGuideForHuman_0134	0.293454	0.999908	-0.857691	-1.13831	1456	1	CGGCCGCATCCTGTTATATT
RAP2B	0.293454	0.999908	-0.857549	-1.13812	1456	1	CGCGCTCGTACCGCTTCACG
LHFPL1	0.294058	0.999908	-0.857407	-1.13793	1459	1	AGGTGCAACTACCCTGTGCG
BLOC1S6	0.336961	0.999908	-0.722025	-1.13773	1547	2	AGTTGTATTGTTAGACACAC,GTGTGTCTAACAATACAACT
GADL1	0.337832	0.999908	-0.721749	-1.13729	1551	2	CGAGCCACCCCATAAACTAT
OR4C11	0.295468	0.999908	-0.856838	-1.13718	1466	1	TTGTGACCATCAAGTCCAGC
OR4C6	0.295468	0.999908	-0.856696	-1.13699	1466	1	TATCTTAATTGCGTCCTACA
PDZD9	0.29567	0.999908	-0.856554	-1.1368	1467	1	GGTGATGTTCTGATTAGTGT
APOA5	0.296274	0.999908	-0.85627	-1.13642	1470	1	CTTCACTCGCGCCATCGACC
PRSS46	0.296677	0.999908	-0.855985	-1.13605	1472	1	CGTTGGTCTGACCGCAGGCC
KCNJ3	0.340009	0.999908	-0.720927	-1.136	1561	2	GTTCAGTTTGCATGCTTCGC
DGKA	0.296878	0.999908	-0.855843	-1.13586	1473	1	CGCCATCCTCGAAGAGCTTT
G0S2	0.29708	0.999908	-0.855701	-1.13567	1474	1	CAGACGTCTGGCGGCCGTGA
PMM1	0.297885	0.999908	-0.855274	-1.1351	1478	1	ATACTGCACCGTCCCGTTCT
HAPLN1	0.298288	0.999908	-0.855132	-1.13491	1480	1	AGATTGTAGCGCCCCAGTCG
hsa-mir-1471	0.298288	0.999908	-0.85499	-1.13473	1480	1	ACAGCTGGCTCTAATTTGAG
HMBS	0.298489	0.999908	-0.854848	-1.13454	1481	1	AAAGATGAGAGTGATTCGCG
CYP3A43	0.298892	0.999908	-0.854706	-1.13435	1483	1	AGTGGTGCTAGTTGTGTCAT
RHBDD1	0.299094	0.999908	-0.854564	-1.13416	1484	1	TTAAAGTAGTATTGCCGTCC
C15orf27	0.299094	0.999908	-0.854421	-1.13397	1484	1	CTCGCAGCTCCTGTCAAATC
ANKH	0.299295	0.999908	-0.854279	-1.13378	1485	1	CTCACCATTGCGTCCATGAA
hsa-mir-216a	0.299295	0.999908	-0.854137	-1.13359	1485	1	GTTCATACAATCCCTCACAG
TMEM179B	0.299295	0.999908	-0.853995	-1.1334	1485	1	CTCAGCTATAGCCGTCTTCC
hsa-mir-3620	0.299899	0.999908	-0.853568	-1.13284	1488	1	GGCTGGGCTGGGCTGGGCCA
ARHGAP25	0.300101	0.999908	-0.853426	-1.13265	1489	1	CAGGGCTGCATGTATCTACC
ASAH1	0.300906	0.999908	-0.853284	-1.13246	1493	1	TTGCGTCGCCTTAGTCCTCC
TLX1NB	0.301309	0.999908	-0.853142	-1.13227	1495	1	CGCTTTAATTCTCCGTCTGT
LOC650293	0.301913	0.999908	-0.853	-1.13208	1498	1	GAGGAACCTCCTCAGTATCC
C3orf62	0.302518	0.999908	-0.852858	-1.1319	1501	1	CCTTCTCGCTGCCCGTGCAC
DYRK1B	0.302719	0.999908	-0.852715	-1.13171	1502	1	CATGACTACATCGTGCGCAG
OR1G1	0.303122	0.999908	-0.852431	-1.13133	1504	1	GGCATTCCTCTTGGCGGTCA
hsa-mir-4295	0.303122	0.999908	-0.852289	-1.13114	1504	1	AACCGAAGTGGTCTTGCCAC
MTRNR2L6	0.303122	0.999908	-0.852147	-1.13095	1504	1	AGTACTACGTCCACTGCGCC
ZFAT	0.303927	0.999908	-0.852005	-1.13076	1508	1	GAGAGGAGTTCCGACTGATT
SLC25A47	0.303927	0.999908	-0.851862	-1.13057	1508	1	CTACCCCCTGGACACGGTGA
NonTargetingControlGuideForHuman_0793	0.304532	0.999908	-0.85172	-1.13039	1511	1	ATTTTCGAAAGCTTAGGCCA
MORN2	0.304935	0.999908	-0.851578	-1.1302	1513	1	TACCACTCCATTCTAGTCCT
SPANXA1	0.350239	0.999908	-0.717047	-1.12988	1608	2	TACCATCTCGTTGGCCTCGT
SPANXA2	0.350239	0.999908	-0.717047	-1.12988	1608	2	TACCATCTCGTTGGCCTCGT
KCNC1	0.305337	0.999908	-0.851294	-1.12982	1515	1	TGCGCTCGCTCTCGTCCCCT
PTHLH	0.305539	0.999908	-0.851152	-1.12963	1516	1	ATCGAGCTCCAGCGACGTTG
TMEM92	0.350892	0.999908	-0.71686	-1.12959	1611	2	TTACAGGATGAGACCACATT
KIF13A	0.305539	0.999908	-0.851009	-1.12944	1516	1	AGCAGCTGGGCCTTATTCCA
TFDP3	0.305942	0.999908	-0.850867	-1.12925	1518	1	GACCTGACCAACATTGCGAT
hsa-mir-548j	0.306546	0.999908	-0.850441	-1.12869	1521	1	GCAGCCAGTGAATAGTTAGC
ZNF260	0.306949	0.999908	-0.850299	-1.1285	1523	1	GAGATATGCTTTGCCGTTAA
FAR2	0.353287	0.999908	-0.716053	-1.12832	1622	2	TACGCTTTGACGACACTCTC,TAAGGCATACCTTACTGTCT
DNAJC30	0.30715	0.999908	-0.850014	-1.12812	1524	1	CGTCAAAGTTGAACATCGTG
TUBGCP6	0.307351	0.999908	-0.849872	-1.12793	1525	1	CGCAGGCCCGGTAATACTGC
WASL	0.307956	0.999908	-0.84973	-1.12774	1528	1	TACCAGATTTCCTTTGTCGA
SERPINB6	0.307956	0.999908	-0.849588	-1.12756	1528	1	GTTTGACAAGGAGAACACCG
ARRB2	0.308157	0.999908	-0.849303	-1.12718	1529	1	GACTACCTGAAGGACCGCAA
FBXL12	0.308359	0.999908	-0.849161	-1.12699	1530	1	CGCGTACCGTGTAGAGCGTC
hsa-mir-658	0.354593	0.999908	-0.7152	-1.12697	1628	2	CCGCAACCACGGCAACCGAG,TCGTGCTGTCAGCGAGCTGG
ABLIM3	0.308359	0.999908	-0.849019	-1.1268	1530	1	CCACTTACTGCTAGTGTTCA
LRFN5	0.308761	0.999908	-0.848877	-1.12661	1532	1	ATCTGACAGACACAACGCTT
IRF2BP1	0.309366	0.999908	-0.848735	-1.12642	1535	1	AGTACCTCGAATATGAACGC
DNAH14	0.309768	0.999908	-0.848593	-1.12624	1537	1	CCACATACCTGTTCTATCAT
CCSER1	0.310373	0.999908	-0.848308	-1.12586	1540	1	GCTTAACAGAACGACGAGTT
SCN11A	0.310775	0.999908	-0.848166	-1.12567	1542	1	TTACGCTATTCCAATGACAA
TRIM50	0.311178	0.999908	-0.848024	-1.12548	1544	1	GGCAGCGCAGCTCGGCATCC
DAPK2	0.311178	0.999908	-0.847882	-1.12529	1544	1	CATGTTTGGACTCCTCATTG
ABCB9	0.357423	0.999908	-0.714062	-1.12518	1641	2	GCAATTAGCTCATTTGCCGC,AGCGGAAGAGACAGTTTCGA
FAM167A	0.311581	0.999908	-0.84774	-1.1251	1546	1	CACCACCCGATGACCACCTC
IPO7	0.311782	0.999908	-0.847597	-1.12491	1547	1	ATGATCGACCTGAGTTACCA
BIN2	0.311984	0.999908	-0.847455	-1.12473	1548	1	TCAGGTCCTTGTACAGCTTG
AARS	0.312185	0.999908	-0.847313	-1.12454	1549	1	TCACACCTTCTTCGAGATGC
BAG4	0.31279	0.999908	-0.847171	-1.12435	1552	1	TCCAGGATATCCGCCTTCAC
ADM2	0.312991	0.999908	-0.847029	-1.12416	1553	1	GTCTTCGGGGGCCCGAGTGT
FBXO25	0.313394	0.999908	-0.846887	-1.12397	1555	1	CGCCACTCAATGAAGTTAAC
hsa-mir-630	0.313797	0.999908	-0.846744	-1.12378	1557	1	ATGACCTAGTATTCTGTACC
SYT15	0.314401	0.999908	-0.846602	-1.12359	1560	1	AGTGAGACCGACTTCCCCGA
ACTR6	0.314804	0.999908	-0.84646	-1.1234	1562	1	ACTCTTAACCAATCATCTAA
hsa-mir-549a	0.315609	0.999908	-0.846034	-1.12284	1566	1	TATATCCCAGGCACTGTGCT
AP3S2	0.316213	0.999908	-0.845891	-1.12265	1569	1	TTAGGTGCACTACATCCTCC
ZNF620	0.316616	0.999908	-0.845749	-1.12246	1571	1	CTCACTCACCTGGCGCCAAG
PNLIP	0.317422	0.999908	-0.845607	-1.12227	1575	1	CCAACCTGTGATGCGTCCAA
VSIG1	0.317422	0.999908	-0.845323	-1.1219	1575	1	GGTTTCGTGAACGTGACTGT
hsa-mir-6130	0.317825	0.999908	-0.845181	-1.12171	1577	1	GAATAATGCTGCAATGAATG
hsa-mir-544a	0.31863	0.999908	-0.844896	-1.12133	1581	1	TGCTTTTTAACAAGATCCCT
POU3F2	0.318832	0.999908	-0.844754	-1.12114	1582	1	TGCGATCTTGTCTATGCTCG
hsa-mir-4475	0.318832	0.999908	-0.844612	-1.12095	1582	1	TCTAAATGACTCATAGTCAA
BTBD10	0.319033	0.999908	-0.84447	-1.12076	1583	1	TATCATAGGATGTTTGGATC
CNOT6	0.319436	0.999908	-0.844328	-1.12057	1585	1	CCAGTTGGCCTTGTCCTATC
CASP3	0.319637	0.999908	-0.844185	-1.12039	1586	1	ATGTCGATGCAGCAAACCTC
TSHB	0.319839	0.999908	-0.844043	-1.1202	1587	1	ACATCGCTTGCCCACATGTA
hsa-mir-6815	0.320443	0.999908	-0.843901	-1.12001	1590	1	GTGATGGGAAATGACTCCTC
ZNF334	0.320846	0.999908	-0.843759	-1.11982	1592	1	TGAAGTTCACAGTCAGGTCC
CLDN17	0.321652	0.999908	-0.843617	-1.11963	1596	1	TCCTTGATCGCCCTGCTTAT
CCDC60	0.322256	0.999908	-0.843475	-1.11944	1599	1	TCACTCACCGGCTTCGTATA
TOE1	0.322659	0.999908	-0.843332	-1.11925	1601	1	GTGCATTGAGGAACGTTACA
OR12D2	0.32286	0.999908	-0.84319	-1.11907	1602	1	GTCCATGTTGTTCGCCGTGA
2019-09-12	0.365477	0.999908	-0.70999	-1.11876	1678	2	GCAATACGAGCAGTACCTGC
HLA-DPB1	0.323464	0.999908	-0.842906	-1.11869	1605	1	CTGTTCCAGTACTCCGCAGC
F7	0.323464	0.999908	-0.842764	-1.1185	1605	1	CCGCGTCCTTGAAGATCTCC
WDFY1	0.323867	0.999908	-0.842622	-1.11831	1607	1	ATATCCGTCTGCTGTCATGA
ANKHD1-EIF4EBP3	0.324068	0.999908	-0.842479	-1.11812	1608	1	AGTGTATGCGTTGGCACACG
TGS1	0.32427	0.999908	-0.842337	-1.11793	1609	1	AGCCATACTTGAATCCTAGA
AGXT2	0.324673	0.999908	-0.842195	-1.11774	1611	1	AGACGGTGCTTGTATGCCAC
PPP1R14A	0.367436	0.999908	-0.709175	-1.11748	1687	2	GCGTCACCGTCAAGTATGAC
OGDHL	0.325076	0.999908	-0.841911	-1.11737	1613	1	ACCTCATGGAGCGCACTAGC
FEM1C	0.367436	0.999908	-0.709034	-1.11726	1687	2	TCGAAACACGCAGCTCGAAG
GLYAT	0.325277	0.999908	-0.841769	-1.11718	1614	1	GATCACCAGAACTCATCAAC
LOC154872	0.325277	0.999908	-0.841626	-1.11699	1614	1	GCTTCATCCTGCGTGATTTC
UPF1	0.325277	0.999908	-0.841484	-1.1168	1614	1	CGACTACGACAAGAAGCTGA
TRIM32	0.368306	0.999908	-0.708655	-1.11666	1691	2	GCGGACACCATTGATGCTAC
PTK2	0.325277	0.999908	-0.841342	-1.11661	1614	1	CATTGCAGCCCTTGTCCGTT
NonTargetingControlGuideForHuman_0622	0.325478	0.999908	-0.8412	-1.11642	1615	1	ATACAATACTTTGGCGCATA
LGI3	0.325881	0.999908	-0.841058	-1.11623	1617	1	GAGTTCGATTGCATCACCAC
hsa-mir-3613	0.326284	0.999908	-0.840916	-1.11605	1619	1	GCCGTGCAATTAAGATGGTT
YTHDC2	0.369177	0.999908	-0.708233	-1.11599	1695	2	TTGTACTCAACCAAGACGAT,GACTGTGACACATGTTATCG
FAM111B	0.326284	0.999908	-0.840773	-1.11586	1619	1	ATAATATGTAAGCTGTTCGC
hsa-mir-5591	0.326284	0.999908	-0.840631	-1.11567	1619	1	TATAGTGGGAGCTAAGCTAT
USP20	0.326687	0.999908	-0.840347	-1.11529	1621	1	GGATTCTCCGCAGCCAACAT
XPNPEP2	0.32709	0.999908	-0.840063	-1.11491	1623	1	CTGAGTCCAGTAGCGACTGT
TBX10	0.327291	0.999908	-0.83992	-1.11473	1624	1	CTGAGGGTGCAAGTATGCCG
RFX6	0.327895	0.999908	-0.839494	-1.11416	1627	1	TATTACCACTCCGTTTATTC
KLHDC1	0.328298	0.999908	-0.83921	-1.11378	1629	1	GCGCATACATGTGCAGTTCT
ATP6V0C	0.328499	0.999908	-0.839067	-1.11359	1630	1	CAAGAGCGGTACCGGCATTG
ZNF705A	0.371572	0.999908	-0.706669	-1.11353	1706	2	TGTAGCTATTGACTTCACCC,CTCCAGCTGCAAAATTATAT
ZNF705D	0.371572	0.999908	-0.706669	-1.11353	1706	2	TGTAGCTATTGACTTCACCC,CTCCAGCTGCAAAATTATAT
USP22	0.329104	0.999908	-0.838925	-1.1134	1633	1	GCAACCCGCCTGTGAAGATC
PDE4D	0.329104	0.999908	-0.838783	-1.11322	1633	1	CAAGATAGGGTTCCATTCCG
MDH2	0.372007	0.999908	-0.706242	-1.11286	1708	2	TGGTGTTGAACAGGTCGTCC,GATCTGCGTCATTGCCAATC
CTRB1	0.330312	0.999908	-0.838499	-1.11284	1639	1	CACCTGCAGGGACACCTGCC
CTRB2	0.330312	0.999908	-0.838499	-1.11284	1639	1	CACCTGCAGGGACACCTGCC
GPR162	0.330715	0.999908	-0.838357	-1.11265	1641	1	CTCCCACACTGTGCGCACGT
NELFA	0.331521	0.999908	-0.838072	-1.11227	1645	1	GTCGGCGACCATGAGCACCC
MOGAT2	0.331923	0.999908	-0.83793	-1.11208	1647	1	GCCCGCAATGTAGTTCCGAG
LMO3	0.332125	0.999908	-0.837788	-1.1119	1648	1	CCGGTATCTTCTAAAGGCAC
hsa-mir-4639	0.375272	0.999908	-0.705593	-1.11183	1723	2	AAAGATATGCCTGCAAAGCA
HMGN5	0.332528	0.999908	-0.837504	-1.11152	1650	1	TCTGTGTAGGCTGCAGGTCA
ARHGAP39	0.332528	0.999908	-0.837361	-1.11133	1650	1	TCTCGCTGGTGCGCTTGATG
TPMT	0.334542	0.999908	-0.836651	-1.11039	1660	1	TCAGTCCACTCTTGCCTTTA
GALR3	0.334945	0.999908	-0.836508	-1.1102	1662	1	GTACGCCAGCAGCTTTACGC
SETD4	0.334945	0.999908	-0.836366	-1.11001	1662	1	GATGAGTCAAACATCCCTGC
PM20D1	0.335146	0.999908	-0.836224	-1.10982	1663	1	CTTTATCCAGCATGAAGTCG
OR4K15	0.33575	0.999908	-0.836082	-1.10963	1666	1	CTCCTCTGCAAGCATGGCGA
HDAC11	0.336153	0.999908	-0.83594	-1.10944	1668	1	CCAGCACTCACCCACGTTGA
CCDC97	0.336354	0.999908	-0.835798	-1.10925	1669	1	CAGCATAGCGCCGGTTACGC
hsa-mir-4285	0.336354	0.999908	-0.835655	-1.10907	1669	1	TCCGACTCATCAATATTTTA
SOGA2	0.336556	0.999908	-0.835513	-1.10888	1670	1	ACACCCTCCATGAGCGAACC
TIGD7	0.33716	0.999908	-0.835371	-1.10869	1673	1	TGAAGCTCCACGCCTCTTAC
STXBP5	0.37919	0.999908	-0.703398	-1.10838	1741	2	TCTCAGGCTACGTCATTATG,TCTACCTTTCCCTCGTCCAT
PCNXL2	0.337563	0.999908	-0.835087	-1.10831	1675	1	CTACACCTCATGTTTGACAA
FBN2	0.338369	0.999908	-0.834802	-1.10793	1679	1	CATCACAGGCCCAACGTGTG
ZSCAN2	0.338973	0.999908	-0.834518	-1.10756	1682	1	ATCCAGCCTTAACACGCATC
CCR5	0.340181	0.999908	-0.834376	-1.10737	1688	1	TCTGAACTTCTCCCCGACAA
RAB11FIP2	0.340584	0.999908	-0.834092	-1.10699	1690	1	GAGTGCCGTATGAACCATCC
RHPN2	0.381149	0.999908	-0.702403	-1.10681	1750	2	TCCTCATCCGCACGGCTTTC,GACCGACGCGCTGTTGCCCG
OR9I1	0.340987	0.999908	-0.833949	-1.1068	1692	1	CAACCCACTGCTCTATACCG
hsa-mir-5583-1	0.341188	0.999908	-0.833807	-1.10661	1693	1	AAACTAATATACCCATATTC
hsa-mir-5583-2	0.341188	0.999908	-0.833807	-1.10661	1693	1	AAACTAATATACCCATATTC
GUK1	0.341793	0.999908	-0.833381	-1.10605	1696	1	CATCGAGCATGCCGAGTTCT
PLA2G4B	0.382238	0.999908	-0.701834	-1.10591	1755	2	TCAGTGAGAAGCTCTCGCGC,TGTTCTTGACCGTGCGTGTC
WDR61	0.342195	0.999908	-0.833239	-1.10586	1698	1	GCTCAGCGTGCCAGCCAAAT
FCRL1	0.342397	0.999908	-0.833096	-1.10567	1699	1	TTTCAGGAAGACGTTCAGCC
AMBP	0.342598	0.999908	-0.832954	-1.10548	1700	1	TGCTCACCGCCAACGAGTGC
CLVS1	0.343404	0.999908	-0.83267	-1.1051	1704	1	GAAGCATACGTCCTCGAATC
HDC	0.343605	0.999908	-0.832528	-1.10491	1705	1	ATTGAACGAATCATCATGCC
CDYL2	0.343807	0.999908	-0.832386	-1.10473	1706	1	TGACGTGAATCACGCTACAC
ATHL1	0.344411	0.999908	-0.831959	-1.10416	1709	1	GGAGTACCGCATCCGCACGC
ABHD2	0.345418	0.999908	-0.831817	-1.10397	1714	1	GATACATTCCACCGTTGATC
MFSD7	0.345418	0.999908	-0.831675	-1.10378	1714	1	CTTCATCACGTTTGGGATCC
MAP3K7CL	0.346224	0.999908	-0.831533	-1.10359	1718	1	AGAATTAGACCAGCAGCTAC
TAS2R3	0.346425	0.999908	-0.831248	-1.10322	1719	1	TGACATGATGGGACTCACCG
ABL2	0.346626	0.999908	-0.831106	-1.10303	1720	1	TCTCTGTGGTGCGCCCCGCC
MYL6B	0.346626	0.999908	-0.830964	-1.10284	1720	1	TCCACAGATCGAGTTTAACA
ZNF558	0.386591	0.999908	-0.699801	-1.10271	1775	2	TTAGGGCTTGGTAACCTTCG
CCDC47	0.346626	0.999908	-0.830822	-1.10265	1720	1	TCAGTGATTATGACCCGTTG
OR4L1	0.386591	0.999908	-0.699671	-1.1025	1775	2	TTGCATTGAAACATACACCC
GPRC5A	0.346828	0.999908	-0.83068	-1.10246	1721	1	TCAGTCTGACCAAGCTCGTC
OTX1	0.347029	0.999908	-0.830537	-1.10227	1722	1	TACGGAGCGCTGCATACACG
PCDH11Y	0.347432	0.999908	-0.830395	-1.10208	1724	1	GCATGCCTGTACGACGATCC
RASGRP1	0.347432	0.999908	-0.830253	-1.1019	1724	1	GCATACATACCGATATCCTC
C2CD4D	0.347432	0.999908	-0.830111	-1.10171	1724	1	GAGCCGAAGGGCGACGAGTC
RPTOR	0.347432	0.999908	-0.829969	-1.10152	1724	1	GACCACGCCCTGTGCACGCT
EPB49	0.347633	0.999908	-0.829827	-1.10133	1725	1	CGGGCGAGCTCCGTGCTGCA
PFKFB2	0.348036	0.999908	-0.829684	-1.10114	1727	1	CCGACTCTGATCGTTATGAT
hsa-mir-3918	0.348439	0.999908	-0.829542	-1.10095	1729	1	CCCATGGCTTAACCGCCTAT
COMMD4	0.34864	0.999908	-0.8294	-1.10076	1730	1	CCAGCGTGCTGATTTCTGCC
TRMT10C	0.34864	0.999908	-0.829258	-1.10057	1730	1	CCAATGTTATGACTACTTTC
NonTargetingControlGuideForHuman_0782	0.348842	0.999908	-0.829116	-1.10039	1731	1	CCAAAAAGATGAATATCTCG
BPNT1	0.349245	0.999908	-0.828974	-1.1002	1733	1	ATATGCTCATCTGTGCCAAT
SECISBP2L	0.349446	0.999908	-0.828831	-1.10001	1734	1	ACTGAGCGTCCAAGTCAGCT
SNRPA	0.349446	0.999908	-0.828689	-1.09982	1734	1	AATGATATCTGAGTCGGTCT
hsa-mir-1273f	0.349849	0.999908	-0.828547	-1.09963	1736	1	AAGGACTGACTCTATGGCCC
PTPRG	0.349849	0.999908	-0.828405	-1.09944	1736	1	TGCCGTGTCTATTCTCGTGC
HES3	0.35005	0.999908	-0.828263	-1.09925	1737	1	TCGGCGCAGCGACTCGACGC
RORA	0.35005	0.999908	-0.828121	-1.09907	1737	1	TCATTGTCTTCGAACTGGAC
PPP1R9A	0.350252	0.999908	-0.827978	-1.09888	1738	1	GCAACCTCGCTCACTTGTCC
CPT1A	0.350856	0.999908	-0.827694	-1.0985	1741	1	TACGTAATTTGTAGCCCACC
NonTargetingControlGuideForHuman_0441	0.351057	0.999908	-0.82741	-1.09812	1742	1	TTTATGCATTTAATACGCCG
GNG13	0.351662	0.999908	-0.827125	-1.09774	1745	1	TCTTCATCAGGTCGGGGTTC
RRP36	0.351863	0.999908	-0.826983	-1.09756	1746	1	CCGGGAGCTAACTACCGCGC
IVL	0.351863	0.999908	-0.826841	-1.09737	1746	1	TCCTCCAGTCAATACCCATC
ALDOB	0.351863	0.999908	-0.826699	-1.09718	1746	1	TCCATCCAGCCTCGCTATCC
NSG1	0.352467	0.999908	-0.826557	-1.09699	1749	1	TATGACCGCGCCTGCCCCGA
MFHAS1	0.353072	0.999908	-0.826415	-1.0968	1752	1	TACTCGCTCGCTGCCGTTCT
KCNN1	0.393774	0.999908	-0.695944	-1.09663	1808	2	CATGACGAAGCGCGTGTTGA
RPL34	0.353072	0.999908	-0.826272	-1.09661	1752	1	CTTACCCCTCGAAGTCTGCC
DTYMK	0.354079	0.999908	-0.825988	-1.09623	1757	1	ATGCGTATCTGTCCACGACG
DEFB4A	0.35428	0.999908	-0.825846	-1.09605	1758	1	ATATTCCTGATGCCTCTTCC
ANKRD32	0.354884	0.999908	-0.825562	-1.09567	1761	1	AGCGAAGTGATTCTCTTATA
KLK10	0.355287	0.999908	-0.825277	-1.09529	1763	1	TCGTGCTCATCCGTTCGCCT
ZNF132	0.355891	0.999908	-0.824993	-1.09491	1766	1	GAACTCTCTGATGACGAACC
SHMT1	0.355891	0.999908	-0.824851	-1.09473	1766	1	CACCCGAAGCTGATCATCGC
NDOR1	0.356495	0.999908	-0.824709	-1.09454	1769	1	GTCCCACAAGTCTCGCAGCC
SEPSECS	0.356495	0.999908	-0.824566	-1.09435	1769	1	CAGCCAGCTTTATAATGTCC
hsa-mir-8084	0.356495	0.999908	-0.824424	-1.09416	1769	1	AGAAAAAATACTCAGTATCG
TWIST1	0.356495	0.999908	-0.824282	-1.09397	1769	1	CGGGAGTCCGCAGTCTTACG
PXMP2	0.356898	0.999908	-0.82414	-1.09378	1771	1	CGCCAGTTCATCCTCAGCGC
CDC37	0.357503	0.999908	-0.823998	-1.09359	1774	1	ACTGCTCCATGCGTTCCACC
CSRP2	0.398563	0.999908	-0.693994	-1.09356	1830	2	TGTTAAGCGTGCCAGCGCCC
RAG1	0.358308	0.999908	-0.823856	-1.0934	1778	1	ACATCTGCAACACTGCCCGT
ATG4B	0.398563	0.999908	-0.693872	-1.09336	1830	2	CTCTGACCTACGACACTCTC,TCCTGTCGATGAATGCGTTG
VENTX	0.359114	0.999908	-0.823571	-1.09303	1782	1	CTACCGGCCATGGTCCTCTC
hsa-mir-29b-1	0.387017	0.999908	-0.603385	-1.09256	1710	3	CCAAGAACACTGATTTCAAA,TTTGAAATCAGTGTTCTTGG,AGGAAGCTGGTTTCATATGG
DOCK6	0.359315	0.999908	-0.823145	-1.09246	1783	1	GTCGAAGGGTTTCATTGCGC
FABP7	0.359315	0.999908	-0.823003	-1.09227	1783	1	TGCTGTTCGCCACTATGAGA
KLHDC10	0.359517	0.999908	-0.82286	-1.09208	1784	1	GTTTAAGGAATATGCTGTCC
ALG13	0.359919	0.999908	-0.822576	-1.09171	1786	1	GATCTTGTTATTAGTCACGC
ABHD17B	0.360121	0.999908	-0.822434	-1.09152	1787	1	GAGTAAAGTGTATTTCGCAT
hsa-mir-6726	0.360524	0.999908	-0.822292	-1.09133	1789	1	CACATCAGCTAGCGGGAGAC
ANKRA2	0.360524	0.999908	-0.82215	-1.09114	1789	1	AGCTTTGTCTGTTCACCAGT
P2RY1	0.361128	0.999908	-0.822007	-1.09095	1792	1	CAAGGCGCATTTGAACGACG
LATS2	0.361531	0.999908	-0.821723	-1.09057	1794	1	GGATGTCCTGAACCGGAATC
CMTM4	0.361732	0.999908	-0.821581	-1.09039	1795	1	CTTTATTGCTTCAATCGTAC
CDHR1	0.362135	0.999908	-0.821439	-1.0902	1797	1	TCTCACGTATACACCCTGAA
CHUK	0.363142	0.999908	-0.821297	-1.09001	1802	1	ACAGACGTTCCCGAAGCCGC
A2ML1	0.363343	0.999908	-0.821154	-1.08982	1803	1	GCTTACCTGTAGTTCCACCA
MTA1	0.363746	0.999908	-0.821012	-1.08963	1805	1	ATCGGGAGCTGTTCCTCTCC
hsa-mir-181b-2	0.363746	0.999908	-0.82087	-1.08944	1805	1	TCAACATTCATTGCTGTCGG
KDM4D	0.405311	0.999908	-0.69115	-1.08908	1861	2	TGCATGTTGTGCCCGCCAAG
ZFAND1	0.364149	0.999908	-0.820586	-1.08906	1807	1	ACTCATGATCTGACTGATGA
GPR153	0.364955	0.999908	-0.820301	-1.08869	1811	1	CGGTGGTGCGTCCTCCGCGA
SEMA4D	0.365559	0.999908	-0.820017	-1.08831	1814	1	CGTTGGTCCCACACACGTAA
GIPC2	0.365962	0.999908	-0.819733	-1.08793	1816	1	GTATTGTAGAAATAGAGCTG
LONRF2	0.366767	0.999908	-0.819448	-1.08756	1820	1	CCATCTCGTAGTCGCCCGCG
SPINK2	0.367372	0.999908	-0.819306	-1.08737	1823	1	AGACACTTTAACCCTGTGTG
CHODL	0.368177	0.999908	-0.819022	-1.08699	1827	1	GGGGTCCCTACCTTTACCAG
ATP1B2	0.40727	0.999908	-0.689737	-1.08685	1870	2	GTTCGTAATAGCGTCCAGGG
NUTF2	0.369184	0.999908	-0.818738	-1.08661	1832	1	TCAGCACAGCATCACCGCGC
FAM111A	0.369184	0.999908	-0.818595	-1.08642	1832	1	ACCAGACCATGCCCCAAAAT
UROD	0.369789	0.999908	-0.818027	-1.08567	1835	1	CAGGCAGGCCGTTACTTACC
SRPX2	0.369789	0.999908	-0.817885	-1.08548	1835	1	AATGCCTGCCAAGCCGTCGT
NDUFB10	0.370191	0.999908	-0.817742	-1.08529	1837	1	TCACGGGTCGGTCCACGATG
ZNF596	0.370191	0.999908	-0.8176	-1.0851	1837	1	TTAGGATTCCATGACCTTCG
NDUFV1	0.370393	0.999908	-0.817458	-1.08491	1838	1	TCCAGTCGGGCCCCTTCAGC
TOX2	0.370997	0.999908	-0.817174	-1.08454	1841	1	GGGGTACAGGCGGACGTCCA
OR52E6	0.3714	0.999908	-0.817032	-1.08435	1843	1	GAGCATCGTATTGGTGGCCA
SLBP	0.371803	0.999908	-0.816747	-1.08397	1845	1	CCGTCCCAGGCTCCATCGCG
CACNG6	0.372004	0.999908	-0.816605	-1.08378	1846	1	TTCGCACACGGCGCTGCCGT
CHMP5	0.372407	0.999908	-0.816463	-1.08359	1848	1	TTATACCATCCAGTCTTTGA
DUSP19	0.37281	0.999908	-0.816179	-1.08322	1850	1	TGTAATGTACTCCCTTAACC
GNAZ	0.373011	0.999908	-0.816036	-1.08303	1851	1	TGACTATATCCCCACTGTCG
OLFML2B	0.373212	0.999908	-0.815894	-1.08284	1852	1	TGACAAGCGACCTGAACGCT
SRXN1	0.373615	0.999908	-0.815752	-1.08265	1854	1	TCACCCGGATCGTGTCCACG
TPK1	0.373615	0.999908	-0.81561	-1.08246	1854	1	TAAGCGGTTGGCACCTCCAT
PFN3	0.37422	0.999908	-0.815468	-1.08227	1857	1	GTTCGTGCACCGTCTTGTTG
PLS1	0.374824	0.999908	-0.815326	-1.08208	1860	1	GGTATAAGATGCTTACAGTC
MOG	0.375227	0.999908	-0.815183	-1.0819	1862	1	GGTACCGCCCCCCCTTCTCT
TMEM89	0.375831	0.999908	-0.814757	-1.08133	1865	1	CCGCCGTTTCCAGGGTCCGC
TNFAIP6	0.414671	0.999908	-0.686194	-1.08127	1904	2	CACCGCCTTAGCTTCTGCGT,ACCGTGTGGGTTGTAGCAAT
UGT2B11	0.376032	0.999908	-0.814473	-1.08095	1866	1	CACTACCTTATTTGAGACAA
RNASE12	0.376234	0.999908	-0.81433	-1.08076	1867	1	ATGACGTTCCCGTTCCTGCA
CRYAB	0.377039	0.999908	-0.814046	-1.08039	1871	1	ACAGGTGCTCTCCGAAGAAC
PNISR	0.377442	0.999908	-0.81362	-1.07982	1873	1	AGTGAACCAGTTTGACTATC
XPC	0.416195	0.999908	-0.685198	-1.0797	1911	2	CAAGTCGGGCTTTCCGAGCA,TGCCCTTACCTTCCCGTCCA
ZFP36L2	0.416195	0.999908	-0.685056	-1.07947	1911	2	CAACGCATCGCGCGTGCCAA,CGATGTCGACTTCTTGTGCA
WFDC8	0.378449	0.999908	-0.813335	-1.07944	1878	1	AGAACGGCCTGCATGTTAAT
PYGM	0.378852	0.999908	-0.813193	-1.07925	1880	1	ACAACATTGTTGCGATAGCC
SH2D4A	0.378852	0.999908	-0.813051	-1.07906	1880	1	GTACATAGATCCTGATCTAC
VIPR2	0.379255	0.999908	-0.812909	-1.07888	1882	1	CCACAGGCATCGACGAAATC
ZMYND8	0.416848	0.999908	-0.68463	-1.0788	1914	2	ATTCCAGAAGCCCGTTCCAT,GTTCCAATGGAACGGGCTTC
USP17L11	0.379658	0.999908	-0.812767	-1.07869	1884	1	GCTGTGTTTGTTCTTCCCTT
USP17L12	0.379658	0.999908	-0.812767	-1.07869	1884	1	GCTGTGTTTGTTCTTCCCTT
USP17L13	0.379658	0.999908	-0.812767	-1.07869	1884	1	GCTGTGTTTGTTCTTCCCTT
USP17L17	0.379658	0.999908	-0.812767	-1.07869	1884	1	GCTGTGTTTGTTCTTCCCTT
USP17L18	0.379658	0.999908	-0.812767	-1.07869	1884	1	GCTGTGTTTGTTCTTCCCTT
USP17L19	0.379658	0.999908	-0.812767	-1.07869	1884	1	GCTGTGTTTGTTCTTCCCTT
USP17L20	0.379658	0.999908	-0.812767	-1.07869	1884	1	GCTGTGTTTGTTCTTCCCTT
USP17L21	0.379658	0.999908	-0.812767	-1.07869	1884	1	GCTGTGTTTGTTCTTCCCTT
USP17L22	0.379658	0.999908	-0.812767	-1.07869	1884	1	GCTGTGTTTGTTCTTCCCTT
USP17L24	0.379658	0.999908	-0.812767	-1.07869	1884	1	GCTGTGTTTGTTCTTCCCTT
USP17L25	0.379658	0.999908	-0.812767	-1.07869	1884	1	GCTGTGTTTGTTCTTCCCTT
USP17L26	0.379658	0.999908	-0.812767	-1.07869	1884	1	GCTGTGTTTGTTCTTCCCTT
USP17L27	0.379658	0.999908	-0.812767	-1.07869	1884	1	GCTGTGTTTGTTCTTCCCTT
USP17L28	0.379658	0.999908	-0.812767	-1.07869	1884	1	GCTGTGTTTGTTCTTCCCTT
USP17L29	0.379658	0.999908	-0.812767	-1.07869	1884	1	GCTGTGTTTGTTCTTCCCTT
USP17L3	0.379658	0.999908	-0.812767	-1.07869	1884	1	GCTGTGTTTGTTCTTCCCTT
USP17L30	0.379658	0.999908	-0.812767	-1.07869	1884	1	GCTGTGTTTGTTCTTCCCTT
USP17L4	0.379658	0.999908	-0.812767	-1.07869	1884	1	GCTGTGTTTGTTCTTCCCTT
USP17L5	0.379658	0.999908	-0.812767	-1.07869	1884	1	GCTGTGTTTGTTCTTCCCTT
SSX2	0.379658	0.999908	-0.812624	-1.0785	1884	1	ACGGAGACGACGCCTTTGCA
SSX2B	0.379658	0.999908	-0.812624	-1.0785	1884	1	ACGGAGACGACGCCTTTGCA
hsa-mir-2861	0.382075	0.999908	-0.812198	-1.07793	1896	1	TCCGGCTCCCCCTGGCCTCT
MAGI2	0.382075	0.999908	-0.812056	-1.07774	1896	1	GTAACAGACCAGATACTTCC
PRR23B	0.382477	0.999908	-0.811771	-1.07737	1898	1	CCGTCGAGGCGATGGTCAGC
CA3	0.383283	0.999908	-0.811629	-1.07718	1902	1	ATTCACCACGCCGCCCTGCG
TIPRL	0.383283	0.999908	-0.811487	-1.07699	1902	1	TACTCACAATCTTCACACTC
NIPSNAP1	0.383283	0.999908	-0.811345	-1.0768	1902	1	AGCCACCTGAGAATCGCCAC
KIR3DL3	0.383283	0.999908	-0.811203	-1.07661	1902	1	GACCCATGGAATAGTTGACC
KCTD1	0.383686	0.999908	-0.811061	-1.07642	1904	1	CCCGTGTACCCTCCGTCATC
PLEK2	0.384491	0.999908	-0.810918	-1.07623	1908	1	AGGCGCGATGGTTCATCCTT
MYEF2	0.384693	0.999908	-0.810776	-1.07605	1909	1	AAGGAAGTGTTCAGCATAGC
APBB2	0.385096	0.999908	-0.810634	-1.07586	1911	1	CCCAAATCCCGACTGTGTCT
SLC25A12	0.385297	0.999908	-0.810492	-1.07567	1912	1	GACTTTGTTCAGCGCTATCT
TSPAN9	0.419896	0.999908	-0.682467	-1.07539	1928	2	GCAACGCCACCACGCCTTTG
hsa-mir-6843	0.386707	0.999908	-0.810208	-1.07529	1919	1	CCCTCAGCTGTCCCCACAGC
2019-09-15	0.38711	0.999908	-0.810065	-1.0751	1921	1	AAATCTGTTGTTCGTAAAAC
INSL3	0.387714	0.999908	-0.809923	-1.07491	1924	1	CGGGGCCCAACGCGAACACC
GGTLC1	0.388117	0.999908	-0.809781	-1.07473	1926	1	CTATGACGTGAAGTGGGCCG
hsa-mir-5680	0.38852	0.999908	-0.809639	-1.07454	1928	1	TTTGCTTGCATTGGGTTAGC
MTL5	0.388922	0.999908	-0.809497	-1.07435	1930	1	GTTGTTGCAAAAGTCCCCAC
C6orf48	0.389124	0.999908	-0.808928	-1.07359	1931	1	CTGACACAATATCTTCCGCC
SRL	0.389527	0.999908	-0.808644	-1.07322	1933	1	ATGTGGGAGCGGTCCCTCAA
PARP1	0.38993	0.999908	-0.808502	-1.07303	1935	1	TTCTAGTCGCCCATGTTTGA
KCNMB2	0.38993	0.999908	-0.808359	-1.07284	1935	1	TCCTGCGCTCATACATGCAG
H2BFWT	0.390534	0.999908	-0.808217	-1.07265	1938	1	TCACTTTCTCTGTTGCTGTA
C1orf56	0.391138	0.999908	-0.807933	-1.07227	1941	1	GGACGACCGGCTAAAGCCGG
FN1	0.391541	0.999908	-0.807649	-1.07189	1943	1	GACCTACCTAGGCAATGCGT
FGF23	0.391742	0.999908	-0.807506	-1.07171	1944	1	CGATGTTGGGGGCCCGCCTC
SYTL3	0.391944	0.999908	-0.807364	-1.07152	1945	1	CGAGCCAAGAAATTTCCAAC
COPB1	0.392548	0.999908	-0.807222	-1.07133	1948	1	CCTTGTTAAGTTTAGATGCT
CENPA	0.392548	0.999908	-0.80708	-1.07114	1948	1	CCTCGGGCTTTCGGCTCCGG
ALDH1A2	0.392951	0.999908	-0.806938	-1.07095	1950	1	ACCACTCAGTGCACTCTACA
MRGPRX2	0.393353	0.999908	-0.806796	-1.07076	1952	1	AGACTGCTTCTCGACATCTC
TECTA	0.393353	0.999908	-0.806653	-1.07057	1952	1	TGCATCGAGCCACCCCCCTA
NPY1R	0.393353	0.999908	-0.806511	-1.07039	1952	1	ACGGCTCATCAGTCATTACT
CTSB	0.394159	0.999908	-0.806369	-1.0702	1956	1	CTCCACGCTGACGTGCGCAT
TNXB	0.394361	0.999908	-0.806227	-1.07001	1957	1	TCCAGTATGAGGACACGAAC
ZNF414	0.394562	0.999908	-0.806085	-1.06982	1958	1	GGCCTGACCAGCATAGTCTC
BRIP1	0.394562	0.999908	-0.805943	-1.06963	1958	1	TCACTTACGCCCTCATCTGC
RABIF	0.39577	0.999908	-0.805516	-1.06906	1964	1	CTCATGGGAAACTCGTTCCA
LSM11	0.396173	0.999908	-0.805374	-1.06888	1966	1	CGGAGTACGAGAGCTTCCTC
COX6A1	0.396173	0.999908	-0.805232	-1.06869	1966	1	ACCCAGCAGCCGAGAAACCG
OXA1L	0.396173	0.999908	-0.80509	-1.0685	1966	1	GCTCAGGTCCACAGCGTCGC
RSBN1	0.397784	0.999908	-0.804805	-1.06812	1974	1	ACGAGACTTATCTGCCGCAT
SCN4A	0.397784	0.999908	-0.804663	-1.06793	1974	1	CCCGCGCCTGACTACGCTGA
GRIA4	0.432956	0.999908	-0.677662	-1.06782	1988	2	CAACTAAGACCTTCGTTACG,AAGAGTGCTCCTCGTAACGA
ARGLU1	0.397784	0.999908	-0.804521	-1.06774	1974	1	CCGTTCGCGCTCCACCAACA
NPLOC4	0.397986	0.999908	-0.804379	-1.06756	1975	1	GATAATTCGTGTCCAGTCCC
SMPX	0.398187	0.999908	-0.804237	-1.06737	1976	1	AGGACCTGCAGTCAATCTAT
TES	0.433391	0.999908	-0.677274	-1.06721	1990	2	TAGCATCTGCATGTACTGCC
CHAC2	0.398792	0.999908	-0.804094	-1.06718	1979	1	TCCGACCAGCTTGTCCTGAT
OR5B21	0.399194	0.999908	-0.803952	-1.06699	1981	1	GGCCTATGATCGCCATGCAG
TBC1D19	0.399597	0.999908	-0.80381	-1.0668	1983	1	AAAAGTACCTTTCGTGCCAG
PRDX5	0.400604	0.999908	-0.803668	-1.06661	1988	1	TTCTCTGCAGGTTCGGCTCC
FDX1	0.400806	0.999908	-0.803526	-1.06642	1989	1	GTCCACTTTATAAACCGTGA
GPT2	0.434262	0.999908	-0.676667	-1.06625	1994	2	GCGTGAGGATGCGCTCGCGC,GCGGCTCACCTGCCGGAGGA
hsa-mir-1273g	0.401208	0.999908	-0.803384	-1.06623	1991	1	GAGGATTGCTTGAGTCAGGG
SIM1	0.402417	0.999908	-0.802957	-1.06567	1997	1	CCTGGATGGCTTCATCTTCG
JAK3	0.402618	0.999908	-0.802815	-1.06548	1998	1	CCTACCGAATCCTGTACAGC
TCEANC2	0.403223	0.999908	-0.802673	-1.06529	2001	1	ATCCCAAAACCGAGTCGTTG
PPP6R1	0.434915	0.999908	-0.675973	-1.06516	1997	2	TGAGCAGATCCACCCGTCGA
KLHDC7A	0.403424	0.999908	-0.802531	-1.0651	2002	1	ATCCATAGCCCGCGTCCGAA
MBD2	0.403625	0.999908	-0.802388	-1.06491	2003	1	AGTCTTGAAAGCGCATGCCA
TMEM52B	0.40423	0.999908	-0.802246	-1.06473	2006	1	AGGTGCTTTCTGCCCGCACA
SMAD4	0.404632	0.999908	-0.802104	-1.06454	2008	1	AATACACTTACCAGGATGAT
OPHN1	0.404632	0.999908	-0.801962	-1.06435	2008	1	AACCATGGGTCATCCCCCGC
SAC3D1	0.404834	0.999908	-0.801678	-1.06397	2009	1	TACTCCTTCACCGCGCGCTG
TTC18	0.404834	0.999908	-0.801535	-1.06378	2009	1	GGTGGACCTTCTTCCCTTAC
FHOD3	0.405035	0.999908	-0.801393	-1.06359	2010	1	CCTTCTCAAATCTCGTCCGC
PIK3AP1	0.406244	0.999908	-0.801109	-1.06322	2016	1	TTTCCATCCTCCGCACCGCG
UNC45B	0.406244	0.999908	-0.800967	-1.06303	2016	1	TCCTCAGGAGAGCTACGTCC
PDZK1IP1	0.406445	0.999908	-0.800825	-1.06284	2017	1	TATCGCGGTGGCCGTGTTCC
hsa-mir-135a-1	0.406445	0.999908	-0.800682	-1.06265	2017	1	AGTGAGCAGTAGAATCACAT
TMEM79	0.406848	0.999908	-0.80054	-1.06246	2019	1	CGCAGCGCAGTGTGTAGATC
CYP4A11	0.407654	0.999908	-0.800398	-1.06227	2023	1	TTGCCTCCCCATAGCCAATG
ST8SIA6	0.407654	0.999908	-0.800256	-1.06208	2023	1	GGTGGGTTACCTGGCGCGGC
GOLGA6L4	0.407855	0.999908	-0.800114	-1.06189	2024	1	GAACAAGAGCACACTGCAGT
RNF214	0.408258	0.999908	-0.799972	-1.06171	2026	1	CCTGGTAACGCTCTTTCAAC
VGLL2	0.408459	0.999908	-0.799829	-1.06152	2027	1	CCGCACTTCGACCCGCGCTA
hsa-mir-5707	0.408661	0.999908	-0.799687	-1.06133	2028	1	ACACGTTTGAATGCTGTACA
ARCN1	0.409063	0.999908	-0.799545	-1.06114	2030	1	ATAAGCCCTCAATCCGAGTT
TFDP2	0.409063	0.999908	-0.799403	-1.06095	2030	1	CCACAGAGACTAACCAGTTC
RBMS3	0.409466	0.999908	-0.799261	-1.06076	2032	1	TCTCAAGGCAAATGGCGTGC
PKIB	0.41007	0.999908	-0.799119	-1.06057	2035	1	CTCAGATTTGCCCCTCAAAC
NTRK2	0.41007	0.999908	-0.798976	-1.06039	2035	1	CGGATCACCTGCCACACTAC
SYVN1	0.41007	0.999908	-0.798834	-1.0602	2035	1	CAAGTATGTGCTGCACTCCG
C1orf168	0.410272	0.999908	-0.798692	-1.06001	2036	1	ACCTCCCATCGTGAACCTCC
SPAG7	0.410675	0.999908	-0.798408	-1.05963	2038	1	AGCCAATGAACAAGATCGAG
KLF17	0.443404	0.999908	-0.672402	-1.05953	2036	2	GCTCTCCTACGGGCATTAGT,CTTCATGTACGGCCGACCGC
CPT1C	0.411682	0.999908	-0.798123	-1.05925	2043	1	CACATAATTGGACGCCCACC
RFPL4A	0.412085	0.999908	-0.797981	-1.05906	2045	1	CCTTGAAACTTCCTCATCCT
RFPL4AL1	0.412085	0.999908	-0.797981	-1.05906	2045	1	CCTTGAAACTTCCTCATCCT
IFNAR2	0.412085	0.999908	-0.797839	-1.05888	2045	1	CATATGAAATACCAAACACG
hsa-mir-103b-1	0.444057	0.999908	-0.671975	-1.05886	2039	2	GGATCAAGCAGCATTGTACA,TGCTTGATCCATATGCAACA
DIS3L	0.412085	0.999908	-0.797697	-1.05869	2045	1	AGTATTCGTGATTACTTTCA
TGM2	0.412286	0.999908	-0.797555	-1.0585	2046	1	ACTGGCCATACTTGACGCGC
hsa-mir-4436b-1	0.412286	0.999908	-0.797413	-1.05831	2046	1	ATCTGCTCCACCATTTGGGC
hsa-mir-892b	0.413092	0.999908	-0.79727	-1.05812	2050	1	TAAATGGCACCTTTCTGAGT
TCEA2	0.413293	0.999908	-0.796986	-1.05774	2051	1	TGAAGTATAAGAACCGTGTA
hsa-mir-3909	0.445364	0.999908	-0.671239	-1.0577	2045	2	CTGTCCTTCCTCTGGGGAGC
BDP1	0.413696	0.999908	-0.796702	-1.05737	2053	1	GATGTGCCCACAGTCGATTT
H3F3B	0.445799	0.999908	-0.67098	-1.05729	2047	2	CCGACCTACCTGTAGCGATG,TCTTACCTGCAGCGCACCGA
SMG1	0.4143	0.999908	-0.796417	-1.05699	2056	1	CTCGACTGTCGAATCTTCTT
SMIM6	0.414904	0.999908	-0.796275	-1.0568	2059	1	AGTGAGTAAACCAAACACGA
TUBA1A	0.415307	0.999908	-0.796133	-1.05661	2061	1	AACATACCAGCTTGCGAATT
DUS4L	0.415911	0.999908	-0.795849	-1.05623	2064	1	ATGTCTATTCCATTCGCATA
TOMM40L	0.416113	0.999908	-0.795707	-1.05605	2065	1	AGTGAAGCTCGTTGTCAACA
SRSF11	0.416113	0.999908	-0.795564	-1.05586	2065	1	CAAGATCAAGATCACGTTCT
PROM1	0.416516	0.999908	-0.795422	-1.05567	2067	1	ATCTGTGAACGCCTTGTCCT
HIVEP3	0.416516	0.999908	-0.79528	-1.05548	2067	1	GCGAGGATCAAAATCTTCGA
UBE2U	0.416717	0.999908	-0.795138	-1.05529	2068	1	ACAATTCCGTTTCATCCAAA
NEDD1	0.417523	0.999908	-0.794996	-1.0551	2072	1	ACTTCGTTTGTTCACTGTTG
MPP1	0.418127	0.999908	-0.794854	-1.05491	2075	1	GTTCATTGCACCTACTGACC
TMEM86B	0.418127	0.999908	-0.794711	-1.05473	2075	1	GAGGCAGAAGTACACGCAGC
SCGB1A1	0.418127	0.999908	-0.794569	-1.05454	2075	1	TCGATGACACGCTGAAAGCT
NOMO1	0.41853	0.999908	-0.794427	-1.05435	2077	1	CCTCTTACCTTATCATACAA
NOMO2	0.41853	0.999908	-0.794427	-1.05435	2077	1	CCTCTTACCTTATCATACAA
NOMO3	0.41853	0.999908	-0.794427	-1.05435	2077	1	CCTCTTACCTTATCATACAA
ISM2	0.41853	0.999908	-0.794285	-1.05416	2077	1	CGTGCGCTCCGCGACCGAGC
RNF20	0.418731	0.999908	-0.794143	-1.05397	2078	1	GCTGAACTCTTTCCTCGCAC
FBXW7	0.418731	0.999908	-0.794001	-1.05378	2078	1	CTCAGTATCAAACCGCTTCT
CCL5	0.418933	0.999908	-0.793858	-1.05359	2079	1	CACACACTTGGCGGTTCTTT
hsa-mir-4720	0.419537	0.999908	-0.793716	-1.0534	2082	1	CAGTTAAACTTGGCTATACT
BRWD3	0.419738	0.999908	-0.793574	-1.05322	2083	1	AGCTGTATTACCTGATCGCT
VAX1	0.420141	0.999908	-0.793432	-1.05303	2085	1	AAGGACGTGCGCGTCCTCTT
KRTAP21-3	0.420544	0.999908	-0.79329	-1.05284	2087	1	TGTATACACAGCACCCACTG
SGPP2	0.421148	0.999908	-0.793148	-1.05265	2090	1	TGGTGGTGTCCGCCCGGGTT
SLC10A3	0.421752	0.999908	-0.793005	-1.05246	2093	1	GGTCACACCGTGCCACCGAC
FBXO6	0.421954	0.999908	-0.792863	-1.05227	2094	1	CTCGGCTGACTACTTCGTGT
SPIB	0.421954	0.999908	-0.792721	-1.05208	2094	1	CGGCACCACCATGCTCGCCC
LCA5	0.421954	0.999908	-0.792579	-1.05189	2094	1	TTTCAGCAAGCAACTGTCGT
LRCH2	0.422356	0.999908	-0.792437	-1.05171	2096	1	TGATCTAGGCTTCAAGCCAA
MAP3K19	0.422961	0.999908	-0.792295	-1.05152	2099	1	TGACTGCAGTCATTCCACAC
LIPJ	0.423162	0.999908	-0.792152	-1.05133	2100	1	TATGATATTGTAACCGAAGA
C1QTNF1	0.423565	0.999908	-0.79201	-1.05114	2102	1	GGTGGTGATCTTGTTCGCGC
SPSB3	0.423968	0.999908	-0.791868	-1.05095	2104	1	GCCGGTCACGGGCACCGCAC
GRB7	0.424975	0.999908	-0.791442	-1.05039	2109	1	CTGCGTCACCACGTACACGT
SEMA3B	0.425378	0.999908	-0.791299	-1.0502	2111	1	CGCCTGTCCGTGTCCCGCGT
EXO5	0.455594	0.999908	-0.666288	-1.0499	2092	2	CTCTCGGTGGCCCATCCAGT,GGGGAGGGTGTACTTCTTGT
HSPE1-MOB4	0.42578	0.999908	-0.791015	-1.04982	2113	1	CAGTACACTAGCTGTTCAAC
MOB4	0.42578	0.999908	-0.791015	-1.04982	2113	1	CAGTACACTAGCTGTTCAAC
SPESP1	0.425982	0.999908	-0.790731	-1.04944	2114	1	CAGAGGGAACACTTCGTACT
BCL2L11	0.426183	0.999908	-0.790589	-1.04925	2115	1	CAACCACTATCTCAGTGCAA
MKRN2	0.426586	0.999908	-0.790446	-1.04906	2117	1	ATGCGGCTTCATCTCGGGGC
hsa-mir-498	0.427392	0.999908	-0.790304	-1.04888	2121	1	AGTTTGAGAGCAATCGTCTA
SDHD	0.427392	0.999908	-0.79002	-1.0485	2121	1	TCTGTTGCTTCGAACTCCAG
CPN2	0.427593	0.999908	-0.789878	-1.04831	2122	1	CACGTGGCCGGACGAAAGCA
NCMAP	0.458424	0.999908	-0.665203	-1.04819	2105	2	CTTCAGTCCTGTTGACGTCC
CNBD1	0.428197	0.999908	-0.789736	-1.04812	2125	1	ATGTGAGACAAAATAGCTGC
KCNG4	0.459512	0.999908	-0.665055	-1.04796	2110	2	GCTCTGCGATGATTACGACG
HOXB6	0.4286	0.999908	-0.789593	-1.04793	2127	1	TGCGCGCAGTCCGACTTCCG
PER3	0.429204	0.999908	-0.789451	-1.04774	2130	1	TGGTGCTGCTGTAACCGCAT
2019-03-03	0.429204	0.999908	-0.789309	-1.04756	2130	1	TTGCAGTCGAGCGCAAACCC
SLC22A2	0.429607	0.999908	-0.789167	-1.04737	2132	1	GGTGCATACCTGAGTCTCCC
NUP88	0.429809	0.999908	-0.789025	-1.04718	2133	1	AGGGCGTATACCGCATCTCT
ZP1	0.43001	0.999908	-0.788883	-1.04699	2134	1	GAGACCTTCAGCTCGTACTA
RDH14	0.430211	0.999908	-0.788598	-1.04661	2135	1	GGGTGGGCGAGCTCATAGTC
WBP5	0.430211	0.999908	-0.788314	-1.04623	2135	1	GTATATCTTCTTTAAACTCC
MAD1L1	0.430413	0.999908	-0.788172	-1.04605	2136	1	CCTCCCCTTCAGTGCGTTGA
ROCK2	0.431017	0.999908	-0.78803	-1.04586	2139	1	TATGCTTACCTGAACCACCC
APCDD1L	0.462342	0.999908	-0.663444	-1.04542	2123	2	ACCTTCACCGTGTATGCCGC,CGTGCCCCTGGTGTAGCGGC
MFAP1	0.432226	0.999908	-0.787603	-1.04529	2145	1	CATGATGCGTCAGCGAGCAC
NUP155	0.43283	0.999908	-0.787319	-1.04491	2148	1	TGGGAGAGGAACTCTTCGGA
NYAP1	0.462778	0.999908	-0.663017	-1.04475	2125	2	CTTGACCGCCGAGTACACCA,TCCCTGCGCTGGCGATGACG
TSPYL4	0.433233	0.999908	-0.787177	-1.04472	2150	1	TGAAACTTCTGCGCTGCATG
hsa-mir-3661	0.433434	0.999908	-0.787034	-1.04454	2151	1	TACAGCTCACCTTCTCGCAG
PPP2CA	0.433434	0.999908	-0.787034	-1.04454	2151	1	TACAGCTCACCTTCTCGCAG
SH2D4B	0.433635	0.999908	-0.786892	-1.04435	2152	1	GCCCTACGAAGAGATCTCTG
hsa-mir-526a-2	0.433635	0.999908	-0.78675	-1.04416	2152	1	CTCGTGCTGTGACCCTCTAG
KCNJ10	0.434642	0.999908	-0.786466	-1.04378	2157	1	ACTCTCCGCCGTCGTATCCC
hsa-mir-133a-2	0.434844	0.999908	-0.786324	-1.04359	2158	1	AATCGACTGTCCAATGGATT
hsa-mir-548ad	0.43565	0.999908	-0.786181	-1.0434	2162	1	GGTTGGTGCAAAAGTAATTG
hsa-mir-548ap	0.43565	0.999908	-0.786181	-1.0434	2162	1	GGTTGGTGCAAAAGTAATTG
hsa-mir-548c	0.43565	0.999908	-0.786181	-1.0434	2162	1	GGTTGGTGCAAAAGTAATTG
hsa-mir-548h-2	0.43565	0.999908	-0.786181	-1.0434	2162	1	GGTTGGTGCAAAAGTAATTG
hsa-mir-548h-4	0.43565	0.999908	-0.786181	-1.0434	2162	1	GGTTGGTGCAAAAGTAATTG
hsa-mir-548i-4	0.43565	0.999908	-0.786181	-1.0434	2162	1	GGTTGGTGCAAAAGTAATTG
hsa-mir-548n	0.43565	0.999908	-0.786181	-1.0434	2162	1	GGTTGGTGCAAAAGTAATTG
hsa-mir-548t	0.43565	0.999908	-0.786181	-1.0434	2162	1	GGTTGGTGCAAAAGTAATTG
hsa-mir-548z	0.43565	0.999908	-0.786181	-1.0434	2162	1	GGTTGGTGCAAAAGTAATTG
hsa-mir-6741	0.436052	0.999908	-0.786039	-1.04322	2164	1	TGCCATCAGCTTCTAGGGTG
FBXW8	0.436455	0.999908	-0.785897	-1.04303	2166	1	TGAGCACGATGCAAGAATAC
SLC35A1	0.436858	0.999908	-0.785755	-1.04284	2168	1	TGAACAGCATACACTAACGA
PARPBP	0.437261	0.999908	-0.785613	-1.04265	2170	1	TCTGAGAGAACTACTCTATG
TTC9C	0.437462	0.999908	-0.785471	-1.04246	2171	1	TCCGGCCCGATACAAGGCCT
TMEM129	0.437865	0.999908	-0.785186	-1.04208	2173	1	GCCGAGACTCCGTCACAGTC
CAPN6	0.438268	0.999908	-0.784902	-1.04171	2175	1	GACTTGTTGCCCACCATTAA
CYB5B	0.438671	0.999908	-0.784618	-1.04133	2177	1	AGGCAGTATGTCCGGTTCAA
RB1CC1	0.438872	0.999908	-0.784475	-1.04114	2178	1	ACTACGATTGACACTAAAGA
TMEM185B	0.468872	0.999908	-0.660617	-1.04096	2153	2	CAACCCTCGCTACCGCACCG
hsa-mir-4537	0.439678	0.999908	-0.784191	-1.04076	2182	1	AACCAGGGCTGGGCTGAGCT
NonTargetingControlGuideForHuman_0939	0.439678	0.999908	-0.784049	-1.04057	2182	1	CAAATACAATTACTTATAGC
TMEM17	0.440886	0.999908	-0.783765	-1.0402	2188	1	CCGTGTTCAGTGATTCCAAT
C18orf42	0.440886	0.999908	-0.783622	-1.04001	2188	1	TTAACTCCCCAACGCCCAGT
MBP	0.441692	0.999908	-0.78348	-1.03982	2192	1	GCGCTTCTTTGGCGGTGACA
EEF2	0.442095	0.999908	-0.783338	-1.03963	2194	1	CTCCCCCTTGGCGGCGAACT
MMRN1	0.442296	0.999908	-0.783054	-1.03925	2195	1	GGTGTGCTTATGTACATACC
CEP57L1	0.442497	0.999908	-0.782912	-1.03906	2196	1	CTTTCTAGGCCCAGCTTCAG
HYLS1	0.442699	0.999908	-0.782769	-1.03888	2197	1	CTACCCGGTCTGTCTTGCCC
MMP11	0.473008	0.999908	-0.659178	-1.0387	2172	2	GCTTTGTGTGGCGCCTCCGT,ACATCATGATCGACTTCGCC
ZNF653	0.443505	0.999908	-0.782485	-1.0385	2201	1	CCCTGGTTACGACGCTCTCA
ALKBH1	0.444109	0.999908	-0.782343	-1.03831	2204	1	AGAAGTCGATGACCCCTTCC
hsa-mir-495	0.444512	0.999908	-0.782201	-1.03812	2206	1	AACATGGTGCACTTCTTTTT
ZNF251	0.444512	0.999908	-0.782059	-1.03793	2206	1	ATCAACTCCGGCTTAGGGAC
OR8A1	0.444713	0.999908	-0.781916	-1.03774	2207	1	TGGTGACCAAGTAGATCCCG
ADRA1D	0.445317	0.999908	-0.781632	-1.03737	2210	1	TGCGCGCGACCACGTACACG
SIRPD	0.445921	0.999908	-0.78149	-1.03718	2213	1	TACTGCGTGAAGTTCATAAA
NonTargetingControlGuideForHuman_0800	0.446324	0.999908	-0.781348	-1.03699	2215	1	GTATTACTGATATTGGTGGG
MTX1	0.476056	0.999908	-0.658041	-1.0369	2186	2	CATCACCCACCTTCGAAAAG,TGAGATGACCTCTCCATGAC
hsa-mir-6867	0.446727	0.999908	-0.781063	-1.03661	2217	1	TCTGCCCGGTGTGTGTGTAG
MARS	0.44713	0.999908	-0.780921	-1.03642	2219	1	TGACCGGCAGATTGCACTAG
ST6GALNAC1	0.447331	0.999908	-0.780779	-1.03623	2220	1	GAACACTTTGCACCACCCTT
STS	0.447936	0.999908	-0.780637	-1.03605	2223	1	CGAGGTCGTCAGCCATCACC
FNDC1	0.435874	0.999908	-0.572127	-1.03596	1926	3	AGCACAAAGTACACTACCCC,GTGGGTCCCACGTGACTTTC
DBNDD1	0.448338	0.999908	-0.780495	-1.03586	2225	1	GCTGAACTCACCTCCGGTGC
hsa-mir-4437	0.448741	0.999908	-0.780353	-1.03567	2227	1	CAAGGGTCATCCCCTCCTTG
DLL4	0.449144	0.999908	-0.78021	-1.03548	2229	1	GTCCGGGCGAGACGACCGCC
hsa-mir-1270-1	0.477797	0.999908	-0.657045	-1.03534	2194	2	CTGTGTTGGGTATAAGTAAC,ACAGAGTTATACTGGAGATA
hsa-mir-1270-2	0.477797	0.999908	-0.657045	-1.03534	2194	2	CTGTGTTGGGTATAAGTAAC,ACAGAGTTATACTGGAGATA
RERGL	0.449345	0.999908	-0.780068	-1.03529	2230	1	TTTCTTACTAAGCGATTCAT
BANF1	0.449345	0.999908	-0.779926	-1.0351	2230	1	TTGCAGGCCTATGTTGTCCT
MOGAT3	0.449748	0.999908	-0.779784	-1.03491	2232	1	TCCTCCTCTTCACGTCACTC
KLK2	0.47845	0.999908	-0.656683	-1.03476	2197	2	ACAGGTGGTAAAGACACTTG
PNPLA6	0.47845	0.999908	-0.656619	-1.03466	2197	2	GCCAGGGTGACTACGTCTTC,GGAGTTAGCCAGGTCGCCCT
ATP6V0D2	0.450352	0.999908	-0.7795	-1.03454	2235	1	TAATGGCGTTTCGATCAGAA
SF3A1	0.450957	0.999908	-0.779357	-1.03435	2238	1	GTAGGCATGGTAAGGGTCAT
VOPP1	0.450957	0.999908	-0.779215	-1.03416	2238	1	GGCTGACCTGGGCCGGGATT
GBP5	0.451158	0.999908	-0.779073	-1.03397	2239	1	GCTCATTAAAGTTCTCGATG
hsa-mir-552	0.451561	0.999908	-0.778931	-1.03378	2241	1	GAAAGGCATCTTCAACCAAC
C5orf45	0.451964	0.999908	-0.778647	-1.0334	2243	1	CCTGTAGTAGATTTAACTTT
CEP72	0.452568	0.999908	-0.778504	-1.03322	2246	1	CCACGCCTTAACCGAGCTCG
TAAR1	0.452769	0.999908	-0.778362	-1.03303	2247	1	ATAATTCTGACCACACTCGT
hsa-mir-4301	0.452769	0.999908	-0.77822	-1.03284	2247	1	ACAAGTGAAGTAGTGGGAGG
hsa-mir-4643	0.452769	0.999908	-0.778078	-1.03265	2247	1	TAAGTGTGCTTTAGCATTTA
hsa-mir-573	0.48128	0.999908	-0.655321	-1.03262	2210	2	GATCAGTTACACATCACTTC
hsa-mir-4760	0.452971	0.999908	-0.777936	-1.03246	2248	1	GGCTGAGACCAGGGCTGCCA
KIAA1191	0.453172	0.999908	-0.777794	-1.03227	2249	1	CGCACTCTTCACCTAAGCAG
DPH3	0.453575	0.999908	-0.777651	-1.03208	2251	1	CTCGTCATGAAACACTGCCA
C15orf60	0.453978	0.999908	-0.777367	-1.03171	2253	1	ATAACCGTGCAGGTGCCTGA
hsa-mir-30c-2	0.454381	0.999908	-0.777225	-1.03152	2255	1	ACATCCTACACTCTCAGCTG
TENM3	0.454783	0.999908	-0.777083	-1.03133	2257	1	GCAGACGAGTTCACTAGACA
FGFR1	0.454985	0.999908	-0.776941	-1.03114	2258	1	CACCCGAGGCATTATTTGAC
SHROOM2	0.454985	0.999908	-0.776798	-1.03095	2258	1	GTGCCTACCTCGCGTGGTGT
SOX15	0.455791	0.999908	-0.776514	-1.03057	2262	1	CCATACAACCCTCCCCTTGC
SLC25A34	0.455992	0.999908	-0.77623	-1.0302	2263	1	CCGCGTGCTGACCACATCGA
CPLX4	0.456798	0.999908	-0.776088	-1.03001	2267	1	CAGAAGTGTTCCGTGATGTG
SSBP3	0.48498	0.999908	-0.653633	-1.02996	2227	2	TTTACTGTGCAGCTCCTGAA,CCCACTCACCTCCGATAAGA
RCOR3	0.456798	0.999908	-0.775945	-1.02982	2267	1	TCGGAGCCGAATACCAAGCT
NonTargetingControlGuideForHuman_0447	0.456798	0.999908	-0.775803	-1.02963	2267	1	ACAAAGATCGCATGGCATAC
CD300LF	0.458006	0.999908	-0.775519	-1.02925	2273	1	TGGCTTACCTGTTGTCCAAG
HBP1	0.458409	0.999908	-0.775092	-1.02869	2275	1	CTAGTGGCTATGATGTGTAC
CST2	0.459013	0.999908	-0.77495	-1.0285	2278	1	CGATTATCCTGTCCTCCTCC
TEX22	0.459617	0.999908	-0.774808	-1.02831	2281	1	ATGCGACTTTCGAGGCCTCG
TSSC4	0.459617	0.999908	-0.774666	-1.02812	2281	1	TTCGACCCCTCGGACTGGTT
LAIR1	0.460423	0.999908	-0.774524	-1.02793	2285	1	TCATTGTGACTGTTGTCCGA
OR56A3	0.460624	0.999908	-0.774382	-1.02774	2286	1	TCAGCACAACTCCGTTATTG
hsa-mir-4789	0.461027	0.999908	-0.774239	-1.02756	2288	1	TATTTACACATACACATATC
PEX6	0.461229	0.999908	-0.773955	-1.02718	2289	1	ATGGGTGGTGTCGGCCAAGT
B4GALT7	0.462437	0.999908	-0.773529	-1.02661	2295	1	TCCGCACGATGTTCCCCTCG
C1orf131	0.462638	0.999908	-0.773386	-1.02642	2296	1	GAGCGCTTCGAGCTTCTTCA
MTERFD1	0.463444	0.999908	-0.773102	-1.02605	2300	1	CGTCTCCCAAGGCTGCTAAC
RLBP1	0.464048	0.999908	-0.77296	-1.02586	2303	1	CCACGTTGAACTTCCGTGCG
hsa-mir-4704	0.46425	0.999908	-0.772818	-1.02567	2304	1	CACTCACATGCCTAGTGTCT
ESAM	0.46425	0.999908	-0.772676	-1.02548	2304	1	AGCCCGCTGTCCAATACCAG
FKBP6	0.465055	0.999908	-0.772533	-1.02529	2308	1	TTCTTACAGATATTACACTG
GSC	0.465055	0.999908	-0.772391	-1.0251	2308	1	CTGCACGGGGACTCGCTCTA
C10orf12	0.46566	0.999908	-0.772107	-1.02472	2311	1	GTATCCTCGAGTACTCTTTC
PRSS27	0.46566	0.999908	-0.771965	-1.02454	2311	1	GCCCGTCTCAAAGATCACCG
TSTA3	0.46566	0.999908	-0.771823	-1.02435	2311	1	GACCCGCGCCCTGTTTGAGA
TPST2	0.465861	0.999908	-0.77168	-1.02416	2312	1	CTCCTCGCCGCAGCGCACCT
LCE2D	0.465861	0.999908	-0.771538	-1.02397	2312	1	TCTCACAGCAATCGGGGCTC
KRIT1	0.466465	0.999908	-0.771254	-1.02359	2315	1	TTTCTCTAACAATATGCGAG
RBM23	0.466465	0.999908	-0.771112	-1.0234	2315	1	TTCTAAGGGCATTGCCTACG
FAM177B	0.466667	0.999908	-0.77097	-1.02322	2316	1	TTCGTCCTGCCCAAAATCGT
ZNF610	0.467069	0.999908	-0.770827	-1.02303	2318	1	TTCACTGCGTACCTTACAGA
ZNF26	0.467069	0.999908	-0.770543	-1.02265	2318	1	TTACCCAGCACGAAGCTGTC
BAGE	0.495646	0.999908	-0.648941	-1.02256	2276	2	TTTCCCTCCGCAACAATCTC,ATCATTGCCAGAGATTGTTG
hsa-mir-16-1	0.467472	0.999908	-0.770401	-1.02246	2320	1	TTAACTGTGCTGCTGAAGTA
KIAA1024L	0.468077	0.999908	-0.770117	-1.02208	2323	1	TGTCTCCCAACCAAAACCGC
PDF	0.468077	0.999908	-0.769974	-1.02189	2323	1	TGGGGTTCACGAACACGCGC
ADAD2	0.468479	0.999908	-0.76969	-1.02152	2325	1	TGCTCACCTACCTACGCTCA
DPPA4	0.468479	0.999908	-0.769548	-1.02133	2325	1	TGCCTCTGGTGTCCTCGCCC
C19orf82	0.468681	0.999908	-0.769406	-1.02114	2326	1	TGAGGGATGGGACGCATCCC
ZNF841	0.469084	0.999908	-0.769264	-1.02095	2328	1	TGAGCCAAGTGAAAATAGCG
hsa-mir-3135b	0.469889	0.999908	-0.768979	-1.02057	2332	1	TCTCGCTGTGTTGCCCAGGC
C15orf38	0.470292	0.999908	-0.768837	-1.02039	2334	1	TCGCCGTAAATTCGACGCCA
ANKRD18A	0.470695	0.999908	-0.768695	-1.0202	2336	1	TCCTAGGACTGTTCTACATT
FTMT	0.450124	0.999908	-0.563149	-1.01971	1989	3	GCTTCGCGCTCCCGCTGCGT,TTACTTCTCCCGGGATGACG
FAM207A	0.471903	0.999908	-0.768268	-1.01963	2342	1	GTTGCGCGCCCGAGTGCACC
PRSS45	0.472306	0.999908	-0.768126	-1.01944	2344	1	GTGATGCGGGTGTACACACC
XPNPEP1	0.472508	0.999908	-0.767984	-1.01925	2345	1	GTATGTGACCGAACCGATCC
hsa-mir-548ag-1	0.473515	0.999908	-0.7677	-1.01888	2350	1	GGTTGGTGCAAAGGTAATTG
hsa-mir-548ag-2	0.473515	0.999908	-0.7677	-1.01888	2350	1	GGTTGGTGCAAAGGTAATTG
hsa-mir-548ak	0.474119	0.999908	-0.767558	-1.01869	2353	1	GGTTGGTGCAAAAGTAACTG
hsa-mir-548an	0.47432	0.999908	-0.767415	-1.0185	2354	1	GGTTGGTGCAAAAGGAATTG
KRTAP2-1	0.47432	0.999908	-0.767273	-1.01831	2354	1	GGTGGTGGCTCAGCAGGAGG
KRTAP2-2	0.47432	0.999908	-0.767273	-1.01831	2354	1	GGTGGTGGCTCAGCAGGAGG
CLPP	0.47573	0.999908	-0.766989	-1.01793	2361	1	GGAGCGAGTGGCGCATGCCT
KRTAP9-9	0.47573	0.999908	-0.766847	-1.01774	2361	1	GGACTTGATCAGCAGCAAGA
LDOC1	0.47573	0.999908	-0.766705	-1.01755	2361	1	GCTCTCGCCATTAAACGTTT
KLK9	0.476737	0.999908	-0.76642	-1.01718	2366	1	GCGTATGCCACTACCTTGAC
ALKBH5	0.476939	0.999908	-0.766278	-1.01699	2367	1	GCCGCCGCATCTTCACCTTT
DNAJC14	0.502394	0.999908	-0.645301	-1.01683	2307	2	ATGATGTGTAGCCGATGCCA
DNM3	0.476939	0.999908	-0.766136	-1.0168	2367	1	GCAGAAACAGATCGCGTGAC
VGLL3	0.47714	0.999908	-0.765994	-1.01661	2368	1	GATTGTGTGTTTCAGTACCA
MMP2	0.477341	0.999908	-0.765852	-1.01642	2369	1	GAGTCCGTCCTTACCGTCAA
SPC25	0.503483	0.999908	-0.645039	-1.01642	2312	2	TCTTAGTCCCGCCATCTGAC
PRB1	0.478147	0.999908	-0.765567	-1.01605	2373	1	CTTCGGGACTTGTCCCCTTG
hsa-mir-526a-1	0.47855	0.999908	-0.765425	-1.01586	2375	1	CTCAGGCTGTGACCCTCTAG
TRIM38	0.478953	0.999908	-0.765283	-1.01567	2377	1	CTCAGCCCAGAAATTGCTGC
CORO7-PAM16	0.478953	0.999908	-0.765141	-1.01548	2377	1	CTCACCTTGGACACCTCGCT
TXNRD1	0.479557	0.999908	-0.764999	-1.01529	2380	1	CGGTCGTACCTGACCTACGG
MAGEF1	0.480161	0.999908	-0.764572	-1.01472	2383	1	CCGCCACCGTCCGATTCAGC
DCUN1D5	0.480363	0.999908	-0.76443	-1.01454	2384	1	CCCCCTGCTAGACTAATAAG
IRF6	0.481168	0.999908	-0.764146	-1.01416	2388	1	CCCACTCACCATTGATGTTC
APOBEC3D	0.48137	0.999908	-0.764003	-1.01397	2389	1	CCAAACGTCAGTCGAATCAC
KRT37	0.481571	0.999908	-0.763861	-1.01378	2390	1	CATGGTGGAGACCAACCACC
SSX3	0.481772	0.999908	-0.763719	-1.01359	2391	1	CATCTTTCATGCGTAATAAA
KRTAP2-4	0.482377	0.999908	-0.763435	-1.01322	2394	1	ATTGGGGTCTCAGCAGGAGG
SLC12A3	0.482779	0.999908	-0.763293	-1.01303	2396	1	ATTACGGCCCAGGCAGGCAT
OR2M3	0.483384	0.999908	-0.76315	-1.01284	2399	1	ATCTGATCGCTCCCCAACAC
RIC8B	0.483988	0.999908	-0.763008	-1.01265	2402	1	ATCGGTCCACTTGATGCTAA
hsa-mir-4688	0.484391	0.999908	-0.762866	-1.01246	2404	1	ATCCCAGGTAGGGGCAGCAG
HERC5	0.484592	0.999908	-0.762724	-1.01227	2405	1	AGACTTCGCGGGCTGGGTCG
DAW1	0.484995	0.999908	-0.762582	-1.01208	2407	1	AGAACGTGTGATTGCTGTTC
OSBPL1A	0.485599	0.999908	-0.76244	-1.01189	2410	1	AATCACTTCATTCCTCGCCA
GPLD1	0.510666	0.999908	-0.642116	-1.01181	2345	2	TTCCAGCCTGATACGCATCC,TGCCATAGAGGTTCACCGTG
TIMP4	0.486606	0.999908	-0.761871	-1.01114	2415	1	GTTAGGGGCCGAGATGGTAC
SLC39A11	0.48721	0.999908	-0.761444	-1.01057	2418	1	TTTCAGAGGCGGATCTTAGA
LPAR4	0.487412	0.999908	-0.761302	-1.01039	2419	1	TTTACAACTTCAACCGCCAC
SLC25A25	0.487613	0.999908	-0.76116	-1.0102	2420	1	TTCACGATCGTCCCCCTCTC
SPP1	0.487815	0.999908	-0.760876	-1.00982	2421	1	TGGCTTTCGTTGGACTTACT
MMP1	0.487815	0.999908	-0.760734	-1.00963	2421	1	TGAGCATCCCCTCCAATACC
hsa-mir-4307	0.513496	0.999908	-0.640694	-1.00957	2358	2	ATTATGGCCCTGAAGGAAAC,TCAGGGCCATAATACTCCCC
ITGB5	0.48862	0.999908	-0.760591	-1.00944	2425	1	TCCTGCTTCGAGAGCGAGTT
EIF3A	0.489627	0.999908	-0.760307	-1.00906	2430	1	GTATAAGAACATTTGTCAAC
KCNA10	0.489627	0.999908	-0.760165	-1.00888	2430	1	GCTGGTTGAGTCGAAGTCTG
DPY19L3	0.489829	0.999908	-0.760023	-1.00869	2431	1	GAGCTGTGACATAGATCGCC
TBR1	0.490232	0.999908	-0.759881	-1.0085	2433	1	CGGGGTGCGCCGGTCCGTGC
TAS1R1	0.490634	0.999908	-0.759596	-1.00812	2435	1	CACGCTGAGCGTCTCGCTGC
DKK4	0.491037	0.999908	-0.759312	-1.00774	2437	1	TCGAGCATGCTGCCGATTGC
AGPAT3	0.49144	0.999908	-0.75917	-1.00755	2439	1	AGTACCACGTCCAGCCGATG
hsa-mir-1290	0.491641	0.999908	-0.759028	-1.00737	2440	1	TTTCAGATTTTGGAACATTT
KRT28	0.492044	0.999908	-0.758885	-1.00718	2442	1	TCGCCGTAATCCGTTGATGT
LPPR4	0.492447	0.999908	-0.758743	-1.00699	2444	1	GCCGTACATTGAACCAACCC
MYLPF	0.492649	0.999908	-0.758601	-1.0068	2445	1	CCTTGTCTATAATACCATCA
TTPAL	0.493253	0.999908	-0.758459	-1.00661	2448	1	AGCCAGCAGTACCGCGTTCC
NUCB1	0.493656	0.999908	-0.758175	-1.00623	2450	1	TCAGAACCAGCATACATTCG
hsa-mir-4700	0.494058	0.999908	-0.758032	-1.00605	2452	1	CAGTGTGTCCTGAAATTCAC
ABHD14A	0.494461	0.999908	-0.75789	-1.00586	2454	1	ACTCCAACCCTTATCCTGTA
FBXO9	0.495267	0.999908	-0.757748	-1.00567	2458	1	AGTCACTAGACACCACCCAT
PRAMEF13	0.51872	0.999908	-0.638135	-1.00554	2382	2	ACCTGTTGCGCCACACCAGT,ATCTATCAGGATGAGCATCC
FMNL1	0.49567	0.999908	-0.757464	-1.00529	2460	1	GCAGGGAGCGCACGTCCGCC
HNRNPA0	0.495871	0.999908	-0.757179	-1.00491	2461	1	ACCGGAGTAGATATCCTCCT
NFKBIZ	0.496073	0.999908	-0.757037	-1.00472	2462	1	GGGCCCGATTCGTTGTCTGA
APOL5	0.496073	0.999908	-0.756895	-1.00454	2462	1	GGCTGTTCGAGGATCCCGTG
hsa-mir-34a	0.520026	0.999908	-0.637424	-1.00442	2388	2	GCCAGCTGTGAGTGTTTCTT,AAGAAACACTCACAGCTGGC
BAZ1B	0.496274	0.999908	-0.756753	-1.00435	2463	1	GATTGTGAAGATTCATCCTT
TTC13	0.496274	0.999908	-0.756611	-1.00416	2463	1	GACCAGTACTCTGCCGAGTG
RDH8	0.496475	0.999908	-0.756469	-1.00397	2464	1	CCCCGTGGTCACCGAGTTTG
NGF	0.496677	0.999908	-0.756184	-1.00359	2465	1	CACCCGCTGTCAACGGGATT
ADPRHL2	0.496878	0.999908	-0.756042	-1.0034	2466	1	AGGAGCCTTTCCCGTTAAAC
YEATS2	0.49708	0.999908	-0.7559	-1.00322	2467	1	AGCGACTGATTGAAGCAAGA
NSUN4	0.497281	0.999908	-0.755616	-1.00284	2468	1	AACGCTAGTGTCTTTCCCCC
MBOAT1	0.497684	0.999908	-0.755473	-1.00265	2470	1	TTTCGCATCTACTTACGTCC
ADRA2A	0.498288	0.999908	-0.755189	-1.00227	2473	1	CCCGACGGCCGTGAGCGTGT
RCAN1	0.498691	0.999908	-0.755047	-1.00208	2475	1	GCGTGCCAGTTCAGCTGAGG
SIDT1	0.521768	0.999908	-0.635893	-1.00201	2396	2	GCGACCCCTTCGACGCTGCC
IL5RA	0.498892	0.999908	-0.754905	-1.00189	2476	1	TCTGTAGGATATGATCATCG
C2orf61	0.498892	0.999908	-0.754763	-1.00171	2476	1	TAATTACCTGGAAGCATATT
INSL5	0.500101	0.999908	-0.75462	-1.00152	2482	1	TCCAGCGCAAAACCTTCCGA
hsa-mir-6893	0.500504	0.999908	-0.754478	-1.00133	2484	1	CCCTGGCAGGTGAAGGCAGC
ATL3	0.500705	0.999908	-0.754336	-1.00114	2485	1	AATCCTGTTAACGGTTCTTC
hsa-mir-502	0.500906	0.999908	-0.754052	-1.00076	2486	1	CAATGCAATGCACCTGGGCA
GPN3	0.500906	0.999908	-0.75391	-1.00057	2486	1	CAGCACATTTGCAAATCGCG
NonTargetingControlGuideForHuman_0850	0.500906	0.999908	-0.753767	-1.00039	2486	1	AGGATGGATTGAGCAGCGGT
POLE2	0.501108	0.999908	-0.753625	-1.0002	2487	1	AAACATGATTGAACGATCTG
RBMXL1	0.501511	0.999908	-0.753341	-0.999819	2489	1	ATCTCTACTCAAGTTGTGAC
hsa-mir-4692	0.501511	0.999908	-0.753199	-0.99963	2489	1	TGATACCCACACTGCCTGGG
RBP2	0.501913	0.999908	-0.753057	-0.999442	2491	1	TGAGACGTACTGCAATCTTG
FGD5	0.501913	0.999908	-0.752914	-0.999253	2491	1	TCTGCTCTTCATCCGACGTA
BAIAP2L2	0.502115	0.999908	-0.752772	-0.999064	2492	1	GGGCACGCTCCCCAATCTTC
HMP19	0.503122	0.999908	-0.75263	-0.998876	2497	1	GCCGAAAATCGCTGAATTTA
LOC653486	0.503525	0.999908	-0.752488	-0.998687	2499	1	GACCCCAGAGGAGCTCTATG
SCGB1C1	0.503525	0.999908	-0.752488	-0.998687	2499	1	GACCCCAGAGGAGCTCTATG
CD5	0.503927	0.999908	-0.752346	-0.998498	2501	1	CCGTTCCAACTCGAAGTGCC
USP6	0.50433	0.999908	-0.752204	-0.99831	2503	1	CATACTTATGAAGTATGACA
CLPSL1	0.504532	0.999908	-0.752061	-0.998121	2504	1	CAATTGCGAGTCGCACTGCG
ZC3H6	0.504733	0.999908	-0.751919	-0.997932	2505	1	ACTTAGCGTGGACATATATC
APOL4	0.526121	0.999908	-0.6333	-0.997919	2416	2	AAATCTTTGTCGTCTGCATC,AGGCTGCGTCATCGCCAATG
DDX43	0.505136	0.999908	-0.751777	-0.997743	2507	1	AAAGGCGTCATCAAATGTGC
hsa-mir-3913-1	0.505337	0.999908	-0.751493	-0.997366	2508	1	CTTGATGTCTGCCAAGGTTT
hsa-mir-3913-2	0.505337	0.999908	-0.751493	-0.997366	2508	1	CTTGATGTCTGCCAAGGTTT
IFIH1	0.505539	0.999908	-0.751351	-0.997177	2509	1	CGAATTCCCGAGTCCAACCA
NCF1	0.505942	0.999908	-0.751208	-0.996989	2511	1	ACGCGCACAGCATCCACCAG
SENP8	0.505942	0.999908	-0.751066	-0.9968	2511	1	CAACTCAGTTCACGCAAAGC
TMEM150C	0.506747	0.999908	-0.750782	-0.996423	2515	1	TATGGTGCATGCTTCACACC
C2orf73	0.50715	0.999908	-0.75064	-0.996234	2517	1	TTAGTACCACTTGCCTCTCC
NonTargetingControlGuideForHuman_0917	0.507351	0.999908	-0.750355	-0.995857	2518	1	ACTGCTGCTGACATCTCTTA
RAD23A	0.507553	0.999908	-0.750213	-0.995668	2519	1	TCGATGCGATAGTCCCTGAT
COL9A3	0.507754	0.999908	-0.750071	-0.995479	2520	1	CAGGGTCTGACTGGACGAGA
IRF2BPL	0.508359	0.999908	-0.749929	-0.995291	2523	1	AAGGTACATTCGACCCGACT
GRAMD1C	0.50856	0.999908	-0.749787	-0.995102	2524	1	GTCCTTAATAGTCCACTTAC
KCNC2	0.529168	0.999908	-0.631452	-0.995007	2430	2	TTATCAGGTGACGACAGTAC,TACTGGTTACACGCAAGCCG
FA2H	0.508761	0.999908	-0.749645	-0.994913	2525	1	CTGGCTGGAGCAGTACTACG
EBF4	0.508761	0.999908	-0.749502	-0.994725	2525	1	CACAGCCTTCATCGACTTCG
CLCN7	0.509164	0.999908	-0.749218	-0.994347	2527	1	GGACGCCCACCTCATACTTG
NEK10	0.509768	0.999908	-0.749076	-0.994159	2530	1	GCACTATCGAAGTTAATGGC
ACOT8	0.510775	0.999908	-0.748649	-0.993592	2535	1	CTGTTCGTGTCCGCTCCACT
CFP	0.511178	0.999908	-0.748507	-0.993404	2537	1	CTCAGAGCACGTCACCGAAC
XAB2	0.51138	0.999908	-0.748365	-0.993215	2538	1	CGATCATGCTCTCCTCGAAC
TSEN15	0.511782	0.999908	-0.748223	-0.993026	2540	1	CCAAGTTTATGTAGCGTTCT
hsa-mir-3147	0.511782	0.999908	-0.748081	-0.992838	2540	1	CACCTCGCCCTTGTCCAACT
hsa-mir-4454	0.531998	0.999908	-0.629888	-0.992542	2443	2	TGAAATTTGGTGCCGTGACT,ACACGGACACGCATGAAATT
hsa-mir-623	0.512185	0.999908	-0.747796	-0.99246	2542	1	AGTAGAAGCATCCCTTGCAG
PCSK5	0.51279	0.999908	-0.747654	-0.992272	2545	1	AGGTCAGTTATCTCGAGCAG
LENG1	0.513192	0.999908	-0.747512	-0.992083	2547	1	AGGACAATGTCGCCCGCGTG
CCNG2	0.513192	0.999908	-0.74737	-0.991894	2547	1	AGCCTTGTGCCTTCTCAATT
PRPH2	0.513192	0.999908	-0.747228	-0.991706	2547	1	CACCATCCAGCGACGTCTGT
ODF2	0.513797	0.999908	-0.747086	-0.991517	2550	1	ACACGTGCAACTCGCTGACA
FAM120A	0.514199	0.999908	-0.746943	-0.991328	2552	1	TGACTATGTACGCAACATTC
HDAC2	0.514401	0.999908	-0.746801	-0.99114	2553	1	TCCGTAATGTTGCTCGATGT
ACTR3B	0.515408	0.999908	-0.746517	-0.990762	2558	1	GGTGCCACAGTCCACCACGC
TXNL4B	0.515609	0.999908	-0.746375	-0.990574	2559	1	CCCACAAACTTAGTGTGATC
POGLUT1	0.516213	0.999908	-0.745806	-0.989819	2562	1	CAATGTACGAGATTATCCTC
TUBD1	0.517019	0.999908	-0.745664	-0.98963	2566	1	TCAAGTCCTCGCACATCAGC
PRPH	0.517623	0.999908	-0.745522	-0.989442	2569	1	CCACCTCGCACGTTAGACTC
EIF2A	0.517623	0.999908	-0.74538	-0.989253	2569	1	ATTGACATAGGTGTCCATCC
ACTL6A	0.518026	0.999908	-0.745237	-0.989064	2571	1	TCGTTCTACTGGGCTGATTT
RHBDL3	0.518429	0.999908	-0.745095	-0.988875	2573	1	CTAGTGACACCCCATTGTAG
CHST7	0.51863	0.999908	-0.744953	-0.988687	2574	1	TTCGCGCTCAACATGACTCG
CAPN2	0.52004	0.999908	-0.744527	-0.988121	2581	1	TGATCCGCATCCGAAATCCC
IGBP1	0.520645	0.999908	-0.744384	-0.987932	2584	1	TATCGCAGCTCGACTTGTTC
TIAM2	0.521249	0.999908	-0.744242	-0.987743	2587	1	TACTTTGACAGTCGCTCTGA
ZBTB34	0.521853	0.999908	-0.7441	-0.987555	2590	1	GCTAAACGAACTCCGCCTGC
LMNB2	0.522054	0.999908	-0.743958	-0.987366	2591	1	CGCGGTCGATGTAGTGCGCC
FGF9	0.522457	0.999908	-0.743674	-0.986989	2593	1	CCACGCCTCGAATGCTGACC
hsa-mir-4711	0.538093	0.999908	-0.626308	-0.986902	2471	2	GCCAGAAGACATGAGCCCTT
STAC2	0.523061	0.999908	-0.743389	-0.986611	2596	1	AGAGGGAGCGCTTGAATCGC
FAAH	0.523867	0.999908	-0.743247	-0.986423	2600	1	ACTACGCTGTCGCACTCCGC
KLC2	0.524471	0.999908	-0.742963	-0.986045	2603	1	CTTGGCATTGTCGAGCCACC
NUP62CL	0.52568	0.999908	-0.742821	-0.985857	2609	1	GCAACTCCTGTGATGACATA
BMP1	0.526083	0.999908	-0.742536	-0.985479	2611	1	TGCTCACCCGCAAGGTCGAT
IFIT3	0.526687	0.999908	-0.742394	-0.985291	2614	1	CACTGCGGAGGACATCTGTT
RMDN3	0.526687	0.999908	-0.742252	-0.985102	2614	1	CTTACCTCCTTCGTGACATC
GNAT3	0.527895	0.999908	-0.741968	-0.984725	2620	1	TGGTGGCATGACACCTCAAC
TMEM255A	0.528097	0.999908	-0.741825	-0.984536	2621	1	CATGTCCCTGCCCGATTCCA
IFNA2	0.528701	0.999908	-0.741683	-0.984347	2624	1	GTTTGGCAACCAGTTCCAAA
AHNAK2	0.528902	0.999908	-0.741541	-0.984158	2625	1	CGGATGAGGGCATTCGACCA
PC	0.529104	0.999908	-0.741399	-0.98397	2626	1	CTGAAGTTCCGAACAGTCCA
NTN5	0.541794	0.999908	-0.624403	-0.9839	2488	2	ATCGTAGCATGGGTCCGCAG
HNRNPAB	0.529507	0.999908	-0.741257	-0.983781	2628	1	CCCTCTTGACCGTCCAGTGT
FHL3	0.529507	0.999908	-0.741115	-0.983592	2628	1	AGCTGCAAGCGCCCCATCGT
OR5B3	0.529507	0.999908	-0.740972	-0.983404	2628	1	AACAACTGTGTGTGCTCGTC
MOS	0.530312	0.999908	-0.74083	-0.983215	2632	1	CCACGCGCACGATGTTATCG
hsa-mir-6876	0.530916	0.999908	-0.740688	-0.983026	2635	1	AAGGAGACAGGCAGTTCAGG
TMEM144	0.531319	0.999908	-0.740546	-0.982838	2637	1	TGGCAGCACAAAGAACCCAC
LRRC43	0.531319	0.999908	-0.740404	-0.982649	2637	1	GCCTTGGTGCCCTACTACCG
HADHB	0.5431	0.999908	-0.623548	-0.982553	2494	2	ATCTTCCCACTGCATCAAAA
AMPD3	0.531521	0.999908	-0.740262	-0.98246	2638	1	CATCTACGGCCGCAGTCCTG
SLC20A1	0.531521	0.999908	-0.740119	-0.982272	2638	1	ACCTTACGTCATTGCCACCA
EVI5L	0.531521	0.999908	-0.739977	-0.982083	2638	1	CATCCATGTATGCCTCGTCC
NOX1	0.531521	0.999908	-0.739835	-0.981894	2638	1	TATATGATCTGCCTACATAC
HDAC10	0.532326	0.999908	-0.739693	-0.981706	2642	1	CGCTGTTGCCCTGACAACGC
NonTargetingControlGuideForHuman_0427	0.532326	0.999908	-0.739551	-0.981517	2642	1	ATCGTTGCTGACAGGATCTA
RNF213	0.532528	0.999908	-0.739409	-0.981328	2643	1	ACTCACTTCTTGGACGGTCC
LHPP	0.532729	0.999908	-0.739266	-0.98114	2644	1	TCCCTACATGAAGGCGCTTG
CDK7	0.54397	0.999908	-0.622636	-0.981116	2498	2	CTAGTTTGCCACCGTTTACA,TTGCAGCTCCTTGATGCTTT
DPH2	0.532931	0.999908	-0.739124	-0.980951	2645	1	AAGGGCACGAAGACGATATC
NPSR1	0.544406	0.999908	-0.622494	-0.980891	2500	2	CTACGCCTCTACCTACGTCC,TGTGGCCTGACGACTCCTAC
NonTargetingControlGuideForHuman_0065	0.533736	0.999908	-0.73884	-0.980574	2649	1	CGCGGCCCACGCGTCATCGC
PARS2	0.53434	0.999908	-0.738698	-0.980385	2652	1	AGAGCACCCGGTCTTCCCGA
OPA3	0.534743	0.999908	-0.738556	-0.980196	2654	1	ACCCTCGTTCAGCGGCTTGA
THEGL	0.535347	0.999908	-0.738413	-0.980007	2657	1	TACCTGACCGTGATGCCCAT
INPP4A	0.535347	0.999908	-0.738271	-0.979819	2657	1	TTTACAAGAAGTCATCAACG
GSTM2	0.537362	0.999908	-0.737703	-0.979064	2667	1	GCATACGGCTGTCCATAAAC
RSRC2	0.537563	0.999908	-0.73756	-0.978875	2668	1	CAAGATCTAGGTCTCGTGAA
hsa-mir-6744	0.537563	0.999908	-0.737418	-0.978687	2668	1	GGGACTCACGTGGATGACAG
ANXA2	0.537966	0.999908	-0.737276	-0.978498	2670	1	TATTTCCATAGGTGTGGATG
FBXO15	0.538167	0.999908	-0.737134	-0.978309	2671	1	TGCGTACCTGAGGGCCTCTT
hsa-mir-1244-2	0.538369	0.999908	-0.736992	-0.978121	2672	1	TTAGCTGTACTATAAGTAGT
hsa-mir-1244-3	0.538369	0.999908	-0.736992	-0.978121	2672	1	TTAGCTGTACTATAAGTAGT
OSTN	0.539778	0.999908	-0.736565	-0.977555	2679	1	GGCAAGTGCACATTTCATCC
LDLRAP1	0.53998	0.999908	-0.736423	-0.977366	2680	1	GCTCCACTAGCGTCATGCCC
SERPINA3	0.540181	0.999908	-0.736139	-0.976989	2681	1	CGGATTAGCCTCCGCCAACG
hsa-mir-6864	0.549195	0.999908	-0.619935	-0.976859	2522	2	ATGCCATTATGTGGGTCATG,GGAACCCCAGGAAAGTTGAA
VAV3	0.540383	0.999908	-0.735997	-0.9768	2682	1	CATTCCAAACGTCTCACAAC
CXorf38	0.541188	0.999908	-0.735712	-0.976423	2686	1	CAACTCCTGCGATCACTTCG
CASK	0.54139	0.999908	-0.73557	-0.976234	2687	1	CCCCTTAGGAGCAGTCTCAC
LPA	0.541994	0.999908	-0.735428	-0.976045	2690	1	TGACACCACATCAACATAAT
FAM21B	0.542397	0.999908	-0.735286	-0.975857	2692	1	TCTGCCTCAGCCTTGAGTAC
FAM21C	0.542397	0.999908	-0.735286	-0.975857	2692	1	TCTGCCTCAGCCTTGAGTAC
DEFB114	0.543404	0.999908	-0.735144	-0.975668	2697	1	TATGTGACCTTCATTCTACC
CCDC24	0.544411	0.999908	-0.734859	-0.97529	2702	1	GAACGTGTCCAACATTGACC
TEX13A	0.545217	0.999908	-0.734717	-0.975102	2706	1	CGGGTTCCGGCATAGCAACG
NEK3	0.551154	0.999908	-0.618797	-0.975066	2531	2	AGGACACTTGTATATTGTGA,GGCATTTGCTTGTACCTATG
EBLN1	0.545418	0.999908	-0.734575	-0.974913	2707	1	CCGAAATCCCATAACCGCGA
CEP112	0.545619	0.999908	-0.734433	-0.974724	2708	1	TTGAAGCTCGCCTTAATAGT
EGFL6	0.546425	0.999908	-0.734291	-0.974536	2712	1	TTAGCATCGGCACGTCAGCC
FAM96B	0.547231	0.999908	-0.734148	-0.974347	2716	1	GATGGACGTGCACATTACTC
S100A13	0.548036	0.999908	-0.733722	-0.973781	2720	1	AGCTCAAGTTCAATGAGTAC
hsa-mir-3938	0.548439	0.999908	-0.73358	-0.973592	2722	1	GGTCAGGTTGGATGGCTCCA
ACSM5	0.549043	0.999908	-0.733295	-0.973215	2725	1	TCTTACATTCAGGATAACTT
GJA8	0.549648	0.999908	-0.733153	-0.973026	2728	1	TACGGTTAGATCGTCTGACC
CECR2	0.549648	0.999908	-0.733011	-0.972838	2728	1	CCATTGGGTGAAGACAATTC
ATP2B3	0.549648	0.999908	-0.732869	-0.972649	2728	1	GGCACTCACCGTACTTGACC
GNPAT	0.550453	0.999908	-0.732727	-0.97246	2732	1	GAGTCGGAGCTCATATAACT
KRTAP1-3	0.550655	0.999908	-0.732585	-0.972272	2733	1	TGTCCCACTGGTGGAGCAGC
FOXA1	0.550856	0.999908	-0.732442	-0.972083	2734	1	CAGCTACTACGCAGACACGC
MANEAL	0.551057	0.999908	-0.732158	-0.971706	2735	1	GCAGGTCCGAGTAGACGCGC
DHRS4L2	0.554201	0.999908	-0.616664	-0.971705	2545	2	AAGCCTAATGGATGTCACCG,CGACCACGTGGGCCCTGTCC
C4orf45	0.551057	0.999908	-0.732016	-0.971517	2735	1	GCAACCAAAACCTCATGTCC
CTPS1	0.551259	0.999908	-0.731874	-0.971328	2736	1	TAAGTTCCCGAACACTATTC
TUB	0.552669	0.999908	-0.731447	-0.970762	2743	1	GGCGGGTGTTACTATTTAGC
TACR3	0.552669	0.999908	-0.731305	-0.970573	2743	1	GAGCTCTAGCTCATCATAGC
SNRPD1	0.553273	0.999908	-0.731021	-0.970196	2746	1	CCGCTAGGATGAAGCTCGTG
PLP1	0.553474	0.999908	-0.730879	-0.970007	2747	1	CCCTAACTCACCATACATTC
LUC7L	0.553877	0.999908	-0.730736	-0.969819	2749	1	ATGTACCAAAATCCACGACT
KLHL26	0.554884	0.999908	-0.730452	-0.969441	2754	1	AGCACCACCGCTGCTACCGC
RAB9B	0.554884	0.999908	-0.73031	-0.969253	2754	1	AGAGTTCTTAAATCGAGATC
PTPLAD2	0.55569	0.999908	-0.729741	-0.968498	2758	1	TATCCTATGCTGTCTTGACA
hsa-mir-4290	0.556697	0.999908	-0.729457	-0.968121	2763	1	TGACCCTCCCTTCACCTTCT
NOVA1	0.556898	0.999908	-0.729315	-0.967932	2764	1	TCAGTGCTTCAACCGTTCCC
TANK	0.556898	0.999908	-0.729173	-0.967743	2764	1	GCAGAGAATACGTGAACAAC
DNAI2	0.556898	0.999908	-0.72903	-0.967555	2764	1	TTGAACTCCAACGTCACGAG
hsa-mir-6848	0.557704	0.999908	-0.728746	-0.967177	2768	1	CATGGCCCATCCCAGCCCCC
hsa-mir-411	0.560514	0.999908	-0.613678	-0.967	2574	2	GATTTGATACTGAGGGTTAG,TATCTGTGACGTATGTAACA
KRT82	0.557905	0.999908	-0.728604	-0.966989	2769	1	CTGCACGAGTGCCTCTGCGT
GTF2H2	0.558912	0.999908	-0.728462	-0.9668	2774	1	TTCCAAGTCGAACTTGTCCA
GTF2H2C	0.558912	0.999908	-0.728462	-0.9668	2774	1	TTCCAAGTCGAACTTGTCCA
BANP	0.559114	0.999908	-0.72832	-0.966611	2775	1	ATCGCACTTTGTTGCACGTC
HRH1	0.559517	0.999908	-0.728177	-0.966422	2777	1	ATCTGAGTCCGTTCGAGAGA
MS4A13	0.559718	0.999908	-0.728035	-0.966234	2778	1	ACAAAGTATCCGACTCGATC
KIAA0513	0.559919	0.999908	-0.727893	-0.966045	2779	1	TGTCTTACCGATGTGGTAGT
PTPRQ	0.560322	0.999908	-0.727751	-0.965856	2781	1	TCTGACCCTGTTAAGACTTT
VWDE	0.560322	0.999908	-0.727609	-0.965668	2781	1	TAGCCCATACATCCCTGAGT
GJA1	0.560322	0.999908	-0.727467	-0.965479	2781	1	GTCGTGCCAGCAGCAGACCT
EPPK1	0.560322	0.999908	-0.727324	-0.96529	2781	1	GCCCGTAGTGGCACGCTCAG
ESR1	0.560926	0.999908	-0.727182	-0.965102	2784	1	GCCAGACGAGACCAATCATC
LRRC8E	0.562135	0.999908	-0.726756	-0.964536	2790	1	CAAACCCTGGTGGGACGTGC
hsa-mir-1253	0.562336	0.999908	-0.726614	-0.964347	2791	1	AGGCTGATCTTCTCCCCTTT
MSI1	0.562739	0.999908	-0.726471	-0.964158	2793	1	ACTCAGTTGGCAGACTACGC
DNPEP	0.562739	0.999908	-0.726329	-0.96397	2793	1	GACTCCGGTTCACGAACTTG
hsa-mir-3936	0.563142	0.999908	-0.726187	-0.963781	2795	1	TTGCTGCCAAGTGCATCTGT
MRGPRD	0.56552	0.999908	-0.611536	-0.963624	2597	2	GCTCCTCGCGAAGCGCCTGT
ZC2HC1B	0.563343	0.999908	-0.726045	-0.963592	2796	1	ATCAGGAGTACCTTGGATTG
OR52B4	0.563746	0.999908	-0.725903	-0.963404	2798	1	GCTGAGTGATGCAACGATCC
GABRG1	0.563948	0.999908	-0.725761	-0.963215	2799	1	TCAAGCTTACCTCCTATATC
YWHAB	0.56435	0.999908	-0.725618	-0.963026	2801	1	CTGCTGGGAGTTCGACACAG
hsa-mir-1257	0.564753	0.999908	-0.725476	-0.962838	2803	1	AGGCACAGGGCAAGCGTGGT
VEGFB	0.564955	0.999908	-0.725334	-0.962649	2804	1	GCGCTGCACAGTCACGCAGC
TOR1AIP2	0.565559	0.999908	-0.725192	-0.96246	2807	1	CCCTGTGATTCTTGTCGTCC
hsa-mir-6777	0.56576	0.999908	-0.724908	-0.962083	2808	1	GGCCAGGAGAGTGGAGGCTC
hsa-mir-7851	0.566566	0.999908	-0.724623	-0.961705	2812	1	CACCTGTATTCCCAGCTACT
LSM2	0.566767	0.999908	-0.724481	-0.961517	2813	1	CACACAGTTGCTACAGGATG
OSTM1	0.567573	0.999908	-0.724197	-0.961139	2817	1	TGAACATCACTCGAAAACTA
RNASEH2B	0.568177	0.999908	-0.724055	-0.960951	2820	1	TATCCACCACAACTTGATCA
DDX58	0.568781	0.999908	-0.72377	-0.960573	2823	1	TGCTTAGATTTGCTCTACTA
SLC38A6	0.568785	0.999908	-0.609598	-0.960571	2612	2	ATACCGGTGTCTTTGGATTT
C1orf159	0.568983	0.999908	-0.723628	-0.960385	2824	1	TACGGAAGCCGCGCTACGTC
FBXO42	0.569221	0.999908	-0.609342	-0.960167	2614	2	AGCCGTACCTATCCTTATCC
MLLT6	0.569587	0.999908	-0.723344	-0.960007	2827	1	TGCTCCATGTTAGTCGTCCC
XKR8	0.56999	0.999908	-0.723059	-0.95963	2829	1	GCCGCCGTCCAGTATGCGCT
HS3ST5	0.5714	0.999908	-0.722917	-0.959441	2836	1	CTGTATCTAGTCGCCAGAGT
NQO1	0.571803	0.999908	-0.722633	-0.959064	2838	1	CGCAGACCTTGTGATATTCC
ZNF668	0.572608	0.999908	-0.722491	-0.958875	2842	1	CGAACGTCTTGTCACATTGC
ERCC3	0.57281	0.999908	-0.722349	-0.958687	2843	1	CCTCAGCCAAGATGTTCCGA
MINA	0.573212	0.999908	-0.722206	-0.958498	2845	1	CCACGCTGTACTCTCGTGCC
RUNX1	0.573817	0.999908	-0.722064	-0.958309	2848	1	CACTTCGACCGACAAACCTG
LRMP	0.574824	0.999908	-0.72178	-0.957932	2853	1	AGACACACTTCATCGACAGA
ANKS1A	0.575025	0.999908	-0.721638	-0.957743	2854	1	TTTGTTTGGCAAGACCGATG
MAMDC4	0.575227	0.999908	-0.721496	-0.957554	2855	1	ACTAATGTCCCGCCAGCCGC
TIMM10	0.575227	0.999908	-0.721353	-0.957366	2855	1	TGATGGCCGATATGTACAAC
PIDD	0.575428	0.999908	-0.721069	-0.956988	2856	1	CCACCACTTCACGGCAGCGC
P2RY2	0.575629	0.999908	-0.720927	-0.9568	2857	1	GTCCGTGCGCACCATCGCCG
ARID3C	0.575831	0.999908	-0.720785	-0.956611	2858	1	AGTGAACCGCGTGCCCATCA
CNOT3	0.573357	0.999908	-0.606996	-0.95647	2633	2	TTCAAACTGCTCCACGCCCT,GATTGATCGCTGCCTCAAGA
hsa-mir-7153	0.576435	0.999908	-0.720643	-0.956422	2861	1	GTTCTCACCACACCGAGCAC
KIAA1586	0.577442	0.999908	-0.720358	-0.956045	2866	1	TGTTCAATATACTCGAAATG
hsa-mir-671	0.577442	0.999908	-0.720216	-0.955856	2866	1	CGGCTGGCAGGTGAACTGGC
SHOX_X	0.577442	0.999908	-0.720074	-0.955668	2866	1	TCCTACCTGCACGCGCGCCT
SHOX_Y	0.577442	0.999908	-0.720074	-0.955668	2866	1	TCCTACCTGCACGCGCGCCT
LTC4S	0.577442	0.999908	-0.719932	-0.955479	2866	1	GGCGCGCGAACAGGTAGACC
SCARB2	0.577845	0.999908	-0.71979	-0.95529	2868	1	GCCTCACCTTCTCGATACTC
NSUN5	0.578248	0.999908	-0.719647	-0.955102	2870	1	GAAATAATCAACTACATCAT
C17orf104	0.578449	0.999908	-0.719363	-0.954724	2871	1	CGATGTGTAGCAATCGTAGA
TAF7L	0.578651	0.999908	-0.719221	-0.954536	2872	1	AGGAACATGCTTGTACTGTC
TCEB3C	0.578852	0.999908	-0.719079	-0.954347	2873	1	ACTCTCCGCGCCAGCGCTCC
RETSAT	0.579255	0.999908	-0.718794	-0.95397	2875	1	AGATGTAGCTGAGTACTGCC
REL	0.579658	0.999908	-0.718652	-0.953781	2877	1	CCTCATCCTCATGATTTAGT
IRF2BP2	0.579859	0.999908	-0.71851	-0.953592	2878	1	GACCGTGCGCGACACGCTGC
INPP5D	0.579859	0.999908	-0.718368	-0.953404	2878	1	CTCAGGACCCTCGTGCAGCA
TPRA1	0.579859	0.999908	-0.718226	-0.953215	2878	1	GAGGAGCTTCTACGTGTATG
PGAP3	0.580262	0.999908	-0.718084	-0.953026	2880	1	GTTCTTTCAAGAGCCGGCAT
C3orf80	0.577057	0.999908	-0.604802	-0.953013	2650	2	CAAGTATCTGCCCACCTACG
STAM2	0.580866	0.999908	-0.717941	-0.952837	2883	1	GTTCGATGACGTACCATTCT
LATS1	0.581269	0.999908	-0.717799	-0.952649	2885	1	GCAGCCATCTGCTCTCGTCG
TBRG1	0.581672	0.999908	-0.717657	-0.95246	2887	1	ACGGCCTCGCTTCCTCGCCG
NonTargetingControlGuideForHuman_0565	0.581873	0.999908	-0.717515	-0.952271	2888	1	CCTAAGGGGTACCACCATGG
H2AFB1	0.578363	0.999908	-0.604252	-0.952146	2656	2	GTCAGAAGCTAGTCCTCGCC
H2AFB2	0.578363	0.999908	-0.604252	-0.952146	2656	2	GTCAGAAGCTAGTCCTCGCC
H2AFB3	0.578363	0.999908	-0.604252	-0.952146	2656	2	GTCAGAAGCTAGTCCTCGCC
EGR3	0.582477	0.999908	-0.717231	-0.951894	2891	1	CGACCGCCGTTTCAGCCGTT
GDF7	0.582477	0.999908	-0.717088	-0.951705	2891	1	ATTCCGGGAGATCCGCGCCC
VPS33B	0.58288	0.999908	-0.716946	-0.951517	2893	1	AGAAAGATATGTCCAATCTC
CDKL4	0.583484	0.999908	-0.716804	-0.951328	2896	1	AAATCTTGTGAACCTCATCG
hsa-mir-1273c	0.583686	0.999908	-0.716662	-0.951139	2897	1	AGGGTCTCGTTTTGTCGCCC
CPA2	0.584089	0.999908	-0.71652	-0.950951	2899	1	TGACGAAGGGAACTCGGACG
PDE6H	0.58429	0.999908	-0.716378	-0.950762	2900	1	TTGCATGAGCTCGCTCAGTT
CSF3R	0.584491	0.999908	-0.716235	-0.950573	2901	1	TGCAGATACGCTGCATCCGC
GP1BB	0.585096	0.999908	-0.716093	-0.950385	2904	1	TCCAGACTCACCGGAGCCCA
GGN	0.585498	0.999908	-0.715809	-0.950007	2906	1	GTAGCTGTAGCTCGTTCGCG
VPS37B	0.586103	0.999908	-0.715667	-0.949819	2909	1	GGGGTGGCTAAGCGTCCCGC
ARID3B	0.586707	0.999908	-0.715525	-0.94963	2912	1	GGGATTGCAGCTGTATGAAC
YDJC	0.586707	0.999908	-0.715382	-0.949441	2912	1	GCGCTTTACGCGACTGCCGC
SIN3B	0.581628	0.999908	-0.602446	-0.9493	2671	2	GTACTTCCCCACTGCAGCGA,TCTTCTAGCATCGATACTCC
RNASE4	0.587915	0.999908	-0.714956	-0.948875	2918	1	CACCTGTGGGTTACCCTCAC
HNF1A	0.589124	0.999908	-0.714672	-0.948498	2924	1	AGACACGCACCTCCGTGACG
UGT2A3	0.589325	0.999908	-0.714529	-0.948309	2925	1	ACCTGCCAAAGCTTTGCCTA
GLRX3	0.589728	0.999908	-0.714387	-0.94812	2927	1	CGGCTCAGCCGGGCAGTTTG
SCCPDH	0.590131	0.999908	-0.714103	-0.947743	2929	1	TTACTGGTCCTACGCAATTG
PSMD3	0.590332	0.999908	-0.713676	-0.947177	2930	1	CATGCCGAAGCGTAGCTGTC
TAPBPL	0.590332	0.999908	-0.713534	-0.946988	2930	1	GCCAAGCTCAGTCGTACTTT
HMX3	0.590937	0.999908	-0.713392	-0.9468	2933	1	CCCCGTCTACTACTCGCACC
EIF2B3	0.591138	0.999908	-0.71325	-0.946611	2934	1	TTGAACCTGCTTGAGCGTGT
TMEM63B	0.591339	0.999908	-0.713108	-0.946422	2935	1	GAAGTACAGCTTTCCCCGCT
CDC42EP3	0.591742	0.999908	-0.712966	-0.946234	2937	1	TTTCCCTTGATGAGCTCGCA
PIGK	0.592145	0.999908	-0.712823	-0.946045	2939	1	TTGTGACTAAACACTGTAGC
PPM1M	0.592548	0.999908	-0.712681	-0.945856	2941	1	TTCCCTCAGGCTCGGTTACT
REV3L	0.593353	0.999908	-0.712397	-0.945479	2945	1	TACCTCTATGTGCCATACGA
FUNDC1	0.593756	0.999908	-0.712255	-0.94529	2947	1	TAACGCCACCCATTACAATC
RDH10	0.594159	0.999908	-0.712113	-0.945102	2949	1	GTTCAGTACTGCCGGAGTTG
CAPRIN2	0.594159	0.999908	-0.71197	-0.944913	2949	1	GGTGTTCTGTTCGCTCTGCA
DEXI	0.594361	0.999908	-0.711828	-0.944724	2950	1	GGGCCTCGTCTTCCTGCCCG
FOLR3	0.594361	0.999908	-0.711686	-0.944536	2950	1	GAATCAATAATCCCACGAGA
CALM3	0.594361	0.999908	-0.711544	-0.944347	2950	1	GAACGGGACCATTGACTTCC
RNF17	0.586417	0.999908	-0.599175	-0.944147	2693	2	TGCTTAACTGTTCGAAACTA,ACTGCTGATCAGCTAACTAC
NonTargetingControlGuideForHuman_0497	0.594763	0.999908	-0.71126	-0.943969	2952	1	CTGCCCCAGGCGTAATCCTC
NonTargetingControlGuideForHuman_0713	0.594763	0.999908	-0.711117	-0.943781	2952	1	CGGAGCTTAGCGTGGGGGCG
PYY	0.595166	0.999908	-0.710975	-0.943592	2954	1	CCCAGATGGTGTTCGTGCGC
DBT	0.596173	0.999908	-0.710691	-0.943215	2959	1	ACCATCACTAGTCGTTATGA
PGRMC1	0.596375	0.999908	-0.710549	-0.943026	2960	1	CGCGCACGATCTTGTAGAGC
CSMD1	0.587941	0.999908	-0.598322	-0.942803	2700	2	GCATAGTTCGGATACCCGTG,CTCGCCCGTGATGATGATCC
WDR72	0.596777	0.999908	-0.710264	-0.942649	2962	1	TTCCAGTCACAATCGTTCGC
KCTD15	0.596777	0.999908	-0.710122	-0.94246	2962	1	CCGCCCACATCGATGTGCAC
ADIPOQ	0.596979	0.999908	-0.70998	-0.942271	2963	1	TAGGCAAAGTAGTACAGCCC
LUZP6	0.59718	0.999908	-0.709696	-0.941894	2964	1	CTATGCGTAGAAGAACTACT
USP24	0.59718	0.999908	-0.709554	-0.941705	2964	1	ATACCATTGTAAGCACACCC
NUP50	0.589029	0.999908	-0.597524	-0.941545	2705	2	ATACTTCAGTCTGACACTGG
AKAP17A_X	0.597784	0.999908	-0.709269	-0.941328	2967	1	AGGACTCACCTTGATGTTGC
AKAP17A_Y	0.597784	0.999908	-0.709269	-0.941328	2967	1	AGGACTCACCTTGATGTTGC
PTPRK	0.598187	0.999908	-0.709127	-0.941139	2969	1	ATGCTGTGCATAACAAGTTA
hsa-mir-4778	0.598187	0.999908	-0.708985	-0.940951	2969	1	CTCTTCTTCCTTTACAGAAT
hsa-mir-370	0.59859	0.999908	-0.708701	-0.940573	2971	1	CACAGCTCACGAGTGCCTGC
SATL1	0.599396	0.999908	-0.708558	-0.940385	2975	1	ACTACTTTACATACGACTCA
BTBD16	0.599396	0.999908	-0.708416	-0.940196	2975	1	TTTGGGCAAACGCCACCGGT
CACFD1	0.599396	0.999908	-0.708274	-0.940007	2975	1	TTTCAAGCTTGCGCGATCTC
HOXC12	0.600201	0.999908	-0.70799	-0.93963	2979	1	TTGGTATCGCCGTTGAACCC
DYNC2LI1	0.600403	0.999908	-0.707848	-0.939441	2980	1	TTGGATTCTTTCGGTCAAAT
HIST1H2BC	0.600604	0.999908	-0.707705	-0.939252	2981	1	TTGGAATGTTTACTTGGAGC
OR10G3	0.601007	0.999908	-0.707563	-0.939064	2983	1	TTGACTGCGTTTATCCTGAC
TMEM99	0.601007	0.999908	-0.707421	-0.938875	2983	1	TTCTTTGTGCTTGCGGTCAT
XG	0.601611	0.999908	-0.707279	-0.938686	2986	1	TTCTCGGGCTGTGGGTAGTA
TM6SF2	0.601813	0.999908	-0.707137	-0.938498	2987	1	TTCCTTCGCCATGAGCATCC
NFKB1	0.601813	0.999908	-0.706995	-0.938309	2987	1	TTACCCGACCACCATGTCCT
GEMIN5	0.602014	0.999908	-0.706852	-0.93812	2988	1	TGTGCCACCAGCTCCGACGA
TGM1	0.602014	0.999908	-0.70671	-0.937932	2988	1	TGTCGTACTTCATGTAGACC
TTC26	0.602216	0.999908	-0.706426	-0.937554	2989	1	TGTACGCCTCTGCCTACAGC
FAM83B	0.602618	0.999908	-0.706284	-0.937366	2991	1	TGGTTGTCTAACTCGATTCC
CDC23	0.60282	0.999908	-0.705999	-0.936988	2992	1	TGGTGTGGTGCTTCGAAAAC
TRIM10	0.603424	0.999908	-0.705857	-0.9368	2995	1	TGGCCGCAGTCGATAGTGAC
CHRNA3	0.603827	0.999908	-0.705715	-0.936611	2997	1	TGGCCCGCTCTCGCTGCCCC
BBS5	0.60423	0.999908	-0.705573	-0.936422	2999	1	TGGAAACTCACTGCGCGGAC
UFSP2	0.593383	0.999908	-0.59422	-0.936339	2725	2	TTTCAGCTAGCTACTCCTAA
hsa-mir-103a-1	0.604632	0.999908	-0.705431	-0.936234	3001	1	TGCTTGATCCATATGCAACA
SUMO4	0.604834	0.999908	-0.705289	-0.936045	3002	1	TGCTTCACTGACAATCCCCG
hsa-mir-3972	0.593383	0.999908	-0.594029	-0.936037	2725	2	GGCTTGGGGTGGCAGTCCTG
PI4KA	0.605035	0.999908	-0.705146	-0.935856	3003	1	TGCTGTCTGATGTGGCCTAT
MAF1	0.605035	0.999908	-0.705004	-0.935668	3003	1	TGCCTCACCTGCCAATGATG
CHMP4A	0.594036	0.999908	-0.593772	-0.935633	2728	2	TGCAGAAGTCCTTCGTACCA,CGCCCACATTTAACAACTCC
PSPN	0.605438	0.999908	-0.704862	-0.935479	3005	1	TGCCCGTCACAATGGCCGTA
MAGED2	0.605639	0.999908	-0.70472	-0.93529	3006	1	TGCAGGTCTAACTCGCTTCC
RHOC	0.605841	0.999908	-0.704578	-0.935101	3007	1	TGATCCGGTTCGCCATGTCC
VIMP	0.595342	0.999908	-0.593346	-0.934961	2734	2	TCTTTCAGAAGCTTTCCGCC,ACGACTCACCCGTGGTGTGC
CLPTM1L	0.606042	0.999908	-0.704436	-0.934913	3008	1	TGAGCGTGTACACCACGACG
KLHL33	0.606848	0.999908	-0.703867	-0.934158	3012	1	TCTGCGGACGATCTCCACCC
hsa-mir-6762	0.607251	0.999908	-0.703725	-0.933969	3014	1	TCTGCGAAGAGCCGGGGCCA
RAD21	0.608056	0.999908	-0.703583	-0.933781	3018	1	TCTGATTCAAGCTGAACTGC
hsa-mir-1470	0.608258	0.999908	-0.70344	-0.933592	3019	1	TCTCCTGCCCCGGGGTGCAC
TXLNA	0.609869	0.999908	-0.703014	-0.933026	3027	1	TCGGAGACCGAGACCATCGA
SFXN5	0.609869	0.999908	-0.702872	-0.932837	3027	1	TCGCACACTCTTTGTCACTG
CLEC3A	0.610272	0.999908	-0.70273	-0.932649	3029	1	TCGACGTTTGCTGTGCTTCC
ABCC2	0.610675	0.999908	-0.702587	-0.93246	3031	1	TCCTTACCTGTAAGAGTGTC
FLJ44313	0.611078	0.999908	-0.702445	-0.932271	3033	1	TCCTCGTGATAACTCCGCAG
BCAT1	0.611883	0.999908	-0.702161	-0.931894	3037	1	TCCGCAGAGTGTACCGGAGA
hsa-mir-24-2	0.599478	0.999908	-0.591182	-0.931552	2753	2	CAACTGTGTTTCAGCTCAGT
LRRC1	0.613494	0.999908	-0.70145	-0.930951	3045	1	TCAGCGGAAACCCACTGACT
IFITM1	0.613494	0.999908	-0.701308	-0.930762	3045	1	TCAACACCCTCTTCTTGAAC
XDH	0.614099	0.999908	-0.701166	-0.930573	3048	1	TCAAATCGCAGCTGCTTCCG
ZMAT1	0.614502	0.999908	-0.701024	-0.930384	3050	1	TATTGCTCAGTCTCACTATG
PXDC1	0.615106	0.999908	-0.700881	-0.930196	3053	1	TATGTCGTGGGCTTCCTTTA
C11orf30	0.61571	0.999908	-0.700739	-0.930007	3056	1	TATCAGTGCACTTCGGGCAC
MNF1	0.616113	0.999908	-0.700597	-0.929818	3058	1	TACAAGCTGATCCTGTCCAC
UQCC2	0.616113	0.999908	-0.700597	-0.929818	3058	1	TACAAGCTGATCCTGTCCAC
PTPMT1	0.616516	0.999908	-0.700455	-0.92963	3060	1	GTTGCGGAGCTTGACGCGCC
EPM2A	0.616918	0.999908	-0.700028	-0.929064	3062	1	GTGTACGTGCACTGCAACGC
UBN2	0.61712	0.999908	-0.699886	-0.928875	3063	1	GTGGGAAACCCCGTAAACAC
METTL24	0.61712	0.999908	-0.699744	-0.928686	3063	1	GTCGTCAAGACACACTGACC
hsa-mir-6803	0.602525	0.999908	-0.58932	-0.928618	2767	2	CCTCGCCTTCTCACCCTCAG
KRT81	0.617724	0.999908	-0.699602	-0.928498	3066	1	GTCATACTGTGCCTTAATCT
FAM151B	0.617724	0.999908	-0.69946	-0.928309	3066	1	GTATCATGCAGCTAACCACA
DIO3	0.602743	0.999908	-0.589113	-0.928292	2768	2	GGTTCCCTTGCGCGTAGTCG
hsa-mir-548ab	0.61853	0.999908	-0.699318	-0.92812	3070	1	GGTTGGTGCAAAACTAATTG
hsa-mir-3689f	0.61853	0.999908	-0.699175	-0.927932	3070	1	GGTGTGATATCGTGCTTCCT
C8orf42	0.618933	0.999908	-0.699033	-0.927743	3072	1	GGTGTACTTGGTCGAGCCCT
TDRP	0.618933	0.999908	-0.699033	-0.927743	3072	1	GGTGTACTTGGTCGAGCCCT
SMOC1	0.619537	0.999908	-0.698891	-0.927554	3075	1	GGTCTCGGCACTTGGCTCGC
HEPACAM	0.619738	0.999908	-0.698749	-0.927366	3076	1	GGTCTCGATAGTCAGGCCGC
C1orf204	0.61994	0.999908	-0.698607	-0.927177	3077	1	GGTAGCTGAGGGGCAGTTTA
NonTargetingControlGuideForHuman_0603	0.620342	0.999908	-0.698465	-0.926988	3079	1	GGCTGGTTGACCTTCCCGCT
SPDYE2	0.528315	0.999908	-0.460793	-0.926831	2294	4	TAGATCCCAGCCCCCCATGT,CCTACCAAGCAGCCTGTTGA
SPDYE2B	0.528315	0.999908	-0.460793	-0.926831	2294	4	TAGATCCCAGCCCCCCATGT,CCTACCAAGCAGCCTGTTGA
SPDYE2L	0.528315	0.999908	-0.460793	-0.926831	2294	4	TAGATCCCAGCCCCCCATGT,CCTACCAAGCAGCCTGTTGA
SPDYE6	0.528315	0.999908	-0.460793	-0.926831	2294	4	TAGATCCCAGCCCCCCATGT,CCTACCAAGCAGCCTGTTGA
TMEM30A	0.620342	0.999908	-0.698322	-0.9268	3079	1	GGCAACGTGTTTATGTATTA
SAA2-SAA4	0.620745	0.999908	-0.69818	-0.926611	3081	1	GGATATCATTATGTCCCAAT
SAA4	0.620745	0.999908	-0.69818	-0.926611	3081	1	GGATATCATTATGTCCCAAT
C7orf65	0.620947	0.999908	-0.698038	-0.926422	3082	1	GGACCTGCCCAGAATTCATG
PXT1	0.620947	0.999908	-0.697896	-0.926233	3082	1	GGACAACATTGATCATAGGA
INTS2	0.537887	0.999908	-0.511462	-0.926117	2377	3	AGCACAAGACGCAATCGACG
CCDC88A	0.621954	0.999908	-0.697754	-0.926045	3087	1	GGAAGTGACTGATATGTCGC
SP8	0.622356	0.999908	-0.697185	-0.92529	3089	1	GCCGCCGCAGCTGAACGAGT
EPHA5	0.623162	0.999908	-0.696901	-0.924913	3093	1	GCCAAGTGTCGTACCACAGA
PBX4	0.623565	0.999908	-0.696759	-0.924724	3095	1	GCATTGAGCACTCTGACTAC
RXFP2	0.624572	0.999908	-0.696616	-0.924535	3100	1	GCACTTGGTAAGATTCCCAC
hsa-mir-551a	0.625982	0.999908	-0.696332	-0.924158	3107	1	GCAACCCTGGAAACCAAGAG
hsa-mir-8061	0.625982	0.999908	-0.69619	-0.923969	3107	1	GATTAGAGGATATTGTTCAG
PTPN23	0.626788	0.999908	-0.696048	-0.923781	3111	1	GATCTACTACTTCGCAGCCG
NDUFAF2	0.626989	0.999908	-0.695906	-0.923592	3112	1	GATATTCCAACAGAATGGGA
IGSF10	0.627392	0.999908	-0.695621	-0.923215	3114	1	GAGCTTGACACGATTGCACA
AMER1	0.627593	0.999908	-0.695479	-0.923026	3115	1	GAGCAGCCTCCCTCGATACT
NonTargetingControlGuideForHuman_0598	0.628197	0.999908	-0.695337	-0.922837	3118	1	GAGACCACTTTCGTGCAAGC
OR4D5	0.628197	0.999908	-0.695195	-0.922649	3118	1	GACTGTCTGTGCACTCCTTA
MBD3L4	0.609708	0.999908	-0.585383	-0.922414	2800	2	CCCGTACTCACCAGAACAGG,TGTCAGCATTTCTGCCTGCC
MBD3L5	0.609708	0.999908	-0.585383	-0.922414	2800	2	CCCGTACTCACCAGAACAGG,TGTCAGCATTTCTGCCTGCC
SH3RF2	0.629406	0.999908	-0.69491	-0.922271	3124	1	GACCAACCCCAGACGTCTGC
LOC100507462	0.629607	0.999908	-0.694768	-0.922083	3125	1	GACACACCCAACACGCCCGC
IL15	0.63001	0.999908	-0.694626	-0.921894	3127	1	GAATTACCTGCACAAATCTA
RANBP17	0.63001	0.999908	-0.694484	-0.921705	3127	1	GAAGATGGCGCTGCACTTCC
C1orf189	0.630614	0.999908	-0.694342	-0.921516	3130	1	GAAACCCGTATGCCACCCTA
GNAT1	0.630816	0.999908	-0.6942	-0.921328	3131	1	CTTTCAGGTGCCGGTGAGTC
PWWP2A	0.630816	0.999908	-0.694057	-0.921139	3131	1	CTTGTCGTGTCGTTCCGCTT
CLGN	0.63142	0.999908	-0.693915	-0.92095	3134	1	CTGCCGTCAAACCAGAAGAC
ADAMTS12	0.632427	0.999908	-0.693347	-0.920196	3139	1	CTCGGACTGGACCCACCACG
PCYOX1	0.633031	0.999908	-0.693062	-0.919818	3142	1	CTCATAGCGATTATTGGAGC
RASGRP2	0.633031	0.999908	-0.69292	-0.91963	3142	1	CTCACCGAGGACTTGGAGCG
SMAD1	0.633837	0.999908	-0.692778	-0.919441	3146	1	CTATGAGCTCAACAATCGTG
DDX21	0.634038	0.999908	-0.692636	-0.919252	3147	1	CTAGTTTGCCATTCTGTATG
NDEL1	0.63424	0.999908	-0.692494	-0.919064	3148	1	CTAGCTCATCCCGAGCTTCC
MR1	0.634441	0.999908	-0.692351	-0.918875	3149	1	CGGTGTCCACATGGTTCTTC
RBBP8NL	0.636254	0.999908	-0.691783	-0.91812	3158	1	CGACTCCATGAAGCTCTCCA
KMO	0.636455	0.999908	-0.691498	-0.917743	3159	1	CGACAAGCCTTGAAAGCTGT
SPDYE4	0.636858	0.999908	-0.691356	-0.917554	3161	1	CGAATGGTCAGACGAATCCG
hsa-mir-4533	0.637261	0.999908	-0.691214	-0.917365	3163	1	CGAAACTCGTCATGAGAATG
POC1B	0.637261	0.999908	-0.691072	-0.917177	3163	1	CCTTGTATCGACATACACAC
JARID2	0.637261	0.999908	-0.69093	-0.916988	3163	1	CCTTAGACTGGTCATTACCA
NCAPH	0.637261	0.999908	-0.690788	-0.916799	3163	1	CCTCTCGAGTTGCCAGAGTT
hsa-mir-4709	0.637865	0.999908	-0.690503	-0.916422	3166	1	CCTCCTCTTCAACGAATCAC
IRGM	0.637865	0.999908	-0.690361	-0.916233	3166	1	CCTCATGTCCTGTGTTTCGA
APOC4	0.638268	0.999908	-0.690077	-0.915856	3168	1	CCTACTATGACGACCACCTG
hsa-mir-6749	0.638268	0.999908	-0.689935	-0.915667	3168	1	CCGAGAGCTGGGCCAGGCAG
MRPS25	0.638469	0.999908	-0.689792	-0.915479	3169	1	CCCTTCCTGCGATTCTACTT
[truncated: 4,587 more rows]

## Sheet: Figure 1E-H
Figure 1E		Figure 1F		Figure 1G		Figure 1H
shCtrl	shIL20RA	shCtrl	shIL20RA	Vec	IL20RA	Diaphragm		Peritoneum		Mesentery
0.2	1	1	1	8	0.5	Vec	IL20RA	Vec	IL20RA	Vec	IL20RA
0.15	0.6	1	3	3	0	33	8	15	4	20	13
0.1	0.7	1	8	6	2	20	6	10	6	19	12
1.2	1.2	2	8	7	3	40	22	22	10	37	6
0.5	0.6	3	9	3	1.5	55	19	21	12	19	20
0.3	0.8	2	14	6	0.5	32	17	21	9	51	17
0.45	1.5	2	15			26	8	34	9	42	8

## Sheet: Figure1-figure supplement 1
Figure1-figure supplement 1B
shCtrl	shIL20RA
0.97716	0.230579
1.04006	0.252321
0.983957	0.278034
Figure1-figure supplement 1C
Vec	IL20RA
9	1.5
10.5	5.5
8	4.5
5.5	6
5	5
9	0.5
Figure1-figure supplement 1D
Diaphragm		Peritoneum		Mesentery
Vec	IL20RA	Vec	IL20RA	Vec	IL20RA
20	13	33	10	25	8
19	12	31	18	20	10
26	6	23	15	18	2
38	20	28	8	24	8
15	10	15	20	20	15
22	8	22	7	26	7
