# Supplementary material for: A systematic CRISPR screen reveals an IL-20/IL20RA-mediated immune crosstalk to prevent the ovarian cancer metastasis
Source: eLife. 2021 Jun 11;10:e66222. doi: 10.7554/eLife.66222 (PMC8195602; doi:10.7554/eLife.66222)
Supplement: Figure 2—source data 1. [file elife-66222-fig2-data1.xlsx]

## Sheet: Figure 2
Figure 2B				Figure 2C-D					Figure 2E
pri	met	pri	asc	P1	pri	1.08423	0.874583	1.05458	Pri	Met
1.90087	0.490672	2.14564	0.27088		asc	0.031833	0.0299078	0.037077	12	0
2.8095	0.180394	1.19276	0.261812	P2	pri	0.959264	0.972655	1.07177	12	4
1.84348	0.282707	0.71329	0.150586		asc	0.158586	0.178418	0.158586	12	1
2.18684	1.95315	1.90087	0.639042	P3	pri	1.03049	1.1434	0.848704	8	8
1.90087	0.490672	2.18684	0.253884		asc	0.00372124	0.00433426	0.0044871	12	4
2.50073	0.959233	1.45736	0.120691	P4	pri	0.918064	1.01866	1.0693	8	4
1.98914	1.81398				met	0.152125	0.160799	0.13061	12	4
0.642783	0.36597				asc	0.00113744	0.00159746	0.00254168	12	8
1.45736	0.779616			P5	pri	0.95705	0.997692	1.04729	8	3
1.02511	0.417561				met	0.302149	0.281915	0.310644	8	3
1.13533	0.913884			P6	pri	1.04488	0.878633	1.08925	3	0
1.56245	1.44387				met	0.0243489	0.0197774	0.0216423	2	0
1.16945	0.697535			P7	pri	0.928731	1.02337	1.05214	3	0
1.88448	1.06821				met	0.118805	0.13742	0.206851	4	3
1.77175	0.349754				asc	0.0229823	0.035814	0.0294961	8	2
1.46016	1.37697			P8	pri	0.988514	1.11987	0.903335	3	0
1.19546	0.938259				met	0.0208087	0.0154455	0.0198232	3	0
1.2455	0.667251			P9	pri	0.802923	1.24258	1.00231	8	4
1.56245	0.662252				met	0.363493	0.348686	0.309927	12	0
				P10	pri	1.02811	1.04972	0.926588	6	2
					met	0.797377	0.831238	0.854607
				P11	pri	0.941696	1.0163	1.04488
					asc	0.014714	0.0128984	0.0148163
					met	0.198884	0.205898	0.198884
				P12	pri	1.19472	0.880666	0.950439
					met	0.422396	0.413703	0.443396
				P13	pri	1.04729	0.82169	1.16205
					met	0.601513	0.597358	0.338368
				P14	pri	1.11214	1.03766	0.866537
					met	0.346277	0.316439	0.332171
					met	0.590496	0.466516	0.558644
				P15	pri	1.00231	1.15136	0.866537
					met	0.144586	0.15932	0.164938
				P16	pri	1.11214	0.825496	1.08925
					met	0.786399	0.866537	0.909618
				P17	pri	0.941696	0.941696	1.12766
					met	0.142595	0.105112	0.164938
				P18	pri	0.941696	1.03049	1.03049
					met	0.556068	0.494257	0.548412
				P19	pri	1.05214	0.909618	1.04488
					met	0.533416	0.571701	0.436282
				P20	pri	1.23399	0.872564	0.928731
					met	0.215138	0.230579	0.21071

## Sheet: Figure 2-figure supplement 2
Figure 2-figure supplement 2A-B
	Pri			Met
P1	1.29235	0.406126	1.90528	0.00621513	0.00515433	0.00451831
P2	0.97041	0.856584	1.20303	1.43065	2.1386	2.05148
P3	1.11471	0.89917	0.997692	0.127627	0.176777	0.216134
P4	0.907519	0.907519	1.21419	1.41095	1.4406	1.65481
P5	0.876606	1.1019	1.03527	0.503478	0.673617	0.539614
P6	0.718636	0.928731	1.49831	0.664343	1.07177	0.965936
P7	1.04006	0.419478	2.2921	0.831238	1.58374	1.06683
P8	1.32562	0.833161	0.905425	6.83686	6.74273	8.24394
P9	0.897095	0.968171	1.15136	1.09682	0.442372	0.897095
P10	0.965936	0.965936	1.07177	1.50351	2.20127	1.91631
