# Supplementary material for: A systematic CRISPR screen reveals an IL-20/IL20RA-mediated immune crosstalk to prevent the ovarian cancer metastasis
Source: eLife. 2021 Jun 11;10:e66222. doi: 10.7554/eLife.66222 (PMC8195602; doi:10.7554/eLife.66222)
Supplement: Figure 3—source data 1. [file elife-66222-fig3-data1.xlsx]

## Sheet: Figure 3
Figure 3B
Macrophages		M1-like		M2-like
Vec	IL20RA	Vec	IL20RA	Vec	IL20RA
21.3	22.9	19.9	36.6	25.7	1.12
19.6	23	23.5	29.3	7.75	2.47
37.9	11.1	18.9	23.4	4.92	2.82
19.4	26.2	15.7	25.1	21	3.5
18.6	33.5	22.7	26.4	4.73	1.39
Figure 3C
M1 markers
	Vec			IL20RA
iNOS	0.90125	1.13288	0.97942	105.42	134.364	158.683
IFNAR	1.14605	0.990801	0.880666	32.3718	26.2941	24.7039
CCR2	1.14605	1.01162	0.862542	18.2101	26.2941	18.4643
TNFαR	1.01631	1.00928	0.974905	18.4217	14.6551	15.0671
M2 markers
Arg1	1.06437	0.959264	0.97942	0.0409498	0.0188407	0.0395549
IL10	1.05458	1.03288	0.918064	0.0746697	0.17515	0.11162
CD163	0.866537	1.43727	0.802923	0.487452	0.3423	0.339936
Figure 3D						Figure 3E
CD3+T cells		CD4+T cells		CD8+T cells		B cells
Vec	IL20RA	Vec	IL20RA	Vec	IL20RA	Vec	IL20RA
25.6	43	31.9	31.3	40	37.3	43.8	24.6
22.1	22.8	30.2	39.9	42.6	44.5	50.7	46.8
29.4	26.3	35.4	48	47.7	30	51.7	55
28.2	30	38.3	29.4	44.2	32.2	42.5	39.8
29.1	36.4	36.1	38.4	44.8	43.7	43.9	39.7
Figure 3F
Macrophages		M1-like		M2-like
shCtrl	shIL20RA	shCtrl	shIL20RA	shCtrl	shIL20RA
70	74.2	35.5	6.65	1.91	11.5
70.4	56.4	30.6	16.7	4.46	8.25
76.4	76.4	25	21.6	0.636	12.1

## Sheet: Figure 3-figure supplement 1
Figure 3-figure supplement 1D
SK-OV-3shCtrl	SK-OV-3shIL20RA
305	356
278	310
337	275
