# Supplementary material for: A systematic CRISPR screen reveals an IL-20/IL20RA-mediated immune crosstalk to prevent the ovarian cancer metastasis
Source: eLife. 2021 Jun 11;10:e66222. doi: 10.7554/eLife.66222 (PMC8195602; doi:10.7554/eLife.66222)
Supplement: Figure 4—source data 1. [file elife-66222-fig4-data1.xlsx]

## Sheet: Figure 4
Figure 4B
Raw 264.7 M1 markers
	CMvec IL-20(-)			CMIL20RA IL-20(-)			CMvec IL-20(+)			CMIL20RA IL-20(+)
NOS2	1.02574	1.02574	0.950439	1.02574	1.05458	0.963707	1.28343	1.42405	1.42405	4.64818	4.45883	3.80176
IFNAR1	1.04729	0.92445	1.03288	0.810378	0.997692	1.05458	1.03527	0.829319	0.959264	2.59668	2.40605	2.47369
CCR2	0.80478	1.04729	1.18646	1.42076	1.27162	1.06191	0.846745	1.27456	1.08674	2.70695	2.15347	2.27626
TNFα	1.17284	0.946058	0.90125	0.876606	0.817902	0.920188	0.897095	0.652176	0.591862	1.42405	1.31039	0.829319
Ly6G/C	1.29235	1.11729	0.692555	0.870551	0.61132	1.31951	0.968171	0.866537	0.831238	1.93187	1.84038	1.67018
Raw 264.7 M2 markers
	CMvec IL-20(-)			CMIL20RA IL-20(-)			CMvec IL-20(+)			CMIL20RA IL-20(+)
Arg1	1.07177	0.993093	0.939523	0.68302	1.05702	0.779165	1.15936	1.07425	0.808508	0.469761	0.619854	0.532185
IL10	0.7457	1.09177	1.2283	0.66742	1.17827	0.856584	0.829319	0.907519	1.23971	0.44648	0.410845	0.597358
CD163	0.835088	0.972655	1.23114	1.20581	0.952638	1.18921	1.217	1.05215	1.16743	0.582367	0.503478	0.535887
CX3CR1	0.864537	0.952638	1.21419	1.07923	1.32869	0.946058	0.890899	0.99539	0.831238	0.397768	0.435275	0.473029
Figure 4D
Cd68
Ctrl	M-CSF
1.00231	35.1796
0.968171	27.9866
1.03049	39.0342
Figure 4E
BMDM M1 markers
	CMvec IL-20(-)			CMIL20RA IL-20(-)			CMvec IL-20(+)			CMIL20RA IL-20(+)
NOS2	0.986233	1.31039	0.773783	1.25122	1.10445	0.733736	0.972655	0.80107	0.655197	37.7045	26.6611	28.3773
IFNAR1	1.04488	1.07425	0.890899	1.07674	0.788218	1.20303	1.12766	0.814131	0.718636	120.259	121.095	128
TNFα	0.860551	1.04488	1.11214	1.23685	1.43065	0.905425	1.09682	1.08173	1.39797	43.1115	46.8507	44.9422
BMDM M2 markers
	CMvec IL-20(-)			CMIL20RA IL-20(-)			CMvec IL-20(+)			CMIL20RA IL-20(+)
Arg1	0.759611	1.10445	1.19196	0.89296	1.10701	1.17013	0.884745	0.780967	0.73884	0.20733	0.285191	0.309927
IL10	0.876606	0.933033	1.22264	1.217	0.941696	1.31343	1.02811	1.1487	0.972655	0.221698	0.145256	0.187722
CD163	1.1019	1.24833	0.726986	1.11214	0.797377	1.05946	1.04247	0.876606	0.835088	0.481853	0.355191	0.523647
Figure 4G
CD68
Ctrl	PMA
0.946058	6.51305
0.907519	7.90811
1.16473	6.78963
Figure 4H
THP-1 M1 markers
	CMshCtrl IL-20(-)			CMshIL20RA IL-20(-)			CMshCtrl IL-20(+)			CMshIL20RA IL-20(+)
NOS2	1.24545	0.886791	0.905425	1.05946	0.825496	0.884745	1.86176	2.1386	1.95432	1.22547	1.40769	1.06683
IL1β	0.874583	1.11471	1.02574	1.04488	0.831238	0.66128	2.45661	2.80241	2.22942	0.909618	0.764895	0.866537
TNFα	0.946058	0.907519	1.16473	0.97041	1.13813	1.09936	1.85318	2.25012	1.93187	0.911722	0.874583	0.827406
THP-1 M2 markers
	CMshCtrl IL-20(-)			CMshIL20RA IL-20(-)			CMshCtrl IL-20(+)			CMshIL20RA IL-20(+)
ARG1	1.04247	0.993093	0.965936	1.06191	1.04729	0.799221	0.558644	0.460094	0.532185	1.06191	1.27162	1.28046
IL10	1.00463	0.963707	1.03288	1.1355	1.11214	0.922316	0.455861	0.40239	0.345478	1.17555	1.27751	0.842842
CD163	0.915945	0.935191	1.16743	0.993093	0.993093	0.852635	0.436282	0.385107	0.501157	0.939523	0.933033	0.986233
CD206	0.895025	0.965936	1.15669	0.886791	0.983957	0.990801	0.073812	0.0583146	0.0683934	0.937354	0.89917	1.04006

## Sheet: Figure 4-figure supplement 1
Figure 4-figure supplement 1C
ID8Vec	ID8IL20RA
128	79
76	93
84	125
Figure 4-figure supplement 1D
Raw 264.7 M1 markers
	CMvec			CMIL20RA
NOS2	0.868541	1.01866	1.13027	5.59188	5.78908	6.37901
IFNAR1	1.00231	0.878633	1.1355	2.54912	2.60268	2.63902
CCR2	0.963707	1.04006	0.997692	1.50873	1.42734	1.54043
TNFα	1.11471	0.89917	0.997692	1.06437	1.20581	1.04247
Ly6G/C	1.23114	0.90125	0.90125	1.42076	1.74917	1.71317
Raw 264.7 M2 markers
	CMvec			CMIL20RA
Arg1	0.92445	1.01162	1.0693	0.586418	0.61132	0.687771
IL10	0.97041	1.17013	0.880666	0.496546	0.444421	0.312083
CD163	0.965936	1	1.03527	0.915945	1.00928	1.04488
CX3CR1	0.89296	1.04729	1.0693	0.382447	0.257623	0.326088
Figure 4-figure supplement 1E
THP-1 M1 markers
	CMshCtrl			CMshIL20RA
NOS2	1.00696	1.04247	0.952638	0.732043	0.678302	0.757858
IL1β	0.946058	0.97942	1.07923	0.157127	0.174343	0.141611
TNFα	1.12506	0.959264	0.926588	0.80107	0.829319	0.779165
THP-1 M2 markers
	CMshCtrl			CMshIL20RA
ARG1	1.01162	1.04006	0.950439	2.38943	2.21402	2.05148
IL10	1.01162	0.911722	1.08423	2.18354	1.96791	2.40605
CD163	1.09177	1.07674	0.850667	3.21912	2.9828	3.1748
CD206	0.782773	1.06191	1.20303	1.41095	1.36289	1.4811
Figure 4-figure supplement 1F
Raw 264.7 M1 markers
	Ctrl			IL-20
NOS2	1.14076	0.870551	1.00696	0.810378	0.82169	0.766664
IFNAR1	1.18372	0.941696	0.897095	1.05215	0.948246	1.02337
CCR2	0.909618	1.19196	0.922316	1.45734	1.48796	1.37872
TNFα	0.918064	0.983957	1.10701	1.31646	1.12246	1.32562
Ly6G/C	0.963707	1.15402	0.89917	1.00463	0.97716	0.97716
Raw 264.7 M2 markers
	Ctrl			IL-20
Arg1	0.99539	1.17555	0.854607	1.18921	1.02811	0.926588
IL10	1.00928	1.08173	0.915945	1.05946	0.854607	1.26869
CD163	1.13288	1.20581	0.732043	1.31039	1.28343	1.14076
CX3CR1	1.25122	0.878633	0.909618	1.1434	1.15136	0.909618
Figure 4-figure supplement 1G
Raw 264.7 M1 markers
	Ctrl			IL-24
NOS2	0.952164	1.04628	1.00378	0.979298	1.10885	1.26218
IFNAR1	1.03699	1.01638	0.94879	1.11596	1.15942	0.93567
CCR2	1.03043	1.00391	0.966689	0.964349	1.10258	1.27012
TNFα	1.02696	1.00472	0.969174	1.45234	1.44971	1.58554
Ly6G/C	0.802302	1.19981	1.03884	1.35778	1.05732	1.05552
Raw 264.7 M2 markers
	Ctrl			IL-24
Arg1	1.00366	1.03713	0.960678	0.961721	0.851726	1.04261
IL10	0.954694	1.10304	0.949608	0.906918	0.949326	1.05715
CD163	0.879744	1.07393	1.05844	1.01987	0.903574	1.50549
CX3CR1	0.741176	1.09422	1.23303	1.70471	1.41104	1.24776
