# Supplementary material for: A systematic CRISPR screen reveals an IL-20/IL20RA-mediated immune crosstalk to prevent the ovarian cancer metastasis
Source: eLife. 2021 Jun 11;10:e66222. doi: 10.7554/eLife.66222 (PMC8195602; doi:10.7554/eLife.66222)
Supplement: Figure 5—source data 1. [file elife-66222-fig5-data1.xlsx]

## Sheet: Figure 5
Figure 5C
ID8	ID8/BMDMVec	ID8/BMDMIL20RA
6	9	0.5
0.5	4.5	0.3
1.5	4	0.5
5	5	2
3	3	1
5.5	2	3
Figure 5E
Diaphragm			Peritoneum			Mesentery
ID8	ID8/BMDMVec	ID8/BMDMIL20RA	ID8	ID8/BMDMVec	ID8/BMDMIL20RA	ID8	ID8/BMDMVec	ID8/BMDMIL20RA
38	40	14	54	59	5	22	65	26
16	43	5	15	49	1	39	45	5
15	54	4	40	60	10	28	62	22
20	46	8	19	47	4	30	39	8
42	47	3	25	50	22	19	45	5
2	27	9	39	43	8	42	42	29
Figure 5H
ID8Vec/PBS	ID8IL20RA/PBS	ID8Vec/CLO	ID8IL20RA/CLO
2.5	0.5	4.5	8
5	1	5	7.5
6	1	7	3.5
7.5	2.5
10	3
7	3.5
Figure 5J
Diaphragm				Peritoneum				Mesentery
ID8Vec/PBS	ID8IL20RA/PBS	ID8Vec/CLO	ID8IL20RA/CLO	ID8Vec/PBS	ID8IL20RA/PBS	ID8Vec/CLO	ID8IL20RA/CLO	ID8Vec/PBS	ID8IL20RA/PBS	ID8Vec/CLO	ID8IL20RA/CLO
35	8	22	21	13	2	10	9	34	15	19	29
26	10	36	18	20	3	7	7	28	6	23	15
42	12	26	29	15	8	18	12	21	12	27	12
43	7			12	4			25	8
28	15			8	9			21	11
55	11			21	9			34	9
