# Supplementary material for: A systematic CRISPR screen reveals an IL-20/IL20RA-mediated immune crosstalk to prevent the ovarian cancer metastasis
Source: eLife. 2021 Jun 11;10:e66222. doi: 10.7554/eLife.66222 (PMC8195602; doi:10.7554/eLife.66222)
Supplement: Figure 6—source data 1. [file elife-66222-fig6-data1.xlsx]

## Sheet: Figure 6
Figure 6A
Il19
	Ctrl			OC
Intestine	0.82169	1.20303	1.01162	0.552227	0.515246	0.501157
Ovary	1.27751	1.01631	0.770215	0.616996	0.515246	0.490843
Abd Wall	1.11214	0.968171	0.928731	1.35035	1.02337	0.935191
Il20
	Ctrl			OC
Intestine	0.986233	1.05702	0.959264	0.523647	0.553504	0.565135
Ovary	0.93088	0.983957	1.09177	1.07674	1.12246	1.05458
Abd Wall	1.09936	0.850667	1.0693	8.263	7.98154	6.80534
Il24
	Ctrl			OC
Intestine	0.986233	1.05702	0.959264	0.523647	0.553504	0.565135
Ovary	0.93088	0.983957	1.09177	0.761369	0.740549	1.05458
Abd Wall	1.15136	0.831238	1.04488	8.07428	7.79924	6.6499
Figure 6B
Macrophages
	Ctrl			OC
Il19	0.954842	0.842842	1.24257	1.18099	1.06437	1.20581
Il20	0.817902	0.965936	1.26576	1.11471	0.715323	1.0693
Il24	1.28046	0.756109	1.03288	0.903335	1.15136	1.48796
ID8 cells
Figure 6C
	Vec			IL20RA
Il19	1.03288	0.963707	1.00463	0.876606	0.790041	0.913832
Il20	1.02574	0.631418	1.54399	0.806642	0.76313	1.17284
Il24	0.840896	1.14076	1.04247	1.22547	1.41749	1.24257
Figure 6D
	IL-20		IL-24
	Ctrl	OC	Ctrl	OC
	13.8534	33.8636	7.15016	44.2563
	15.907	25.8667	2.17009	42.6134
	16.0231	45.5485	9.31513	53.8309
	11.8295	40.1032	2.37239	47.6409
	11.8256	36.6135	3.70815	33.631
	24.3461	31.766	10.2355	26.8312
Figure 6E
Peritoneum
	Ctrl			"+ID8"
Il19	1.14605	0.874583	0.997692	1.15136	1.28639	1.32256
Il20	1.03288	0.844791	1.14605	13.2998	18.8088	16.9514
Il24	1.20025	0.802923	1.03766	26.1729	29.0406	31.5594
