# Supplementary material for: A systematic CRISPR screen reveals an IL-20/IL20RA-mediated immune crosstalk to prevent the ovarian cancer metastasis
Source: eLife. 2021 Jun 11;10:e66222. doi: 10.7554/eLife.66222 (PMC8195602; doi:10.7554/eLife.66222)
Supplement: Figure 7—source data 1. [file elife-66222-fig7-data1.xlsx]

## Sheet: Figure 7
Figure 7A
	Vec			IL20RA
OAS1a	0.961483	0.872564	1.19196	8.39773	8.1681	8.22491
Il18	0.961483	1.33176	0.780967	2.44528	2.71321	2.21914
Figure 7B
IL-18
Vec	6.971	13.0088	9.3084
IL20RA	19.9751	28.1129	22.8997
Figure 7E
IL-18
Ctrl	1.8104	2.6989	2.9967
IL-20	5.88757	8.2527	9.51037
Figure 7G
	Oas1a promotor									Il18 promotor
	#1			#2			#3			#1			#2			#3
Ctrl, IP: IgG	0.0139335	0.0166886	0.0157971	0.0139335	0.0166886	0.0157971	0.000320389	0.000192525	0.000211212	0.0506962	0.052212	0.0555924	0.0157068	0.0131386	0.0174909	0.00718013	0.00724821	0.00632943
Ctrl, IP:α-STAT3	0.237904	0.216893	0.217878	0.0203305	0.0308149	0.0216394	0.000744359	0.000259319	0.000471872	0.0827453	0.0719798	0.0735587	0.0714311	0.0663524	0.0551736	0.00466376	0.00806916	0.00613296
IL-20, IP:α-STAT3	0.439013	0.421076	0.410011	0.0233558	0.0155301	0.0141158	0.000432892	0.000589015	0.00042673	0.199996	0.256064	0.36509	0.486479	0.466147	0.514444	0.00795587	0.00864284	0.00860648
Figure 7I
IL20RA		OAS1		P-STAT3		IL-18
Pri	Met	Pri	Met	Pri	Met	Pri	Met
12	1	6	1	2	0	4	1
8	4	9	8	12	4	12	8
9	0	9	2	0	0	12	1
9	4	12	4	0	2	8	4
12	4	12	4	12	4	12	4
12	1	6	4	8	4	12	4
12	1	9	0	6	0	12	1
12	0	12	4	12	0	12	0
9	2	12	1	8	4	12	0
12	1	6	4	12	4	6	3
Figure 7J
M1 markers
	Ctrl			IL-18
NOS2	0.884745	1.04488	1.08173	2.22942	2.50822	2.24492
Ifnar1	1.23399	1.06683	0.759611	11.2876	8.20593	9.75855
Ccr2	0.895025	0.986233	1.13288	2.48515	1.73307	2.14851
Ly6g/c	0.858565	0.946058	1.23114	1.74513	2.43401	2.07532
M2 markers
	Ctrl			IL-18
Arg1	1.00231	1.09682	0.909618	0.614152	0.413703	0.419478
Il10	0.990801	1.16205	0.868541	0.214641	0.339151	0.260616
Cd163	1.17284	0.817902	1.04247	0.461158	0.480741	0.616996
Cx3cr1	0.959264	0.907519	1.1487	0.245421	0.112917	0.147966
Figure 7K
M1 markers
	CMVec+IgG			CMIL20RA+IgG			CMIL20RA+IL-18 nAb
NOS2	0.950439	0.990801	1.06191	3.81055	3.3833	3.24901	2.54324	1.70133	2.59668
Ifnar1	1.17827	0.95705	0.886791	6.58873	5.42642	6.45313	0.53465	0.581023	0.491978
Ccr2	0.907519	1.05702	1.04247	1.66248	1.37872	1.58374	0.514057	0.742262	0.624165
Ly6g/c	1.02337	0.99539	0.981686	1.65481	2.05148	1.87471	1.16743	1.31343	1.38831
M2 markers
	CMVec+IgG			CMIL20RA+IgG			CMIL20RA+IL-18 nAb
Arg1	0.842842	1.3692	0.866537	0.516438	0.569066	0.538369	0.66588	0.703847	0.698985
Il10	0.926588	0.90125	1.19748	0.574349	0.528509	0.48971	1.11471	1.09177	0.816014
Cd163	0.810378	1.02574	1.20303	0.462225	0.545884	0.614152	1.45734	1.69741	1.34102
Cx3cr1	0.97942	1.15669	0.882703	0.368567	0.381565	0.260616	0.735433	0.700602	0.777366

## Sheet: Figure 7-figure supplement 1A-B
Figure 7-figure supplement 1A-B
Gene ID	IL20RA1 FPKM	IL20RA2 FPKM	IL20RA3 FPKM	VEC1 FPKM	VEC2 FPKM	VEC3 FPKM	Other Gene ID
219150	3.84	3.68	2.2	3.92	3.97	4.11	Hmbox1
13666	8.19	7.66	4.25	7.33	8	7.61	Eif2ak3
142688	3.72	3.55	3	3.8	3.5	3.33	Asb13
217207	14.39	14.61	9.5	15.37	14.5	15.02	Dhx8
246293	0.85	0.62	0.44	0.68	0.53	0.64	Klhl8
52028	0.5	0.53	0.43	0.67	0.81	0.68	Bbs1
67525	1.01	0.84	0.54	0.89	0.65	0.6	Trim62
54638	19.14	20.34	21.51	19.11	19.34	18.45	Ccdc22
434215	0	0	0	0.01	0	0	Lrrc32
108888	24.52	27.68	26.59	33.47	26.7	29.68	Atad3a
666723	0	0	0	0.05	0	0	Gm8256
12798	83.5	93.09	99.7	105.33	94.71	101.45	Cnn2
66271	49.38	53.22	80.56	47.55	47.53	48.61	Tmem126a
66454	4.09	4.18	3.04	3.5	4.91	4.67	Nmnat1
16590	0.23	0.32	0.2	0.19	0.03	0.21	Kit
56554	0.46	0.33	0.45	0.14	0.21	0.07	Raet1d
213452	3.83	3.28	1.5	3.43	4.12	3.8	Dstyk
19092	4.78	4.85	3.66	3.37	3.05	3.35	Prkg2
229898	0.07	0.05	0	0.02	0.07	0.02	Gbp5
19720	31.68	34.75	36.66	35.04	32.71	34.67	Trim27
72946	14.5	15.4	10.11	17.44	15.62	15.39	Lrrc47
66212	194.28	181.93	331.93	161.51	178.93	170.76	Sec61b
238276	2.05	1.88	0.94	2.28	2.11	1.91	Akap5
27084	0	0.1	0.05	0	0	0	Xlr5c
73230	19.32	19.95	18.02	16.62	17.62	17.48	Bmper
93670	0	0	0.08	0	0	0	Tac4
57390	0	0.06	0.18	0.12	0	0.06	Psors1c2
22305	0	0	0	0	0	0.02	Vmn2r37
74477	3.06	3.1	2.18	3.47	3.3	3.79	4933427D14Rik
14729	0	0.02	0	0.05	0	0	Gp5
66586	37.62	41.54	44.07	40.13	38.14	43.8	Crls1
16410	18.44	19.09	9.4	20.52	20.68	21.56	Itgav
224530	0.29	0.12	0.07	0.11	0.11	0.23	Acat3
638262	0.08	0.04	0	0	0.08	0	Gm7233
239083	0.03	0	0	0	0	0.03	Ccnb1ip1
14610	0	0.03	0	0	0.03	0	Gja10
100043235	0	0	0	0.04	0	0	Gm4305
100043772	1.05	1.1	0.53	0.72	0.85	0.86	Zfp850
626848	3.11	3.56	4.44	3.3	3.05	3.37	Zfp971
52055	29.05	28.74	16.04	29.83	31.15	30.64	Rab11fip5
18647	4.98	4.7	1.96	4.3	4.35	4.44	Cdk14
20962	0.14	0.09	0.05	0.06	0.06	0	Sycp3
72486	0.49	0.81	0.35	0.41	0.39	0.48	Rnf219
27275	7.59	9.72	11.28	9.93	7.58	9.8	Nufip1
231050	5.86	5.2	4.27	5.12	5.64	5.33	Galnt11
99982	26.69	25.84	20.53	26	27.53	24.51	Kdm1a
626391	0.84	0.95	0.72	0.94	0.78	0.76	Zfp951
235132	2.21	2.29	1.87	2.54	2.08	2.26	Zbtb44
54201	2.91	2.3	1.42	2.37	2.52	2.16	Zfp316
382252	1.63	1.82	0.83	1.34	1.74	1.61	A830080D01Rik
11798	4.39	4.47	2.08	4.62	4.83	4.58	Xiap
20873	9.93	9.9	7.87	9.98	9.45	9.96	Plk4
230753	48.61	48.37	27.37	51.97	49.82	53.73	Thrap3
109254	0.16	0.2	0.09	0.18	0.25	0.18	Adtrp
383619	0.68	0.61	0.3	0.48	0.49	0.6	Aim2
70549	2.21	2.05	1.11	2.19	1.86	1.97	Tln2
216971	9.68	9.05	6.02	10.45	11.01	10.37	Fam222b
66241	39.16	36.1	37.15	33.45	41.37	36.47	Tmem9
105246618	0.12	0	0	0	0	0	Gm41885
72948	0.03	0	0.03	0.02	0	0.01	Tppp
21881	195.12	190.23	150.59	198.02	209.57	197.3	Tkt
257632	0.02	0	0	0	0	0.01	Nod2
381399	0	0	0	0.02	0	0.02	Bpifb4
66230	30.49	33.86	64.56	33.9	34.22	31.17	Mrps28
11651	196.54	198.97	155.58	215.81	201.42	211.62	Akt1
19727	5.71	4.97	5.06	4.89	5.11	4.63	Rfxank
192156	22.54	23.52	21.6	23.66	23.4	23.24	Mvd
432555	0.11	0.16	0.03	0.17	0.06	0.12	Gm5431
74011	0.55	0.44	0.27	0.24	0.56	0.63	Slc25a27
64051	9.53	7.98	4.48	7.14	9.82	8.24	Sv2a
327987	3.58	3.96	1.51	3.8	3.52	3.82	Med13
239691	0	0	0.05	0.11	0.11	0	AU021092
19165	6.34	5.03	3.86	4.72	5.24	4.05	Psen2
12028	141.82	147.92	280.23	156.51	141.7	145.09	Bax
239420	0	0	0	0	0	0.01	Csmd3
72123	2.48	2.26	2.73	2.22	2.44	2.31	Ccdc71l
216616	86.06	82.98	84.93	97.74	97.98	94.08	Efemp1
384198	0.04	0.05	0	0	0	0	Fam47e
210009	6.89	7.72	4.52	8.72	6.88	8.49	Mtrr
434223	0.01	0	0	0	0.01	0.01	Gm1966
57753	8.89	10.6	8.52	12.19	9	10.99	Noc3l
20983	0.03	0.05	0.03	0.03	0.02	0.03	Syt4
13661	0	0	0	0	0.03	0	Ehf
269682	8.32	8.21	3.44	7.99	7.74	8.46	Golga3
22355	0.02	0	0	0	0	0	Vipr2
20716	0.1	0.17	0.24	0.07	0.05	0.07	Serpina3n
100041194	5.64	4.97	1.71	5.15	6	5.09	Ahnak2
320802	1.02	0.63	1.45	0.83	1.16	1.32	Ifitm10
71131	1.98	1.95	1.72	2.2	1.83	2.24	Zfp689
70503	0.04	0.04	0	0.04	0	0.02	Ddo
214951	4.01	1.92	3.58	1.84	3.36	1.91	Rhbdl1
66129	13.25	11.47	7.39	10.96	12.21	11.26	Aaed1
76293	0	0	0	0	0.03	0	Mfap4
12262	0	0	0	0	0.05	0	C1qc
319185	0.37	0.6	0.94	0.32	0	0.96	Hist1h2bl
22227	0	0	0	0	0.03	0	Ucp1
19252	12.79	14.93	13.51	16.26	11.82	11.29	Dusp1
320022	0.03	0	0	0	0	0	Terb1
68001	19.76	22.49	28.15	22.59	19.25	24.93	1110004E09Rik
208151	0.01	0	0	0	0.01	0.01	Tmem132b
666331	0	0	0	0	0	0.12	LOC666331
74012	4.81	5.19	4.08	4.91	5.52	5.27	Rap2b
272009	0	0	0.02	0	0	0	Srsf12
50875	31.04	30.97	21.51	32.03	31.4	32.04	Tmod3
16716	0.14	0.09	0.07	0.05	0.12	0.05	Ky
66962	4.16	3.22	3.25	4.1	3.98	3.58	Swsap1
58520	54.42	47.81	46.84	51.63	50.55	54	0610007P14Rik
100504491	0.34	0.23	0.62	0.3	0.28	0.44	Dcdc2b
98682	7.73	7.37	3.53	7.74	9.08	8.29	Mfsd6
217138	78.23	62.33	77.6	46.64	63.9	54.79	Prr15l
246228	0.24	0.06	0.09	0.09	0.21	0.2	Vwa1
320997	0	0.04	0	0.02	0	0	Cyp4f39
224860	0	0	0	0.01	0	0	Plcl2
619329	0.04	0.02	0.01	0.04	0.04	0.05	F420015M19Rik
67704	67.93	62.93	141.58	60.57	65.11	59.49	1810037I17Rik
14065	0	0	0	0.03	0	0.03	F2rl3
232174	0.05	0.08	0.02	0.09	0.03	0.09	Cyp26b1
13196	33.84	35.25	13.95	36.78	34.8	35.47	Asap1
70350	130.77	147.5	151.29	172.91	138.63	153.58	Basp1
268752	3.24	3.39	1.49	3.33	3.11	2.91	Wdfy2
213011	0	0	0	0	0.01	0	Zfp583
217666	3.09	2.71	2.75	3.35	3.29	3.52	L2hgdh
434341	0.02	0.05	0.01	0	0.04	0.01	Nlrc5
74129	0.03	0	0.02	0	0.03	0.02	Dmgdh
230597	6.12	7.23	3.63	7.28	6.65	7.81	Zfyve9
330188	0.08	0	0.02	0.06	0.08	0.05	Ccdc63
102657	10.74	9.03	6.27	7.8	9.2	8.14	Cd276
241732	0.17	0.22	0.16	0.07	0.05	0.08	Tspyl3
68612	389.54	387.11	548.14	443.41	445.15	444.44	Ube2c
13589	21.32	23.98	20.81	24.49	22.89	24.61	Mapre1
228026	8.56	7.35	5.59	8.13	8.9	9.05	Pdk1
381974	0	0.03	0	0	0	0.03	Mrgprg
211151	54.64	65.46	129.39	46.74	44.32	40.92	Churc1
114128	32.5	31.99	30.61	29.36	29.48	29.55	Laptm4b
320027	0.05	0.02	0.02	0.03	0.02	0.01	Fstl4
71373	0	0	0	0	0.02	0	Prr16
319262	2.58	2.01	1.44	2.31	2.25	2.04	Fchsd1
66404	31.45	30.71	30.17	32.68	34.63	33.35	Rtfdc1
74018	6.88	7.51	5.04	6.46	6.66	7.1	Als2
56274	21.21	21.25	15.09	20.26	21.2	21.34	Stk3
269966	18.78	20.11	9.84	20.1	18.92	19.71	Nup98
75799	0.05	0	0.05	0	0.06	0	4930444P10Rik
238333	0.17	0.32	0.42	0.05	0.13	0.23	Samd15
23983	347.7	347.44	324.3	344.9	343.42	339.38	Pcbp1
620736	0.24	0	0	0.04	0	0	Gm6176
217154	14.62	11.65	5.66	10.79	13.73	11.49	Stac2
67636	8.49	9.32	9.85	6.6	8.2	7.8	Lyrm5
75219	5.04	4.81	2.66	4.93	5.42	5.02	Dusp18
320181	0.09	0.01	0.06	0.07	0.07	0.1	Fndc7
66496	57.57	43.51	79.87	51.53	57.24	55.88	Ppdpf
11754	0.08	0.06	0	0.08	0.08	0.02	Aoc3
208117	2.05	1.94	1.26	2.01	2.06	1.73	Aph1b
66044	7.26	6.52	8.22	7.7	8.56	6.84	Dtd1
68259	4.09	4.06	2.62	3.94	4.62	4.31	Ift80
380629	1.86	1.88	1.17	1.77	1.86	1.46	Heca
75785	1.88	1.78	1.62	1.42	1.92	1.5	Klhl24
232431	93.63	92.82	84.45	106.36	105.95	101.93	Gprc5a
13603	0.83	0.56	0.55	0.53	0.6	0.67	Opn3
58212	0.02	0.02	0	0	0.04	0	Srrm3
627626	0.04	0.11	0.08	0.07	0.07	0.13	Ptchd4
224648	4.62	5.17	2.34	5.89	5.47	5.17	Uhrf1bp1
12983	0	0	0	0.01	0	0	Csf2rb
57248	0	0.12	0	0	0	0	Ly6i
227615	12.91	11.12	15.31	11.16	13.48	10.63	Tmem203
103284	9.77	10.26	9.22	9.84	10.11	10.57	Zc3h10
19227	0.9	1.22	1.45	0.64	0.46	0.74	Pthlh
224703	32.37	27.88	38.5	27.24	35.77	30.75	2021-03-02
321019	0.02	0	0	0	0	0	Gpr183
243983	8.21	8.93	6.8	9.57	7.56	9.53	Zdhhc13
78655	32.12	35.86	44.35	41.63	32.22	41.07	Eif3j1
19683	0	0	0.02	0.03	0.02	0	Rdh16
72999	23.92	23.23	20.02	20.25	21.27	20.3	Insig2
12334	93.9	99.07	79.41	114.55	100.94	111.3	Capn2
78267	0.28	0.18	0.12	0.16	0.15	0.2	Klhdc8b
51813	8.27	9.91	10.77	9.7	8.96	10.55	Ccnc
27403	4.06	3.13	1.44	3.47	4.59	3.88	Abca7
74359	4.15	3.31	3.07	3.29	3.65	2.89	4931414P19Rik
74256	6.4	7.4	5.37	7.02	6.46	7.34	Cyld
252875	3.76	4.14	2.76	3.11	2.84	3.8	Mios
78593	0.01	0.01	0	0.01	0.01	0	Nrip3
56360	37.95	39.25	48.37	42.32	35.72	43.4	Acot9
224697	2.43	2.15	1.71	1.98	1.77	1.88	Adamts10
241118	0.02	0	0.02	0.02	0.02	0.06	Asic4
100042424	0.69	0.87	1.25	0.45	0.43	0.31	Gm3837
18595	0.57	0.52	0.26	0.47	0.38	0.23	Pdgfra
70747	2.89	3	1.99	2.23	3.02	2.5	Tspan2
70527	15.84	14.55	11.81	13.6	14.57	13.93	Stambp
11615	105.72	115.57	87.73	107.62	105.83	103.27	Gm4737
235431	2.33	1.75	1.13	1.89	1.85	1.52	Coro2b
100503353	1.58	1.2	1.14	0.94	1.21	1.21	Gm14440
69129	2.45	1.06	2.58	1.27	2.11	1.67	Pex11g
414872	3.48	3.66	1.64	3.81	3.68	3.8	Zyg11b
67197	65.6	71.94	110.29	67.37	66.48	64.49	Zcrb1
216527	43.25	41.7	37.19	44.68	41.33	44.01	Ccm2
67367	5.99	5.69	4.79	5.81	5.04	5.5	Paxbp1
108161	0	0	0.04	0.04	0	0.12	Fam50b
227746	17.43	17.73	20.05	18.11	17.77	17.03	Rabepk
27398	62.72	60.64	96.61	67.11	63.89	61.79	Mrpl2
227059	23.39	23.94	10.18	19.13	19.77	20.51	Slc39a10
74490	0.05	0.02	0.02	0.02	0.02	0.02	Mamstr
18577	0.04	0.05	0.01	0.06	0.01	0.01	Pde4a
100043332	0	0.04	0	0	0	0	Ankrd66
29861	0.8	0.76	0.46	0.41	0.69	0.73	Dpf1
14758	1.85	1.9	1.52	1.09	1.2	1.33	Gpm6b
228875	28.09	30.36	30.7	32.06	29.75	32.02	Slc35c2
11964	22	23.9	16.64	24.37	23.07	25.2	Atp6v1a
224105	14.51	15.08	9.29	15.85	14.33	14.27	Pak2
382073	6.7	6.63	6.83	5.48	5.7	7.35	Ccdc84
239760	0	0.09	0	0	0	0	Gm4943
67991	7.52	6.83	4.64	7.61	8.46	8.15	Nacc2
319670	0.58	0.57	0.37	0.51	0.52	0.78	Eml5
239647	11.88	9.12	8.2	8.6	11.27	9.47	Pced1b
30841	8.2	9.13	6.11	8.85	8.44	8.63	Kdm2b
68026	71.93	79.26	75.98	69.61	69.62	72.79	2810417H13Rik
18185	0	0.03	0	0.03	0	0.03	Nrl
100042295	2.02	3.83	4.76	4.42	3.55	3.15	Gm3776
212937	0	0	0.02	0	0	0	Tifab
56367	23.32	27.91	28.66	22.08	20.75	25.19	Scoc
320795	21.95	21.98	12.8	20.98	22.49	21.56	Pkn1
16834	17.83	17.16	12.28	18.84	18.6	18.25	Cog1
21402	115.93	119.85	201.87	115.01	113.21	124.77	Skp1a
654818	0.05	0	0	0	0	0	Smco3
58237	2.51	1.96	2.63	1.23	2.1	0.77	Nkain4
72821	0.01	0.04	0.03	0	0.01	0	Scn2b
279653	2.8	2.99	1.85	3.2	2.71	3.06	Pcdh19
320534	10.55	8.58	4.62	9.04	10.04	9	Tmem104
67466	13.15	12.92	13.06	13.46	13.53	14.32	Pdcl
22409	149.1	150.52	167.49	165.61	157.43	158.81	Wnt10a
66482	6.06	6.85	3.67	6.23	6.09	6.39	Exoc2
67706	38.64	35.7	45.19	31.57	35.56	34.62	Tmem179b
171580	0	0	0	0.07	0	0	Mical1
54194	6.59	6.14	6.61	6.68	7.69	6.88	Akap8l
380855	2.04	1.93	1.25	1.98	2.01	2.1	Rsl1
503610	29.72	30.96	19.84	35.35	31.65	31.8	Zdhhc18
216131	10.82	11.58	5.4	12.32	11.25	11.8	Trappc10
109731	0.15	0.04	0.1	0.08	0.11	0.06	Maob
71941	13.23	13.62	14.79	13.8	13.02	13.6	Cars2
17219	98.74	107.4	89.44	102.34	97.3	102.18	Mcm6
69126	100.43	100.76	184.86	84.8	80.03	95.9	1810022K09Rik
226041	0	0	0	0.01	0	0	Pgm5
100043811	0	0.04	0	0	0	0	Gm4664
69481	0.11	0	0.04	0	0	0	Actl9
20196	37	39.67	69.1	36.59	38.4	43.52	S100a13
66113	0.1	0.24	0.23	0.13	0.26	0.18	Apoa5
19328	46.39	43.52	49.62	46.88	43.08	46.46	Rab12
18007	14.09	13.97	5.44	14.34	14.12	13.79	Neo1
69623	1.21	1.06	0.34	0.96	1.07	1.31	Zfp33b
107885	1.91	2.04	2.99	1.57	2.48	1.4	Mthfs
78767	1.68	1.42	1.37	1.72	1.57	1.75	Efcab11
77305	24.06	24.45	19.83	24.71	22.91	24.87	Wdr82
232035	0.09	0.13	0.06	0.08	0.02	0.12	Ccser1
434204	6	4.96	4.15	4.84	5.61	4.76	Whamm
18491	0.06	0.05	0.02	0.06	0.07	0.06	Pappa
76974	0	0.16	0.08	0	0	0.32	Urah
209239	1.01	1.15	0.66	1.22	1.04	1.19	Gan
22289	6.28	6.79	2.9	5.62	5.97	6.11	Kdm6a
246229	7.85	8.08	4.65	7.65	7.52	8.36	Bivm
622307	0.07	0.03	0.02	0.02	0	0.02	5830473C10Rik
320974	4.49	3.6	1.65	1.53	2.4	2.19	Lrrn4
67238	13.97	15.24	13.54	14.91	14.13	13.92	Fam220a
67207	16.34	16.41	19.74	18.59	16.93	16.9	Lsm1
13383	15.54	15.63	10.75	15.41	14.76	15.69	Dlg1
101502	7.22	6.15	4.27	4.51	5.45	4.46	Hsd3b7
83946	3.15	2.82	1.88	2.34	2.45	2.56	Phip
71684	7.44	6.17	6.51	7.31	7.02	6.72	Rbm43
56043	10.06	9.93	12.34	10.5	9.37	10.14	Akr1e1
69852	4.99	5.95	3.36	5.09	4.53	4.69	Tcf23
17350	8.96	9.6	9.33	8.65	9.67	9.52	Mlh1
67020	3.19	3.19	2.62	1.92	2.41	1.47	Tmem88
27410	7.86	7.54	2.98	7.3	8.72	7.35	Abca3
74035	17.16	19.7	14.04	24.17	18.69	20.1	Nol9
13038	0.03	0	0	0.07	0	0	Ctsk
19065	0.6	0.36	0.05	0.3	0.27	0.62	Npy4r
107939	38.99	40.02	15.33	42.32	38.57	37.71	Pom121
56809	4.68	4.9	5.33	5.65	5.04	5.08	Gmeb1
243862	0.03	0.06	0	0.03	0	0	Psg22
12821	0.16	0.05	0.08	0.08	0.16	0.1	Col17a1
97484	26.96	25.79	26.48	24.29	24.4	23.08	Cog8
72361	10.28	9.77	6.9	8.37	9.06	9.16	Ces2g
66972	13.99	12.01	4.73	10.14	12.27	10.27	Slc25a23
70439	24.26	26.25	18.26	25.44	25.19	24.59	Taf15
71903	0.17	0.09	0.04	0.05	0.08	0.04	Ces2f
15242	5.24	5.15	5.14	4.02	5.37	5.55	Hhex
67534	5.81	7.36	3.46	8.16	6.47	7.58	Ttll4
102641068	0.11	0.08	0.03	0.05	0.08	0.03	Gm38529
13593	1.13	0.89	0.5	1.16	1.13	1.15	Ebf3
20022	141.76	132.09	185.54	125.69	128.48	132.81	Polr2j
56187	8.41	9	9.94	8.99	9.1	8.89	Rabggta
216976	0.12	0.07	0.14	0.08	0.12	0.06	BC030499
12909	23.72	24.41	26.97	27.61	23.94	25.02	Crcp
20661	29.55	25.34	12.47	24.43	28.91	24.43	Sort1
208748	0.76	0.6	0.43	0.39	0.5	0.35	Prrg3
69277	0.63	0.54	0.66	0.54	1.04	1.8	3300002I08Rik
57258	3.39	3.82	1.13	4.37	3.34	4.68	Xpo4
30056	10.63	14.93	19.02	15.26	13.23	14.59	Timm9
17684	36.21	35.9	31.4	36.71	33.43	32.93	Cited2
11552	0.01	0.04	0.01	0.02	0.01	0	Adra2b
226169	25.49	29.03	14.66	30.21	25.15	26.22	Pprc1
241289	0	0.01	0	0.01	0	0.02	Ppp1r26
22248	24.89	22.86	23.86	20.6	24.84	20.78	Unc119
16149	0.3	0.4	0.24	0.08	0.25	0.21	Cd74
67914	14.08	15.54	12.19	15	17.32	15.17	Coq9
20163	46.31	46.65	27.01	51.32	50.24	49.55	Rsu1
70604	8.2	8.52	7.72	8.54	9.42	8.48	Dnajb14
99662	0.02	0.04	0	0.06	0	0.04	Eps8l3
84505	11.6	12.08	5.41	13.55	11.79	12.82	Setdb1
76668	0	0	0.03	0.03	0	0	Mdh1b
13641	60.71	49.37	32.61	38.5	50.58	42.44	Efnb1
229877	30.07	31.37	27.29	34.85	30.54	32.31	Rap1gds1
66787	7.45	6.89	7.79	6.77	6.38	6.89	Gskip
63955	2.95	2.61	2.19	2.46	3.13	2.56	Cables1
68051	88.93	99.15	168.5	79.07	82.4	78.01	Nutf2
76375	7.17	6.77	4.6	6.56	5.55	6.09	Det1
626316	0.52	0.44	0.34	0.52	0.37	0.42	Gm13051
268949	0.5	0.44	0.65	0.61	0.48	0.43	Dpcr1
218544	1.24	0.93	0.7	1.17	1	1.05	Sgtb
76088	0.63	0.61	0.32	0.78	0.48	0.74	Dock8
67956	104.72	107.1	82.95	110.53	104.39	110.41	Kmt5a
27219	0	0	0.06	0	0.06	0.03	Sgk2
110891	0	0	0	0	0.01	0	Slc8a2
271711	0	0	0	0	0	0.05	Tmem169
109637	0.56	0.28	0.66	0.44	0.2	0.43	Upk1a
63873	0.31	0.25	0.24	0.17	0.31	0.31	Trpv4
231151	5.79	5.82	3.41	6.38	5.39	6.09	Tada2b
11475	1.92	1.21	0.8	1.2	1.01	1.23	Acta2
19354	0.09	0.06	0.14	0.18	0	0.05	Rac2
100503240	0	0	0	0.01	0	0	Trpc5os
381921	10.45	10.02	5.68	10.91	11.42	11.24	Taok2
16772	0.03	0.03	0	0.01	0.01	0	Lama1
69104	91.31	99.78	108.38	97.18	85.5	95.97	2021-03-05
30945	11.85	11.99	7.58	11.36	11.63	12.32	Rnf19a
226421	7.79	7.2	5.61	7.77	7.9	8.46	Rab7b
75612	26.8	27.46	14.38	27	29.04	25.73	Gns
231858	0.23	0.3	0.16	0.39	0.36	0.5	Radil
68566	0	0.05	0.05	0	0	0	Caly
74407	0.05	0.12	0.14	0.05	0.07	0.07	Ttc25
226182	4.89	4.66	4.52	4.89	4.3	4.61	Taf5
18994	0.02	0	0	0	0	0	Pou3f4
16561	8.21	8.5	4.12	7.97	7.78	8.67	Kif1b
26920	3.55	3.53	1.53	3.93	3.85	4.08	Cntrl
22364	0.2	0.46	0.67	0.49	0.36	0.49	Vpreb3
67507	0	0.06	0	0	0.06	0	1700019N19Rik
56524	12.26	13.78	16.24	14.46	11.25	14.06	Mpp6
67223	17.27	22.46	29.66	24.2	17.61	21.51	Rrp15
234839	42.34	41.93	16.55	41.71	40.24	37.43	Piezo1
76390	0	0.05	0.03	0.02	0.01	0.01	Zfp735
14359	28.08	28.92	23.07	27	27.86	30.27	Fxr1
218490	612.68	634.84	1159.77	636.98	584.41	638.14	Btf3
22145	15.34	15.02	15.83	10.65	10.65	11.58	Tuba4a
66890	68.06	66.24	66.77	71.24	73.27	70.81	Lman2
140482	20.33	16.16	17.51	14.72	18.36	15.33	Zfp358
22115	0.04	0.04	0	0	0	0.04	Tssk2
18483	51.84	41.4	36.56	33.45	47.91	38.15	Palm
78100	10.86	11.15	10.93	10.21	10.28	10.82	Msantd4
380916	5.3	5.12	3.05	5.43	5.39	5.66	Lrch1
68106	45.45	44.25	43.39	43.9	47.63	47.73	Nt5c3b
17535	7.35	9.06	6.72	8.21	7.65	8.14	Mre11a
109900	29.07	26.52	28.58	24.95	28.26	27.17	Asl
286940	61.94	66.57	24.67	74.65	69.73	69.43	Flnb
56844	32.4	28.8	39.77	28.63	31.38	32.42	Tssc4
171286	2.6	2.52	2.19	1.58	1.89	1.72	Slc12a8
13522	0.29	0.28	0.37	0.31	0.28	0.32	Adam28
230577	3.99	3.57	3.22	3.91	4.21	3.5	Pars2
384806	0	0.02	0	0	0	0	Adam20
338363	2.01	1.75	1.47	1.59	1.71	1.61	Tmem241
54131	30.41	29.95	36.13	30.26	32.96	28.88	Irf3
18782	0.02	0.03	0.05	0.05	0	0.02	Pla2g2d
69940	12.89	13.49	9.82	12.68	12.41	13.16	Exoc1
22367	15.25	16.52	18.52	16.74	15.37	16.78	Vrk1
76571	0.13	0.16	0.15	0.23	0.26	0.13	Styxl1
66993	13.52	12.72	13.62	12.42	13.76	12.52	Smarcd3
23825	405.09	403.2	650.13	375.22	385.96	355.74	Banf1
72074	0	0	0.02	0	0	0.02	Anks4b
109658	22.3	23.83	16.8	25.39	22.79	23.42	Txlna
76479	30.77	34.37	38.28	35.96	31.57	34.45	Smndc1
108167333	0.19	0.17	0.06	0.12	0.11	0.12	LOC108167333
56351	103.8	115.72	135.96	115.25	104.81	118.23	Ptges3
70024	24.08	25.71	19.6	29.84	24.43	27.94	Mcm10
67863	74.46	70.16	92.07	70.18	77.28	69.22	Slc25a11
229363	22.9	25.44	27.17	24.82	22.7	26.31	Gmps
103841	17.35	16.27	11.21	15.61	18.58	17.48	Cuedc1
100041179	0	0	0	0	0.03	0	Gm3183
67936	26.37	27.38	34.79	30.17	25.19	28.29	Wdr55
110213	294.09	273.94	285.85	262.76	290.55	262.78	Tmbim6
76041	0	0	0	0	0.04	0	Ccdc125
70152	5.42	4.3	3.07	3.72	4.3	3.5	Mettl7a1
80749	2.62	2.62	1.97	2.15	2.43	2.54	Lrfn1
381438	0	0.07	0.07	0	0	0	Gm5148
19045	652.76	638.13	689	599.55	636.2	616.48	Ppp1ca
234069	17.07	18.14	13.98	16.83	17.18	17.99	Pcid2
277010	50.44	41.58	31.26	42.11	50.26	43.4	Marveld1
22376	0	0.03	0	0	0	0.06	Was
68737	0.45	0.38	0.39	0.6	0.5	0.64	Angel1
56190	22.76	26.32	27.91	32.19	24.05	28.11	Rbm38
26432	23.4	21.55	15.2	19.72	20.82	20.8	Plod2
21771	38.39	44.12	37.71	46.06	34.01	39.14	Cirh1a
673094	244.69	214.89	300.64	212.12	242.1	218.59	Cd99
74776	24.42	25.33	34.95	24.65	25.8	25.35	Ppa2
71030	0	0	0.01	0	0	0.03	4933403O08Rik
56516	24.73	23.39	16.43	24.5	23.96	24.23	Rbms2
226251	18.19	17.74	9.01	21.94	21	22.69	Ablim1
71481	0.45	0.44	0.1	0.45	0.43	0.39	Alpk1
14613	0	0	0	0	0	0.02	Gja5
77371	5.74	6.2	3.01	6.2	5.53	6.2	Sec24a
59014	25.11	32.55	37.92	37.56	25.86	32.21	Rrs1
50926	33.73	35.37	33.44	36.45	30.51	34.91	Hnrnpdl
12371	5.28	4.64	3.15	4.77	5.31	5.05	Casp9
100043645	0	0	0.16	0	0	0	Gm4567
66821	15.34	15.06	18.29	13.85	15.08	15.33	Bcs1l
77505	0.33	0.25	0.13	0.34	0.33	0.39	Dnhd1
668310	0	0	0	0	0	0.02	Cc2d2b
666528	0	0	0.01	0	0.01	0	Zfp541
68126	0.57	0.14	0.27	0.51	0.38	0.17	Fahd2a
239743	0	0.02	0.06	0	0.02	0	Klhl6
18008	4.29	4.43	2.46	5.18	4.87	4.95	Nes
56464	0.31	0.32	0.23	0.08	0.31	0.16	Ctsf
107895	1.7	1.67	0.79	1.59	1.54	1.66	Mgat5
230234	24.88	24.11	17.25	30.29	26.56	27.27	Fam206a
13858	9.27	9.16	8.39	9.67	9.94	10.25	Eps15
109359	7.73	7.59	5.44	7.54	7.04	6.81	Fam175b
101533	0	0	0	0.04	0.03	0	Klk9
235040	13.02	12.29	12.87	13.17	15.2	14.04	Atg4d
319800	0	0	0.09	0	0	0	Slc22a30
16523	0.05	0	0	0	0.02	0.02	Kcnj8
67763	58.79	61.77	66.27	68.18	65.49	66.47	Prpsap1
12862	0.32	0.08	0.08	0	0	0.08	Cox6a2
66180	87.09	72.96	71.45	76.63	89.24	79.65	P3h4
56790	11.88	12.5	6.19	12.23	12.03	11.39	Supt20
12387	113.94	115.89	89.94	114.8	117.85	122.13	Ctnnb1
69579	1.01	0.94	0.86	1.31	1.09	0.96	2310034P14Rik
110794	0	0	0	0	0	0.04	Cebpe
68475	82.22	87.65	147.67	85.18	92.25	90.68	Ssna1
60599	4.9	3.91	2.65	3.71	5.06	3.98	Trp53inp1
268515	3.77	3.47	1.57	3.88	3.82	3.71	Bahcc1
12799	10.23	8.28	8.81	9.89	11.13	9.79	Cnp
18193	4.41	4.86	1.87	5.34	4.89	5.61	Nsd1
14583	17.73	17.97	9.54	16.52	16.71	17.55	Gfpt1
20317	0.24	0.1	0.2	0.14	0.21	0.1	Serpinf1
15505	49.02	59.01	47.43	63.66	51.63	59.05	Hsph1
67978	3.05	3.52	1.89	3.07	3.95	3.16	Tctn2
20856	0	0.03	0.03	0	0.03	0	Stc2
234673	0.16	0.08	0.16	0.03	0.05	0.08	Ces2e
282619	152.77	139.72	188.07	135.64	153.19	140.35	Sbsn
23948	3.66	3.09	2.62	0.92	0.92	0.77	Mmp17
12380	20.46	21.99	16.14	22.26	20.66	21.71	Cast
66627	8.58	7.4	12.61	7.62	9.7	7.77	Ogfod2
15161	32.43	32.83	11.91	36.11	35.19	32.79	Hcfc1
16796	146.92	147.05	103.22	169.78	165.67	165.57	Lasp1
232164	14.74	15.63	12.61	17.23	17.23	18.6	Paip2b
574418	0.04	0.22	0.06	0.04	0.09	0.09	Serinc4
75619	8.84	11.93	10.42	12.26	9.59	11.97	Fastkd2
81845	21.38	19.83	29.61	19.49	20.33	20.75	Gpank1
64424	5.51	6.42	7.82	6.26	5.17	7.11	Polr1e
50887	16.7	15.04	20.79	12.61	12.4	13.91	Hmgn5
17920	2.56	2.56	1.5	2.37	2.75	2.39	Myo6
381668	11.98	10.96	8.09	11.52	12.32	11.04	Fbrsl1
17069	26.81	19.18	21.48	11.44	12.14	10.79	Ly6e
104418	50.9	43.77	29.78	46.62	51.23	44.91	Dgkz
231532	0.02	0.01	0	0	0.02	0	Arhgap24
11848	242.38	236.64	269.37	236.3	233.12	238.35	Rhoa
78240	0.8	0.09	1.2	0.27	0.18	0	Cst11
59092	15.03	15.11	15.63	17	16.88	16.33	Pcbp4
76872	0.13	0.14	0.04	0.16	0.09	0.11	Ccdc116
15199	0.59	0.6	0.91	0.25	0.15	0.49	Hebp1
654470	2.04	1.68	1.04	1.82	2.25	2.19	Tctn1
19663	118.3	97.71	86.14	84.4	102.9	81.16	Rbpms
67383	20.23	20.38	19.88	21.23	18.15	22.3	Carnmt1
78560	7.99	6.29	3.02	4.12	5.6	4.44	Adgra2
74470	1.84	2.29	1.02	1.74	1.6	1.89	Cep72
22390	13.48	12.65	10.13	13.47	13.52	13.41	Wee1
22759	1.33	0.88	0.84	0.88	1.32	0.76	Zfp97
30937	23.21	22.1	18.31	19.98	21.33	20.09	Lmcd1
104318	52.01	50.79	37.36	57.47	53.43	53.75	Csnk1d
22003	423.8	454.21	470.09	450.31	393.69	447.82	Tpm1
17868	0.1	0.04	0.06	0.05	0.04	0.01	Mybpc3
100502698	11.04	11.94	6.56	12.71	12.32	12.79	Rubcn
58172	8.3	9.24	4.65	10.3	8.98	9.55	Sertad2
18038	13.14	12.28	16.28	11.04	14.35	13.51	Nfkbil1
66308	3.56	3.51	5.84	4.26	3.9	4.05	Mplkip
66912	43.15	51.8	51.67	52.06	44.98	49.67	Bzw2
73010	0.02	0.01	0.02	0.02	0.02	0.03	Gpr22
104303	55.83	57.64	41.87	53.78	53.85	54.67	Arl1
67784	1.58	1.6	0.76	1.19	1.16	1.23	Plxnd1
98685	12.68	12.64	9.45	13.37	13.52	12.91	Trmt1l
66887	16.15	14.3	15.21	14.14	14.02	13.94	Lonp2
22184	10.45	11.19	12.51	12.19	9.78	11.25	Zrsr2
243616	0	0	0	0.01	0	0	Slc6a11
66442	22.98	23.57	28.35	24.34	24.5	26.83	Spc25
73412	0	0	0.03	0	0	0.03	Nme8
238673	7.14	8.53	7.88	8.81	7.25	9.57	Zfp367
18552	0.75	0.75	0.37	1.02	1.12	1.55	Pcsk5
100039815	0.61	1.47	2.97	0.54	0.37	1.06	Gm2436
56294	17.26	17.52	11.79	17.96	16.42	17.36	Ptpn9
106344	26.83	30.34	45.29	28.61	26.91	29.7	Rfc4
434179	1.5	1.33	1.67	0.75	1.33	0.95	Gm5595
102633888	0.01	0	0.01	0	0	0	Gm31606
338370	0	0	0.02	0	0	0	Nalcn
21899	0.09	0.11	0	0.05	0.02	0.07	Tlr6
17237	21.2	17.91	9.47	17.72	20.02	17.25	Mgrn1
74666	0.19	0.07	0.13	0.04	0.05	0.07	4930432K21Rik
67712	2.2	3.12	2.07	3.42	2.39	3.23	Slc25a37
381801	26.31	28.42	22.06	31.01	27.55	29.23	Tatdn2
100737	5.06	5.12	2.9	4.87	4.97	5.42	Dcun1d4
57875	17.71	18.81	18.31	21.28	20.45	19.96	Angptl4
12560	18.48	18.83	12.38	15.87	16.64	15.57	Cdh3
16005	0.02	0	0.02	0.02	0	0	Igfals
56529	63.39	63.35	92.07	57.27	63.06	63.18	Sec11a
109075	38.85	36.05	60.08	36.02	38.79	38.73	Exosc4
53897	0	0.03	0.03	0	0	0.03	Gal3st1
216197	15.53	14.96	13.25	9.95	9.16	8.9	Ckap4
15559	0.06	0.08	0.01	0.06	0.02	0.05	Htr2b
241915	2.24	2.59	0.84	2.59	2.31	2.89	Phc3
67582	5.61	6.53	5.59	5.18	4.68	4.1	Slc25a26
106957	9.81	11.29	8.53	13.05	10.43	10.84	Slc39a6
22697	10.26	8.34	6.77	8.29	9.44	8.99	Zscan21
12468	233.37	260.68	299.41	265.41	239.76	252.54	Cct7
73162	6.71	7.51	5.3	8.64	8.32	9.81	Otud3
68346	4.48	4.29	6.03	4.11	4.62	3.48	Sirt5
224111	2.72	3.09	1.6	3.34	3.19	3.48	Ubxn7
103213	9.88	10.04	7.54	9.55	10.95	8.63	Traf3ip2
69717	0	0	0.07	0.07	0.05	0.05	Gm10499
14073	4.13	3.76	2.76	3.97	5.38	3.8	Faah
211961	0.03	0.01	0	0.02	0.01	0.01	Asxl3
12572	3.16	3.65	4.4	3.57	3.28	3.6	Cdk7
71889	40.61	30.04	26.75	27.65	40.08	30.08	Epn3
19660	0.64	0.8	1.85	0.16	0.32	0.71	Rbp2
67665	13.29	13.45	9.66	13.63	13	14.22	Dctn4
76282	5.88	4.44	5.23	3.76	4.29	3.93	Gpt
15356	11.72	11.89	16.51	10.76	12.88	10.52	Hmgcl
79456	10.54	11.13	7.32	11.51	11.23	12.01	Recql4
11692	34.27	30.78	49.71	33.9	29.72	32.54	Gfer
68188	54.24	52.65	29.4	52.58	56.44	50.43	Sympk
76947	12.54	13.74	20.9	16.22	12.93	14.44	Ndufaf6
245671	0.01	0	0.01	0.03	0	0.01	Klf8
52120	18.34	19.02	16.68	17.62	18.7	18.03	Hgsnat
75668	0.81	0.83	0.73	0.42	0.54	0.78	Rasl10a
72401	0	0	0	0.02	0	0	Slc43a1
242553	0.01	0.02	0.01	0.01	0.02	0	Kank4
71957	25.76	25.93	27.03	25.22	27.23	27.54	Cpsf3l
217116	0	0.02	0.02	0	0.02	0	Spata20
11836	31.44	29.95	22.58	28.63	30.12	29.54	Araf
109676	0.1	0.14	0.04	0.15	0.09	0.09	Ank2
67118	5.16	4.58	4.92	4.28	4.75	5.04	Bfar
72640	3.28	2.83	1.68	3.22	2.78	2.85	Mex3a
105663	5.98	5.62	3.93	5.34	6.02	5.37	Thtpa
22153	0.09	0.07	0.02	0.07	0.21	0.1	Tubb4a
11699	0.2	0.49	0.71	0.2	0.44	0.52	Ambp
66397	44.07	46.15	63.86	43.2	43.93	45.68	Sar1b
230761	15.07	11.58	7.32	10.65	13.3	10.81	Zfp362
17841	0.22	0.72	1.49	0.82	0	0	Mup2
260302	11.15	11.73	7.24	14.26	13.17	13.6	Gga3
71766	85.22	81.44	51.25	88.83	89.28	81.9	Raver1
73419	12.02	12.89	13.15	11.87	12.44	12.69	Armt1
272322	1.58	1.9	1.52	1.73	1.35	1.38	Arntl2
22756	0.79	0.71	0.61	0.81	0.88	0.91	Zfp94
78825	7.05	7.71	4.48	8.51	7.18	8.2	Desi2
108657	36.4	32.13	22.91	36.37	39.87	34.04	Rnpepl1
56299	10.15	8.92	10.54	7.89	9.48	8.67	Fkbpl
67122	0.9	0.68	0.81	0.83	0.81	0.59	Nrarp
14158	7.25	7.57	5.4	6.69	6.58	6.35	Fer
16399	0.34	0.15	0.26	0.22	0.27	0.28	Itga2b
545938	0.66	1.06	0.78	0.63	0.65	0.59	Zfp607
100042025	6.92	3.68	15.55	10.37	10.74	11.67	Gapdh-ps15
71746	2.77	2.91	1.74	2.95	3.16	2.89	Rgl3
20607	0.03	0	0	0	0.04	0	Sstr3
16872	0.08	0.03	0	0	0.03	0.06	Lhx4
214444	2.67	2.79	1.23	2.78	2.96	2.89	Cdk5rap2
67886	5.48	6.08	2.25	5.83	5.39	5.59	Camsap2
13590	7	6.57	8.74	5.86	7.39	5.97	Lefty1
16637	0.24	0.16	0.45	0.27	0.05	0.2	Klra6
76219	0.06	0.12	0.05	0	0	0	Arxes1
259300	83.45	75.27	49.02	80.91	85.4	79.2	Ehd2
16939	2.13	2	2.11	2.01	2.57	2.48	Lor
67025	1139.48	1126.57	2157.06	1104.82	1164.76	1201.41	Rpl11
14375	33.45	39.85	38.46	40.59	35.35	40.55	Xrcc6
67442	13.63	11.18	9.49	11.1	11.51	11.61	Retsat
18081	94.25	95.31	106.53	96.28	104.55	95.51	Ninj1
68073	20.51	18.73	31.16	22.68	21.87	18.48	Fam173b
21414	1.12	1.14	0.9	1.58	1.32	1.71	Tcf7
93714	0.22	0.41	0	0.05	0.13	0.13	Pcdhga6
77254	56.11	52.54	53.68	45.23	51.13	49.54	Yif1b
16534	38.75	44.01	44.5	45.59	43.7	45.28	Kcnn4
667055	0	0	0.03	0	0	0.03	Gm9992
260299	12.86	11.14	11.13	8.75	11.31	8.95	Cadm4
319186	2.09	0.88	0.76	1.55	0.85	1.66	Hist1h2bm
56457	83.36	79.67	59.02	81.18	86.07	79.53	Clptm1
69540	0.12	0.5	0.19	0.54	0.38	0.42	Klk10
16782	5.74	5.49	5.15	5.21	4.51	5.07	Lamc2
73463	0	0	0	0	0.03	0	Als2cr11
14563	0	0	0.02	0	0	0	Gdf5
100017	49.71	49.65	44.75	51.84	53.73	51.39	Ldlrap1
240888	2.69	2.53	1.42	2.65	2.45	2.68	Gpr161
237823	8.82	9.3	5.46	9.76	9.22	9.77	Pfas
233065	14.15	13.45	18.73	13.57	14.72	12.29	Alkbh6
14133	0.04	0.12	0	0	0	0.04	Fcna
70495	18.03	17.62	22.25	15.15	15.87	16.68	Atp6ap2
74400	0	0.04	0	0	0	0.02	Zfp819
258270	0	0	0	0	0.06	0	Olfr448
66977	29.53	30.49	27.1	30.92	31.3	32.46	Nuf2
192662	871.68	868.89	844.58	878.86	876.53	875.36	Arhgdia
625360	0.11	0.04	0	0	0	0.03	BC147527
19771	0	0	0	0	0	0.05	Rlbp1
353282	0	0.01	0.01	0.02	0	0	Sfmbt2
319636	0.18	0.19	0.17	0.18	0.18	0.15	Fsd1l
73382	0	0.05	0	0	0	0	Prss52
17427	3.26	3.64	3.23	4.56	3.62	4.02	Mns1
240174	4.79	5.49	2.26	5.48	5.35	5.31	Thada
378702	80.54	76.72	144.26	76.04	83.41	75.01	Serf2
56698	15.3	16.06	20.87	15.72	14.25	16.08	Phax
81910	48.01	43.77	35.27	44.01	47.57	44.59	Rrbp1
227545	0.03	0	0.01	0	0.03	0.06	Proser2
97884	7.14	7.39	5.54	7.59	7	6.93	B3galnt2
637578	0	0.01	0.15	0	0	0.04	Gm20765
18188	0.97	0.7	1.29	0.55	0.87	0.56	Nrtn
18633	14.1	12.37	19.21	11.37	14.38	12.39	Pex16
15205	19.25	17.71	22.64	18.27	17.8	19.07	Hes1
665700	0	0.01	0.01	0	0	0	Hmcn2
14130	0	0	0	0.04	0	0	Fcgr2b
69572	4.25	3.24	5.11	2.92	4.35	2.95	Mfsd3
22608	605.95	632.1	566.55	641.43	597.71	629.43	Ybx1
380732	0.13	0.27	0.45	0.2	0.15	0.3	Milr1
66086	18.25	18.29	23.84	16.41	17.84	17.02	Fopnl
14772	1.93	1.47	1	1.07	1.44	1.8	Grk4
52670	0.32	0.43	0.23	0.42	0.17	0.16	Cpsf4l
11517	1.72	1.49	0.9	0.8	1.36	1.19	Adcyap1r1
14735	7.07	6.32	5.38	5.75	7.63	6.32	Gpc4
53885	7.4	6.82	5.39	7.25	7.9	7.56	Nphp1
67332	171.55	193.61	268.7	174.64	168.39	189.32	Snrpd3
213068	0.46	0.95	0.86	0.94	0.56	0.87	Tmem71
18198	0	0.01	0	0	0	0.01	Musk
329015	25.49	22.17	13.21	23.14	26.91	23.05	Atg2a
66469	0.54	0.07	0.39	0.13	0.07	0.07	Fam213b
74316	28.75	24.05	29.59	27.36	27.81	27.88	Isca2
75425	10.42	10.96	5.26	11.77	11.24	10.23	Tti1
22190	532.94	513.14	389.27	512.39	543.5	491.14	Ubc
241520	0.25	0.14	0.11	0.2	0.15	0.11	Fam171b
12461	233.79	257.24	274.59	257.18	236.2	252.02	Cct2
14680	0.17	0.19	0.06	0.12	0.08	0.06	Gnal
224671	3.95	4.17	2.55	4.5	4.6	4.35	Btbd9
16889	14.66	13.26	8.46	13.04	14.67	14.04	Lipa
67268	872.54	912.17	1189.7	820.95	855.89	881.27	Myl12a
72137	7.34	7.09	7.24	7.54	8.41	7.48	Wdsub1
17183	0.02	0	0	0	0	0	Matn4
12364	2.38	2.18	2.05	1.56	1.85	1.42	Casp12
14344	0.37	0.44	0.32	0.52	0.65	0.62	Fut2
13244	87.08	88.89	80.43	92.33	86.76	87.65	Degs1
326618	290.94	299.99	234.3	268.06	259.34	283.02	Tpm4
74081	2.02	1.96	0.72	1.74	1.82	1.79	Cep350
22036	18.22	18.41	20.94	19.69	18.38	20.28	Traip
70591	4.41	5.09	3.39	4.07	4.85	4.78	5730455P16Rik
268465	14.13	11.26	11.13	11.36	13.55	13.03	Eme1
211499	6.4	6.13	4.21	6.19	5.88	6.58	Tmem87a
214764	2.65	2.68	1.64	2.93	2.38	2.63	Edrf1
69156	11.48	11.15	23.57	12.3	11.57	12.15	Comtd1
113868	25.91	24.54	32.33	23.32	27.12	23.77	Acaa1a
117590	0	0	0	0	0.07	0.02	Asb10
227157	0.02	0.04	0	0	0	0.02	Mpp4
14528	6.05	6.39	7.53	6.83	6.55	6.69	Gch1
100041734	2.02	1.51	1.79	1.66	1.64	2.09	4930522L14Rik
239096	1.2	0.84	0.44	1.13	1.33	0.92	Cdh24
15078	351.42	329.83	488.98	311.49	350.94	334.81	H3f3a
107932	73.25	72.78	35.32	72.56	74.51	71.19	Chd4
269275	0.01	0	0	0	0	0.01	Acvr1c
244059	2.55	2.69	1.15	2.57	2.62	2.5	Chd2
14686	0.06	0.1	0.17	0.15	0.1	0.2	Gnat2
69226	6.79	7.99	7.52	7.01	6.63	8.46	Snx24
56279	0.25	0.29	0.34	0.25	0.25	0.25	Fam69b
60365	43.77	46.83	75.55	47.59	47.56	50.23	Rbm8a
117606	0.07	0.08	0.06	0.01	0.06	0.01	Boc
108168959	0.13	0.13	0.15	0.03	0.1	0.13	LOC108168959
22070	1522.5	1607.52	2354.81	1395.13	1426.48	1472.83	Tpt1
279029	0	0	0.05	0.03	0	0.08	Stkld1
70428	3.71	3.7	2.22	4.21	3.89	4.19	Polr3b
242425	0.01	0.01	0	0	0	0	Gabbr2
385377	0.05	0.09	0.06	0.07	0.09	0.13	Pnma5
20168	152.75	152.07	120.15	137.44	140.76	138.12	Rtn3
79202	4.41	4.81	3.46	6.05	4.3	5.58	Tnfrsf22
102637099	8.08	8.37	2.93	7.86	7.72	7.56	Gm38495
216829	22.86	20.86	20.21	20.94	22.22	20.97	Mmgt2
18799	19.42	17.21	15.3	20.32	22.83	19.08	Plcd1
68145	4.44	5.05	4.06	4.21	4.1	4.62	Etaa1
66797	0.05	0.03	0.04	0.11	0.07	0.07	Cntnap2
65100	0.48	0.46	0.15	0.6	0.19	0.53	Zic5
21855	55.77	47.56	68.85	45.82	56.9	50.8	Timm17b
100503583	1.44	1.26	0.81	1.21	1.37	1.43	Fsbp
244721	1.59	2.01	1.47	1.59	1.44	2.01	Zfp846
11687	0.12	0.15	0.06	0.12	0.21	0.15	Alox15
223669	10.83	11.89	8.96	12.05	9.75	12.43	Zfp7
22065	0	0.02	0	0	0.03	0.03	Trpc3
17155	5.4	5	4.01	5.28	5.63	5.05	Man1a
66313	7.63	7.78	4.33	8.07	7.11	8.2	Smurf2
66653	15.17	14.22	16.75	14.38	12.27	12.7	Brf2
21753	90.92	89.97	87.13	90.5	87.92	93.73	Tes
226757	20.57	20.47	8.93	18.97	20.83	21.66	Wdr26
225339	7.65	8.5	3.54	8.44	8.37	8.09	Ammecr1l
64451	4.01	3.69	1.71	4.1	4.02	4.07	Dip2a
207175	0.7	0.5	0.48	0.49	0.39	0.64	Cetn4
22381	81.8	88.06	142.83	58.75	60.19	69.04	Wbp5
26951	11.44	11.63	9.98	12.69	10.62	11.92	Zw10
19132	1.21	1.03	0.99	0.85	0.96	0.61	Prph
22640	6.83	4.93	4.31	5.43	5.44	5.18	Zfp1
72080	19.94	20.82	20.54	22.81	26.42	25.17	Sapcd2
22704	2.97	2.96	1.49	2.98	2.75	2.9	Zfp46
329731	0	0	0	0.01	0	0	Fam19a3
67755	61.86	65.38	65.68	68.21	60.33	63.44	Ddx47
80284	26.41	24.3	37.72	24.47	26.66	26.47	Smim12
209590	0	0	0	0	0	0.02	Il23r
70419	1.42	1.16	0.95	0.74	1.67	0.86	2810408A11Rik
20924	45.34	44.59	21.6	47.97	51.34	46.16	Supt5
59025	40.17	44.62	40.72	44.78	40.03	44.13	Usp14
319171	386.11	332.09	708.93	347.51	358.59	371.28	Hist1h2ap
380928	15.07	15.13	7.82	18.21	16.61	18.11	Lmo7
68977	8.06	5.7	8.65	4.82	8.01	5.86	Haghl
13105	0	0.03	0.13	0	0	0	Cyp2d9
23850	0.01	0	0	0.01	0.02	0.02	Pappa2
381605	2.41	1.95	1.14	1.88	2.02	1.98	Tbc1d2
100039177	0	0	1.59	0.22	0.37	0.5	Mup16
407823	1.99	1.83	0.86	1.86	2.25	2.02	Baz2b
109778	38.58	36.23	45.43	37.09	40.37	38	Blvra
56434	33.75	32.04	37.02	32.73	34.24	35.07	Tspan3
54387	7.58	7.41	4.17	8.03	8.53	8.39	Mcm3ap
74068	0	0.04	0.04	0	0	0	Asz1
109181	1.99	2.18	0.7	1.84	1.78	1.95	Trip11
233826	1.7	2.39	2.22	1.85	1.86	2.55	Palb2
70359	8.65	8.59	9.1	7.99	8.34	8.42	Gtpbp3
17384	1.14	1.66	1.82	1.13	0.44	0.71	Mmp10
74558	0.96	0.87	0.2	0.77	1.02	0.75	Gvin1
229512	28.2	32.1	19.06	39.51	32.75	37.63	Smg5
234371	15.87	15.9	14.69	16.28	15.13	15.63	Tmem161a
231798	29.71	27.73	19.38	29.02	29.88	29.52	Lrch4
17110	0	0	0	0	0.04	0	Lyz1
664883	1.73	1.79	1.21	1.75	1.6	1.97	Nova1
108672	0.01	0.01	0	0	0	0.01	Zdhhc15
70859	0	0.03	0.1	0.03	0	0.03	Lrrc63
224014	0	0.01	0.01	0.01	0.01	0.02	Fgd4
244562	0.3	0.26	0.23	0.15	0.24	0.08	Abcc12
104082	2.52	2.35	1.15	2.29	2.54	2.52	Wdr7
278676	0	0	0	0.04	0	0	AY358078
94185	6.19	7.36	5.48	10.21	8.24	8.36	Tnfrsf21
75906	3.57	3.93	2.22	3.63	4.39	3.75	Fam184a
66707	0	0.04	0	0	0	0	Nkapl
72429	23.21	24.67	23.76	26.86	26.7	27.43	Dnajc25
14950	151.59	136.99	141.61	152.78	164.36	146.6	H13
242362	5.98	6.11	4.21	5.87	5.15	6.23	Manea
70312	19.95	22.39	14.75	22.92	22.47	22.21	Cactin
117148	0	0.04	0.04	0.07	0.19	0.02	Necab2
66177	153.07	144.2	279.14	138.82	153.41	137.28	Ubl5
69035	47.44	48.03	37.71	48.69	46.47	48.01	Zdhhc3
73649	0.03	0.03	0.02	0.02	0.01	0.03	Cybrd1
102032	11.45	9.55	10.97	7.71	9.93	9.05	Smim19
71805	38.28	40.87	32.65	37.07	35.45	35.56	Nup93
75687	67.02	61.01	23.11	61.85	70.83	58.56	Fam65a
14559	0	0.11	0.04	0	0.07	0.04	Gdf1
230376	5.39	6.04	5.15	5.94	5.47	6.42	Haus6
15366	29.71	31.21	16.12	30.03	29.15	33.41	Hmmr
68927	18.05	18.64	20.4	20.95	16.68	19.87	Ptcd2
279561	0.03	0.03	0.02	0.04	0.06	0.05	Wnk3
20630	281.48	265.67	420.4	276.82	272.28	266.04	Snrpc
14176	0.22	0.28	0.42	0.26	0.1	0.25	Fgf5
72144	9.53	9.31	6.98	8.75	9.12	9.16	Slc37a3
102640586	0	0.02	0	0.02	0.05	0	LOC102640586
67011	10.99	9.54	8.74	10.21	8.4	9.02	Mettl6
107477	0.25	0.03	0.12	0.19	0.21	0.21	Guca1b
13618	0	0	0	0.02	0	0	Ednrb
225215	26.65	30.19	42.93	32.53	25.85	31.17	Rsl24d1
233908	158.78	153.67	125.03	161.26	152.55	162.99	Fus
20939	0	0.08	0	0	0	0	Sva
22688	1.25	1.18	0.57	1.09	0.94	0.91	Zfp26
26896	10.91	11.82	4.67	11.08	10.07	11.17	Med14
89867	1.36	1.25	0.56	0.95	1.27	1	Sec16b
100126773	0	0	0	0	0.04	0.04	Esp34
75087	0	0	0	0	0	0.06	4930505A04Rik
218699	29.37	28.24	15.78	26.26	26.71	26.99	Pxk
103161	0.16	0.25	0.16	0.14	0.05	0.11	Apof
245877	82.72	75.85	49.25	84.78	90.11	79.95	Map7d1
11977	3.67	3.36	1.34	3.28	3.54	3.6	Atp7a
66395	41.95	46.7	30.07	45.7	45.38	45.57	Ahnak
67988	7.82	7.6	6.3	6.71	7.27	7.99	Tmx3
53381	99.38	101.55	145.44	92.27	91.31	97.35	Prdx4
244329	3.87	4.9	2.94	5.37	4.94	4.83	Mcph1
69583	27.68	20.28	24.42	19.49	30.08	23.42	Tnfsf13
67246	4.34	4.05	1.95	3.35	3.71	3.65	2810474O19Rik
20354	0.15	0.07	0.17	0.12	0.16	0.09	Sema4d
70285	21.24	25.47	30.83	26.74	22.55	25.22	Rpf1
218454	1.21	1.29	1.06	1.96	1.1	1.56	Lhfpl2
241547	3.41	2.43	2.31	2.96	3.12	2.79	Harbi1
210105	1.5	1.85	1.22	1.33	1.28	1.48	Zfp719
105247180	0.06	0	0.03	0.01	0.02	0.03	Gm42323
102371	1.7	1.96	1.88	2.52	2.64	2.79	Myzap
330788	1.94	1.99	1.22	1.52	1.57	1.71	Zfp866
208846	3.2	3.54	1.67	3.55	3.66	3.95	Daam1
114584	385.5	381.84	493.34	375.98	403.42	372.89	Clic1
30938	1.55	2.26	1	3.04	2.11	2.61	Fgd3
237558	0.02	0.03	0	0	0	0.08	Myrfl
57782	0.11	0.17	0.29	0.24	0.07	0.16	Rbak
27057	39.14	34.99	22.1	28.91	31.29	28.83	Ncoa4
12842	17.53	14.19	8.14	6.87	9.04	6.98	Col1a1
71984	9.37	9.24	12.29	9.85	10.67	9.02	Sars2
16673	0	0	0.03	0	0.02	0	Krt36
68375	155.58	143.32	233.04	162	166.11	155.79	Ndufa8
11772	81.43	82.45	60.03	88.42	87.12	85.53	Ap2a2
30960	96.37	96.94	105.66	98.54	97.72	98.32	Vapa
245109	0.09	0	0.12	0	0.13	0	Zscan4c
224997	0.05	0.01	0.02	0	0.08	0.03	Dlgap1
11482	0.09	0.14	0.03	0.09	0.14	0.06	Acvrl1
193736	7.84	7.24	3.91	6.14	6.6	7.26	Zbtb12
226245	0	0	0.03	0.03	0.03	0	Plekhs1
382062	0	0.04	0	0.11	0	0	AB124611
13138	70.54	66.77	24.5	62.71	70.14	64.04	Dag1
269033	4.47	5.3	3.37	5.06	3.81	5.38	4930503L19Rik
20203	0	0.03	0	0	0	0	S100b
229937	8.47	11.14	13.49	12.44	10.05	12.76	Znhit6
329828	3.05	2.14	1.52	2.7	3.08	2.84	AI464131
12509	0.71	0.45	0.43	0.24	0.26	0.09	Cd59a
19703	28.84	25.91	37.21	21.12	22.95	21.06	Renbp
319765	14.92	14.52	10.13	14.58	14.49	13.65	Igf2bp2
77519	3.93	3.98	2.88	3.98	3.67	4.22	Zfp266
76408	0.84	0.7	1.2	0.58	0.71	0.44	Abcc3
19285	269.78	253.12	244.37	254.58	276.55	261.99	Ptrf
21930	3.56	3.83	3.67	4.64	4.31	4.32	Tnfaip6
654801	0.87	0.58	0.67	0.69	1.12	0.9	Zfp784
192236	13.85	12.1	7.85	11.17	13.28	10.36	Hps1
12419	48.69	47	33.04	46.78	46.71	47.71	Cbx5
66060	160.85	137.83	183.51	122.49	149.2	129.32	Cystm1
105245545	0	0	0	0	0	0.03	Gm10323
268709	0.43	0.48	0.38	0.36	0.54	0.44	Fam107a
67157	7.78	7.07	7.27	7.59	7.03	9.52	2610301B20Rik
434756	0	0.03	0	0	0	0.03	Akap14
14800	0	0	0	0.01	0	0	Gria2
12412	32.07	34.42	31.22	33.8	31.81	32.97	Cbx1
102640827	0.02	0.02	0	0.04	0.04	0	Gm36803
78913	6.29	7.48	4.55	6.64	6.49	7.13	Ltn1
69632	9.72	9.28	3.67	8.99	9.31	9.22	Arhgef12
103967	0	0.02	0	0.02	0.01	0	Dnm3
70615	0.78	0.74	1.43	0.55	1.04	1.01	Ankrd24
73389	11.4	8.02	5.4	8.29	10.93	9.3	Hbp1
243374	0.03	0.02	0.03	0.02	0	0.03	Gimap8
19208	0.72	0.77	0.95	0.35	0.27	0.27	Ptcra
77976	7.02	7.08	4.16	6.71	5.68	6.4	Nuak1
71240	4.8	4.4	2.61	3.81	4.64	4.02	Osbpl7
665622	1.56	0.65	1.14	0.69	0.21	1.21	Hist1h2br
237868	0.1	0.08	0.06	0.04	0.16	0.1	Sarm1
331524	0.15	0.05	0.16	0.19	0.18	0.14	Xkrx
73747	4.8	3.31	6.54	3.41	4.51	4.4	1110034G24Rik
171530	0.07	0.11	0	0	0	0.05	Ucn2
213696	0.16	0.07	0.05	0.05	0.05	0	Duoxa1
18036	34.41	32.8	44.37	33.57	33.77	32.91	Nfkbib
57342	67.42	67.74	47.19	69.92	71.13	67.9	Parva
27886	18.49	18.21	16.53	18.5	18.59	18.45	Dgcr14
16328	7.57	7.5	3.49	7.87	7.91	7.28	Cep250
399591	0.58	0.94	1.12	0.26	0.38	0.19	Tmsb15l
170483	0.6	0.58	0.51	0.29	0.36	0.43	Grin3b
13855	10.58	11.54	6.83	12.18	10.42	11.26	Epn2
20397	11.89	11.87	7.65	12.89	11.9	12.26	Sgpl1
50931	0.33	0.23	0.22	0.17	0.21	0.1	Il27ra
68205	27.45	28.06	37.35	31.9	33.97	31.31	Urm1
100039086	0.11	0	0	0.15	0.29	0.32	Gm15032
243725	0.01	0	0	0	0	0	Ppp1r9a
69709	1.6	1.66	2.88	1.58	1.73	1.51	Ptrhd1
75599	4.1	3.3	1.7	6.06	5.42	5	Pcdh1
56075	6.72	8.13	9.51	9.25	7.89	8.02	Pdss1
67451	11.18	11.01	9.84	12.68	11.28	12.72	Pkp2
252903	1.91	1.9	1.25	1.67	1.67	2.01	Ap1s3
68427	12.57	10.88	9.17	12.2	13.18	12.02	Slc39a13
66257	8.93	8.73	6.19	7.31	8.77	8.91	Nicn1
19017	0.18	0.17	0.05	0.13	0.22	0.07	Ppargc1a
631797	0.07	0.11	0.04	0.08	0.07	0.07	Fer1l6
94253	0.03	0.02	0.02	0.01	0.02	0.02	Hecw1
72371	0.74	0.79	0.86	0.93	0.69	0.72	2210408I21Rik
18419	0	0.01	0	0	0	0	Otog
102640527	0.02	0	0.02	0.02	0.02	0.02	Gm36566
399568	6.64	6.71	3.92	6.84	7.31	6.97	BC052040
23871	14.17	14.91	10.31	15.32	13.95	15.2	Ets1
72181	3.37	4.32	2.57	4.81	3.97	3.75	Nsun4
271221	0.12	0.06	0.05	0.02	0.06	0.06	5031414D18Rik
22130	4.14	4.27	2.74	3.48	3.98	4.02	Ttf1
75104	0	0	0.02	0	0	0	Mmd2
209497	10	10.47	6.95	10.42	10.52	10.7	Tmem164
67053	8.34	9	11.98	9.6	7.98	10.06	Rpp14
74167	32.19	29.33	35.93	34.11	30.67	31.19	Nudt9
73942	1.49	1.61	1.94	1.89	1.96	2.06	Fam151b
65111	56.25	55.45	76.95	61.24	58.12	60.54	Dap3
68497	4.26	3.9	1.66	3.81	4.37	3.83	Arel1
229473	4	4.18	2.47	4.71	4.48	4.2	D930015E06Rik
245174	1.19	1.09	0.88	0.84	0.97	1.06	Zfp937
27049	3.08	3.18	1.41	3.04	2.92	2.89	Etv3
68177	5.08	5.01	6.92	4.33	4.46	4.45	Ebpl
71474	9.47	8.79	5.92	9.52	9.34	8.89	Ppp6r2
384701	0.12	0	0.03	0	0.14	0.03	Usp17ld
621976	0.78	0.93	0.32	0.73	0.73	0.85	Tmem170b
12032	0.02	0	0	0	0.02	0	Bcan
14601	0.05	0	0.03	0	0.01	0.13	Ghrh
72972	3.41	3.46	1.97	3.08	2.97	3.34	Ccser2
14171	0	0	0	0	0	0.04	Fgf17
13000	38.02	37.72	36.55	38.69	32.92	32.61	Csnk2a2
24045	78.68	70.38	67	75.15	89.74	79.62	Scamp3
12785	175.57	204.22	310.8	208.44	169.59	208.03	Cnbp
56175	0.02	0	0	0	0	0	Bace2
243906	0.45	0.38	0.25	0.32	0.34	0.36	Zfp14
17952	0.12	0.06	0.06	0.06	0.12	0.07	Naip6
20362	47.45	46.02	25.9	51.83	55.01	50.78	2021-09-08
382083	0.21	0.09	0.12	0.26	0.14	0.28	Snx22
21366	111.51	114.02	41.56	131.1	115.66	117.62	Slc6a6
20449	1.11	0.85	0.6	0.41	0.64	0.57	St8sia1
20216	0	0.02	0.13	0	0.02	0.03	Acsm3
67459	9.09	10.33	3.94	9.19	7.89	9.54	Nvl
17308	25.43	26.37	27.45	28.97	28.56	26.88	Mgat1
227210	21.1	24.19	15.1	24.15	20.99	23	Ccnyl1
103765	2.25	2.3	2.79	1.97	2	2.33	Tmem17
664799	0	0.04	0.02	0.03	0	0	Ctcfl
333048	0	0	0	0	0.01	0	Tmem211
55950	236.86	210.46	347.26	176.73	232.35	202.07	Bri3
71978	27.75	30.1	25.53	32.37	28.18	31.42	Ppp2r2a
72282	1.39	1.81	2.58	1.96	1.5	1.78	1810062G17Rik
60530	18.66	19.28	17.49	19.53	16.7	19.66	Fignl1
81489	30.94	33.03	29.7	34.77	32.08	34.66	Dnajb1
66447	83.37	71.44	107.53	73.22	87.86	75.93	Mgst3
21374	19.84	20.26	17.43	19.66	19.29	20.45	Tbp
381853	0.09	0.03	0.05	0.04	0.05	0.06	Gipr
19344	38.95	33.41	25.64	35.74	37.98	37.61	Rab5b
110012	15.7	14.73	19.66	13.61	15.22	13.85	Tpgs1
19273	0.45	0.39	0.15	0.25	0.28	0.25	Ptpru
240066	0.95	1.1	1.1	0.88	1.08	1.42	Zfp870
20224	48.26	49.15	47.71	50.12	49.35	52.1	Sar1a
109135	7.64	7.35	3.88	7.37	6.49	8.09	Plekha5
76478	16.52	17.94	20.56	17.75	16.04	16.24	Haus8
53901	9.02	7.69	6.03	6.43	8.12	8.05	Rcan2
66983	4.24	4.04	4.83	4.28	3.97	4.6	Zfp830
56318	0.01	0.02	0.04	0.02	0	0	Acpp
74174	0	0.15	0.22	0.08	0.15	0.07	Gtsf1
53609	12.96	10.86	11.8	11.19	11.84	12.67	Clasrp
224826	16.2	16.45	8.44	17.38	18.59	16.65	Ubr2
12492	17.01	17.32	12.86	15.16	15.84	15.5	Scarb2
12525	0.12	0.08	0.1	0.1	0.08	0.03	Cd8a
73692	5.14	5.4	1.77	5.53	5.29	5.33	2410089E03Rik
108737	14.76	16.01	12.2	16.44	14.45	15.81	Oxsr1
16512	0	0.01	0	0	0	0	Kcnh3
66617	25.54	30.35	38	31.32	30.34	30.39	Ntmt1
215476	2.63	2.59	1	2.43	2.33	2.32	Prr14l
194388	4.21	4.02	1.91	4.07	4.26	4.1	Tet3
27261	0.17	0.14	0.16	0.21	0.07	0.07	Dok3
330450	0.11	0.07	0.11	0	0.13	0.13	Far2
26570	0.69	0.9	0.42	0.74	0.58	0.69	Slc7a11
380712	1.46	1.79	1.77	1.33	1.35	1.21	Tlcd2
236219	0.22	0.08	0.17	0.12	0	0.06	Tcstv3
105440	9.37	10.46	7.29	10.84	10.26	12.02	Kctd9
195531	0.75	0.91	0.27	0.91	0.37	0.97	Gm13152
58226	0.03	0.02	0	0.01	0.01	0	Cacna1h
22652	0.16	0.1	0.21	0.12	0.2	0.06	Mkrn3
381259	8.51	9.28	11.1	8.15	8.02	8.59	Tmem237
66536	25.19	23.96	29.76	23.67	25.26	26.02	Nipsnap3b
50780	4.76	3.06	3.33	2.15	2.75	2.2	Rgs3
93876	0.04	0.05	0	0.07	0.04	0.03	Pcdhb5
15488	21.35	19.87	18.06	20.42	19.06	20.74	Hsd17b4
101055864	0.04	0.03	0.1	0.02	0	0	LOC101055864
213603	3.92	3.88	2.46	3.9	5.52	4.36	Slc44a3
210853	0.3	0.74	0.48	0.2	0.36	0.35	Zfp947
100764	6.49	7.02	5.23	6.46	6.84	7.32	Rita1
20446	0.69	0.51	0.34	0.15	0.63	0.33	St6galnac2
192113	0.03	0	0	0	0	0	Atp12a
229725	11.76	10.77	10.52	12.57	12.82	13.02	Clcc1
72318	2.9	2.56	1.17	1.61	2.19	1.82	Cyth4
18676	13.2	13.41	6.09	15.12	15.57	14.44	Phf2
22402	35.88	37.43	21.21	38.69	32.84	38.42	Wisp1
191578	5.2	5.44	6	6.02	4.81	6.07	Helq
238021	0	0	0.09	0.06	0	0	Fscn2
76854	0.02	0	0	0	0	0.04	Gper1
13848	19.15	15.3	8.42	15.81	22.85	18.58	Ephb6
102638882	0.15	0.09	0.03	0.03	0.12	0.1	Gm35339
319159	0.47	0.53	0.83	0.26	0.42	0.56	Hist1h4j
11722	0.22	0.31	0.15	0.24	0.09	0.18	Amy1
58994	141.4	139.91	84.9	132.27	132.44	127.94	Smpd3
19183	18.21	18.6	26.2	16.74	18.1	18.88	Psmc3ip
12362	0.14	0.2	0.23	0.03	0	0.1	Casp1
17301	0.81	0.53	0.46	0.43	0.47	0.5	Foxd2
58988	21.3	18	13.7	19.69	20.45	20.04	Rps6kb2
57908	2.49	1.83	0.66	2.03	2.31	2.54	Zfp318
216154	12.95	12.29	7.75	12.59	13.09	13.56	Med16
403187	25.33	25.63	11.57	29.76	29.21	31.03	Opa3
64435	0	0.01	0.01	0.01	0	0	Fcamr
67270	103.64	106.22	119.37	97.61	91.77	94.92	Mrpl42
108167320	3.36	2.28	5.71	4.4	2.58	3.53	LOC108167320
545975	0.08	0.02	0.02	0.05	0.03	0.03	Cers3
103694	40.21	39.38	35.71	40.62	41.83	41.1	Tmed4
21848	8.49	8.05	6.23	6.83	7.51	6.97	Trim24
18130	3.86	5.09	2.68	5.1	4.81	4.9	Ints6
105245	172.82	169.09	116.98	171.86	176.28	171.64	Txndc5
109342	0.05	0	0	0	0	0	Slc5a10
225895	18.55	18.59	20.48	17.59	19.45	18.71	Taf6l
13532	0	0	0	0	0	0.06	Usp17lc
71323	10.66	12.07	5.05	11.61	11.24	11.8	Rassf8
76055	12.51	13.67	8.68	13.06	13.17	13.45	Mgea5
27426	5.76	6.21	5.58	7.15	6.23	6.52	Nagpa
54672	0	0	0	0	0.02	0	Adgrg3
68961	21.88	21.08	29.41	24.02	21.7	22.25	Phkg2
101966	177.31	170.49	247	153.11	178.05	168.35	D8Ertd738e
68870	0.03	0	0	0	0	0.07	Ak8
17164	99.89	95.33	76.7	93.42	96.13	92	Mapkapk2
75641	0.79	0.13	0.64	0	0.26	0.26	1700029I15Rik
17344	13.05	11.7	6.98	13.52	12.75	13.9	Pias2
17977	1.53	1.56	0.72	1.69	1.5	1.42	Ncoa1
20491	0.06	0.04	0.04	0.04	0.02	0.06	Sla
21985	52.64	52.26	52.85	52.2	51.1	54.06	Tpd52
66679	35.86	41.62	42.98	45.29	36.99	41.42	Rae1
100042784	0	0	0	0.03	0.03	0	Prdm11
207495	0	0	0.03	0	0	0	Baiap2l2
80901	0.03	0	0	0.08	0	0	Cxcr6
101142	10.37	11.12	11.31	12.5	11.93	11.43	Itfg2
73689	23.79	26.48	42.16	25.37	26.45	28.25	Bloc1s2
20088	1606.06	1672.45	3358.22	1593.12	1528.54	1723.35	Rps24
15114	3.08	2.55	1.56	2.01	3.14	2.6	Hap1
227580	0	0.02	0	0	0	0	C1ql3
19376	63.47	65.48	76.75	66.09	63.54	63.87	Rab34
66162	103.15	104.37	255.43	95.77	103.32	103.15	Bola2
75782	0.81	0.82	0.56	0.88	0.76	0.79	Lca5
66877	10.69	10.78	9.69	10.38	11.46	13.25	Crnkl1
628779	0	0	0	0.02	0	0	Hs3st4
237082	5.13	5.05	3.47	5.03	4.45	5.7	Nxt2
98303	0	0.05	0	0	0	0	D630023F18Rik
223337	0	0.07	0.02	0	0.02	0.02	Ugt3a2
11898	2.01	1.83	2.31	2.06	2.08	2.42	Ass1
108169013	29.41	29.66	1.83	30.17	29.37	29.29	LOC108169013
22122	64.43	65.18	75.41	62.13	62.09	62.65	Tsta3
239796	8.57	8.59	6.86	8.23	7.57	8.17	Mb21d2
225997	0.04	0.08	0	0.04	0.09	0.06	Trpm6
216792	1.93	2.02	1.65	2.4	2.11	2.22	Iba57
50505	3.05	2.88	1.93	3	3.23	3	Ercc4
229279	119.9	126.34	107.42	122.58	117	129.39	Hnrnpa3
22340	60.79	60.15	66.2	61.48	63.55	58.57	Vegfb
271305	0.1	0.04	0.03	0.12	0.08	0.08	Phf21b
215707	27.79	25	18.35	27	28.76	26.01	Ccdc92
17076	0.43	0.58	0.13	0.52	0.53	0.62	Ly75
74125	5.18	5.84	4.82	5.14	5.09	5.05	Armc8
107976	46.67	42.62	45.54	45.34	48.07	44.48	Bre
18669	0.34	0.62	0.34	0.89	0.55	0.81	Abcb1b
56332	63.51	68.87	39.83	77.95	72.32	69.84	Amotl2
72309	1.46	1.47	1.55	1.71	1.15	1.03	Tmem158
12040	8.77	6.84	11.33	7.41	7.91	6.78	Bckdhb
381306	10.94	10.56	7.85	9.51	11.08	10.9	BC055324
30878	0	0.02	0	0.02	0	0.02	Apln
16470	0.1	0.03	0.05	0	0.07	0.05	Ush1g
68617	12.12	11.28	6.47	11.21	12.36	11.19	Mtcl1
66248	25.79	27.38	30.17	24.81	25.5	26.54	Alg5
71673	6.81	6.07	6.66	5.9	6.84	7.06	Rnf215
11973	87.87	91.75	112.83	86.59	82.34	84.79	Atp6v1e1
22709	2.07	2.23	1.87	1.55	1.52	1.65	Zfp51
20826	123.88	147.9	226.03	150.71	131.18	146.73	Nhp2l1
333789	1.31	1.48	0.7	1.1	1.12	1.29	N4bp2
108014	65.5	59.23	91.25	61.1	64.75	65.38	Srsf9
64294	47.53	41.22	44.22	39.81	47.27	43.31	Itm2c
51886	34.9	38.24	22.65	44.59	34.95	40.95	Fubp1
69752	21.1	24.28	34.04	25.49	22.21	23.01	Zfp511
227334	5.95	5.79	3.15	5.05	6.21	5.66	Usp40
68750	4.62	4.7	1.75	4.19	4.57	4.15	Rreb1
59290	0.07	0	0.02	0	0.04	0.02	Gpa33
231004	0.08	0.1	0.15	0.08	0	0.1	Samd11
18796	0	0	0	0	0.01	0	Plcb2
235505	4.39	4.81	2.52	4.97	5.2	4.62	Cd109
70235	20.38	17.2	20.16	18.78	20.59	19.23	Poc1a
74764	22.22	17.84	14.13	16.79	26.16	21.46	Klc4
226778	0	0.01	0	0	0	0.01	Mark1
74486	6.79	6.08	3.86	4.95	5.69	4.31	Osbpl10
67064	14.58	13.85	12.84	12.78	14.88	15.29	Chmp1b
329165	5.02	5.51	3.75	5.14	5.15	4.92	Abi2
236792	10.9	11.6	8.36	11.16	10.69	13.15	Mmgt1
67480	8.72	8.46	7.07	8.49	8.33	8.94	Cwc25
17907	3.09	3.33	5.37	2.72	3.74	2.47	Mylpf
68209	91.37	86.32	130.52	80.85	87.76	82.62	Rnaseh2c
211006	2.18	2	1.6	2.32	1.79	2.58	Sepsecs
433766	0	0.03	0	0	0	0	Trim63
12643	0.03	0	0	0.03	0.09	0.09	Chad
229320	0.02	0.02	0.02	0.07	0.07	0.11	Clrn1
19726	0.57	0.73	0.39	0.58	0.65	0.51	Rfx3
233204	15.36	13.66	15.62	14.59	15.4	12.44	Tbc1d17
231386	17.96	16.9	14.76	16.63	17.3	17.35	Ythdc1
58804	5.13	3.38	5.95	3.13	3.76	2.66	Cdc42ep5
19883	0.02	0.03	0.05	0.02	0.01	0.02	Rora
20733	0.04	0.08	0.04	0.04	0.04	0	Spint2
19386	6.37	6.72	2.75	7.02	5.94	7.18	Ranbp2
634731	0.05	0.04	0.05	0.03	0.01	0.03	Susd1
102636251	0	0	0.02	0	0.03	0	Gm33370
258571	138.33	135.68	77.92	101.65	105.42	101.15	Olfr1033
18194	37.45	35.9	24.83	38.19	37.76	35.09	Nsdhl
14673	49.72	44.36	16.19	44.48	45.45	40.84	Gna12
70081	1.29	1.21	0.89	0.93	0.85	1.22	2210404O09Rik
68889	25.35	25.33	24.71	24.01	24.71	23.09	Ubac2
16150	11.72	11.33	10	11.48	11.25	11.39	Ikbkb
52570	8.42	7.8	8.58	7.89	7.75	7.55	Ccdc69
434729	0	0	0.11	0	0.07	0	Fthl17f
66988	41.85	46.88	51.11	49.21	38.67	45.76	Lap3
15936	24.22	23.73	27.43	25.57	20.77	22.2	Ier2
14705	18.83	20.34	18.95	16.81	18.77	16.57	Bscl2
71971	10.15	9.72	7.72	12.34	11.45	11.36	Zswim1
66196	8.43	9.37	5.62	10.5	8.08	8.83	Myo19
78004	28.27	19.19	25.56	14.27	20.88	16.68	Prr15
225659	4.75	5.4	4.13	5.52	4.1	5.45	Cep76
24132	3.18	3.04	2.5	2.53	3.01	2.78	Zfp53
22276	4.14	4.16	4.77	3.59	4.16	3.83	Uros
74251	7.7	7.1	10.19	8.63	8.04	7.98	Ankrd9
69893	3.88	4.03	4.7	4.87	4.15	4.63	Coa7
216134	3.75	4.06	3.01	5.2	4.19	4.39	Pdxk
71238	5.64	5.47	6.97	3.24	4.51	4.2	Sdhaf3
408068	0.78	0.7	1.03	0.41	1.12	0.63	Zfp738
217304	0.04	0.08	0.08	0	0.02	0.02	Cd300lb
224619	56.09	54.22	37.65	57.68	58.61	56.61	Traf7
105245400	0.21	0.67	0.22	0.08	0	0.99	Gm40862
545288	0.04	0	0.07	0.03	0.06	0.09	Cyp2c67
84653	0.05	0.33	0.21	0.05	0.49	0.27	Hes7
328577	0.03	0.08	0	0	0.01	0	7530416G11Rik
13830	7.29	7.81	4.94	8.57	7.51	7.89	Stom
668208	0.03	0.04	0	0.05	0	0.03	Gm13288
14257	50.51	40.74	19.76	34.4	49.45	36.58	Flt4
74386	4.35	4.31	3.35	3.98	4.07	4.07	Rmi1
11877	1.42	1	1.13	1.04	1.41	1.2	Arvcf
17005	0.2	0.14	0.18	0.11	0.14	0.22	Ltk
545693	0.05	0.04	0.21	0.09	0.05	0.05	Gm13043
66262	4.97	5.29	3.67	5.62	5.21	5.16	Ing5
13214	0	0	0.05	0	0	0	Defb1
225872	0.02	0	0	0.01	0.01	0	Npas4
170460	16.44	14.24	13.59	12.13	15.42	12.93	Stard5
57432	1.03	2.23	2.24	2.27	1.88	2.03	Zc3h8
19171	36.18	36.54	71.18	36.22	40	34.78	Psmb10
234686	5.27	4.87	2.83	4.19	5.52	4.07	Fhod1
70823	12.06	10.82	9.44	8.89	9.71	10.15	Hmgxb4
66253	21.62	21.47	25.51	18.58	18.15	19.19	Aig1
231805	0.05	0.04	0.14	0.08	0.03	0.08	Pilra
20846	10.39	9.51	6.67	9.03	9.73	9.57	Stat1
56030	15.73	15.47	6.43	17.44	17.17	16.21	Tmem131
66126	97.22	94.73	137.66	99.36	98.23	102.05	Elof1
101055953	2.09	2.31	7.38	4.14	2.46	2.04	LOC101055953
56872	0.05	0	0.05	0	0	0.05	Pate4
81003	1.92	2.25	1.62	1.82	1.9	1.94	Trim23
193796	6.66	5.49	2.82	5.97	6.47	5.75	Kdm4b
11814	1.14	1.15	1.1	1.31	1.55	0.59	Apoc3
384214	0	0	0	0	0.05	0	Ephx4
18102	226.87	248.22	499.27	238.94	228.45	238.42	Nme1
56519	0.12	0	0	0	0	0	Defb4
106639	9.69	6.94	6.93	7.66	8.61	7.66	Vmac
66680	20.8	24.4	25.68	23.65	23.15	26.24	Oser1
320865	0.04	0	0	0	0	0	Cdh18
70750	9.66	8.73	6.85	8.83	10.29	11.1	Kdsr
71617	9.42	9.71	6.5	9.53	10.57	9.98	9130011E15Rik
19337	0.22	0.04	0.04	0.18	0.18	0.13	Rab33a
77015	0.76	0.76	0.63	0.17	0.34	0.19	Mpped2
66913	113.43	113.33	120.33	108.44	105.77	100.64	Kdelr2
23802	42.54	44.28	39.9	41.06	39.27	40.88	Amfr
67426	0.55	0.36	0.35	0.5	0.62	0.37	Adck3
50771	6.84	6.62	4.64	7.38	8.04	7.46	Atp9b
73410	0	0	0	0.12	0	0	1700065D16Rik
619297	0.04	0	0	0	0.03	0	C430049E01Rik
67811	65.64	66.7	58.24	67.62	65	68.09	Poldip2
227195	1.02	1.06	0.45	1.08	1	1.02	Ino80d
70396	18.03	19.24	21.25	18.88	16.26	19.84	Asnsd1
104360	0.94	0.96	0.83	0.61	0.51	0.55	Isl2
13199	0.07	0.04	0.01	0.04	0.05	0.05	Ddn
93679	60.6	56.67	42.2	58.37	59.87	56.91	Trim8
238690	0.22	0.2	0.28	0.26	0.27	0.22	Zfp458
16633	0.08	0	0.03	0	0	0	Klra2
20346	5.62	5.71	3.71	4.5	4.77	4.43	Sema3a
50850	6.65	7.22	6.51	7.18	6.88	7.25	Spast
83492	0.04	0	0	0	0	0	Gsdmc
76719	9.85	9.5	3.55	10.33	11.05	10.25	Kansl1
228368	22.13	20.44	14.97	19.29	20.74	18.87	Slc35c1
27176	1863.61	1923.25	2714.75	1997.83	1925.52	2007.71	Rpl7a
80893	0.02	0	0.02	0	0	0	Tmprss5
67493	18.92	23.25	19.53	25.3	20.64	23.76	Mettl16
238692	1.35	1.64	1.15	1.22	1.35	1.55	Zfp874a
432964	0.09	0	0.09	0.09	0.06	0.09	K230010J24Rik
269614	7.19	7.52	6.47	8.48	6.89	8.23	Pank4
102580	13.35	13.16	11.59	12.82	12.45	12.81	Alg9
67434	0	0.03	0	0	0	0	Ankrd33b
546611	0.05	0.03	0.06	0.03	0.02	0.02	Klhl33
66665	16.45	17.18	18.44	19.65	16.67	17.19	Msantd3
236511	3.09	3.45	1.39	3.11	2.96	3.01	Ago1
21808	9.9	9.16	5	9.13	9.72	8.61	Tgfb2
27993	29.49	31.31	29.38	38.11	32.39	34.46	Imp4
74229	0.4	0.24	0.2	0.25	0.27	0.23	Paqr8
217201	6.76	6.84	4.96	6.4	7.47	6.91	Rundc1
20686	2.04	2.19	3.47	1.9	3.34	2.58	Spa17
234564	0.03	0.11	0.03	0.05	0.16	0.03	Ces1f
218035	11.94	10.57	6.05	9.19	11.09	10.12	Vps41
20016	42.34	44.38	56.14	46.49	44.35	45.55	Polr1c
26403	40.89	34.73	28.07	38.27	41.15	37.33	Map3k11
75430	37.78	38.07	59.55	34.77	33.44	36.32	Anapc15
66612	16.42	16.97	14.31	16.22	16.64	16.72	Ormdl3
67213	10.17	9.5	6.92	9.49	10.43	10.07	Cmtm6
71564	0.17	0.28	0.18	0.47	0.39	0.16	Izumo4
19088	1.27	1.91	1.11	2.02	1.42	2.19	Prkar2b
268527	0	0	0	0	0	0.01	Greb1
63986	0.17	0.12	0	0.06	0.16	0.16	Gmfg
666532	3.9	3.93	3.17	3.44	2.87	3.48	Gm13139
212679	3.13	4.33	3	4.88	3.59	4.05	Mars2
228003	0.12	0.1	0.26	0.17	0.03	0.16	Klhl41
237761	0.03	0.01	0.01	0.01	0.04	0.03	Sowaha
208691	1.63	2.04	1.3	1.97	1.43	1.88	Eif5a2
78771	0.01	0	0.02	0	0	0.01	Mctp1
64656	47.56	54.75	80.08	51.76	51.03	51.36	Mrps23
19303	82.24	72.43	42.99	70.28	80.24	72.54	Pxn
226409	2.3	2.09	1.24	1.86	2.48	2.14	Zranb3
71810	50.57	49.81	44.75	55.48	51.78	51.44	Ranbp3
71310	0.35	0.27	0.17	0.31	0.37	0.3	Tbc1d9
319701	0.5	0.75	0.24	1.03	0.7	0.76	Fbxo48
74152	0.03	0.03	0.06	0.03	0.03	0.02	Stra6l
67416	0.17	0.23	0.21	0.05	0.2	0.15	Armcx2
16907	11.58	11.28	8.6	11.08	10.7	10.97	Lmnb2
75627	4.76	5.92	5.76	5.67	4.57	5.76	Snapc1
12166	14.54	14.5	9.15	14.39	13.11	14.82	Bmpr1a
54607	7.06	7.43	6.95	7.91	6.65	8.26	Socs6
108147	105.49	127.42	115.37	151.44	123.65	135.15	Atic
17961	2.2	2.25	2.27	1.47	1.99	1.69	Nat2
108052	0	0	0	0	0.01	0.03	Slc14a1
217593	0	0.05	0	0.02	0	0.05	Slc25a21
17193	3.46	3.76	1.86	2.99	2.97	3.53	Mbd4
18583	4.97	4.29	3.57	4.34	3.7	4.39	Pde7a
217869	32.97	39.46	37.93	41.61	32.82	40.36	Eif5
69698	0.08	0.08	0.12	0.1	0.1	0.04	Slc52a3
72658	3.09	3.13	6.26	3.38	3.81	2.4	2700097O09Rik
71835	4.15	3.88	3.18	3.63	3.63	3.78	Lancl2
72690	0	0	0	0	0	0.04	Grrp1
50721	9.57	10.46	6.5	9.86	10.55	10.44	Sirt6
16425	1.05	0.82	1.06	0.75	0.52	0.66	Itih2
105242930	0.01	0.01	0	0	0	0	Gm39002
242109	1.79	2.1	1.66	2.27	2	1.92	Zfp697
171543	3.51	3.25	1.74	2.57	3.84	2.81	Bmf
15170	0.72	0.98	0.83	1.06	0.88	0.6	Ptpn6
16876	0.25	0.21	0.15	0.2	0.24	0.31	Lhx9
73545	0.58	0.64	0.77	0.59	0.52	0.41	1700094D03Rik
69976	16.35	14.87	18.31	17.04	16.35	16.09	Galk2
20416	48.8	44.19	35.1	46.85	52.01	48.27	Shc1
217353	22.69	20.91	17.85	18.52	24.69	20.02	Tmc6
435921	0	0	0	0	0	0.08	Clec2f
231238	0.03	0.04	0	0	0.02	0	Sel1l3
100121	4.04	4.13	3.37	4.4	3.85	3.8	Tdrd7
11891	0.45	0.6	0.23	0.27	0.53	0.54	Rab27a
71562	9.87	8.58	6.38	8.67	9.51	8.86	Afmid
75305	0.03	0.06	0	0.06	0.03	0	Ankrd53
100039210	0.27	0.19	0.17	0.1	0.1	0.11	Gm2102
53325	11.68	12.02	9.95	11.95	11.17	11.76	Banp
20404	0.02	0	0	0.02	0.02	0.02	Sh3gl2
76982	0.02	0	0	0.02	0	0	3110035E14Rik
269855	0.81	0.68	0.15	0.54	0.51	0.54	Ssc5d
12322	0.01	0.03	0	0	0.03	0	Camk2a
14058	0.04	0.04	0.04	0.1	0.1	0.09	F10
19348	65.33	64.77	40.85	68.78	70.74	69.65	Kif20a
26358	0.75	0.59	0.61	0.67	0.9	0.53	Aldh1a7
195522	2.17	1.78	1.37	1.95	2.22	2.63	Zfp691
100042355	72.1	76.88	81.96	75.75	70.71	67.55	Gm10705
214575	0.03	0	0	0	0	0.02	Tdrd5
107734	101.52	108.87	154.38	98.81	101.39	112.09	Mrpl30
74734	0.01	0.01	0	0.01	0	0	Rhoh
67285	4.72	5.77	4.79	4.34	4.46	5.36	Cwc27
16668	622.65	629.52	860.88	628.23	617.5	615.8	Krt18
59036	0.03	0.07	0.05	0.04	0.01	0.03	Dact1
217082	0.1	0.06	0.02	0.05	0.06	0.04	Hlf
68184	56.48	59.9	81.39	61.12	55.37	64.67	Denr
214254	1.21	1.17	0.79	1.3	1.14	1.35	Nudt15
237890	0.06	0	0	0	0.06	0	Slfn14
76843	10.73	11.3	7.37	11.09	10.23	11.8	Dtl
20335	61.68	65.5	132.13	51.29	57.63	54.91	Sec61g
330671	0	0	0	0.02	0	0	B4galnt4
101055951	0	0.49	0	0	0	0.07	LOC101055951
240058	0.03	0.1	0.07	0.15	0.07	0.09	Cpne5
434866	0	0.11	0	0	0	0	Gm15127
252837	1.06	0.57	0.43	0.12	0.27	0.12	Ackr4
241201	0.02	0.03	0.02	0.05	0.02	0	Cdh7
58234	0.01	0	0	0.01	0.01	0.01	Shank3
12330	114.28	123.67	83.39	119.62	117.21	123.08	Canx
18538	296.49	320.72	444.8	311.43	286.25	321.9	Pcna
622402	0.06	0.14	0.12	0.07	0.2	0	Akr1c12
66549	7.59	8.27	6.12	7.95	7.93	8.01	Aggf1
193116	9.9	10.23	8.87	9.8	10.19	10.68	Slu7
55949	307.44	334.27	524.41	306.79	319.87	319.51	Eef1b2
103742	56.87	54.64	81.75	48.3	55.21	46.46	Mien1
20755	3.7	0	3.54	0.99	1.37	1.25	Sprr2a1
102635744	0	0	0	0.03	0	0	Gm28729
16848	30.27	27.27	31.89	30.97	32.32	29.57	Lfng
66205	0.16	0	0.11	0	0.08	0.08	Cd302
100855	8.37	9.16	5.91	8.66	8.37	9.4	Tbc1d14
20454	65.31	64.02	48.78	64.19	67.83	68.31	St3gal5
209011	16.82	15.18	16.29	14.67	14.54	15.25	Sirt7
12408	0.93	0.73	1.27	0.97	0.63	1.1	Cbr1
23918	137.36	150.91	173.77	156.6	139.58	150.91	Impdh2
59031	58.09	50.92	51.55	48.83	54.04	47.96	Chst12
269252	7.67	8.13	4.45	9.47	7.85	8.67	Gtf3c4
80289	4.05	4.56	2.21	4.12	3.58	4.79	Lysmd3
433801	1.22	1.27	1	0.93	0.76	1.02	Gm13212
218314	0.39	0.55	0.32	0.53	0.67	0.71	Zfp595
278240	0.32	0.67	0.38	0.12	0.27	0.19	Spin2c
208092	55.59	52.27	58.41	52.38	57.15	53.17	Chmp6
52639	7.39	7.14	4.6	7.8	7.77	7.69	Wipi1
98956	15.07	18.95	12.69	23.12	17.31	20.07	Nat10
12325	8.63	8.43	5.78	8.77	8.45	8.17	Camk2g
12518	0	0	0.04	0.08	0.04	0.04	Cd79a
213945	0.01	0.01	0.01	0	0	0.01	Col28a1
329251	3.58	4.04	1.88	5.28	3.86	4.84	Ppp1r12b
67097	2415.43	2369.5	4122.12	2425.35	2416.04	2327.09	Rps10
270802	4.13	4.57	2.58	4.01	3.93	3.9	BC048403
228858	0.02	0	0.02	0	0.04	0.02	Gdap1l1
105242927	0.06	0.07	0.03	0	0.03	0	Gm38999
57439	21.28	23.26	25.39	23.84	19.84	23.59	Tmem183a
225131	14.84	15.85	10.34	15.56	15.16	15.57	Wac
67042	37.2	33.92	37.96	32.63	37.63	36.97	Ift27
52712	4.73	4.32	3.87	5.18	5.36	4.42	Zkscan6
70348	1.59	2.2	2.6	1.86	1.46	2.13	Ube2cbp
233424	0.04	0.04	0.03	0.04	0.06	0.03	Tmc3
68521	10.29	8.88	6.98	10.49	11.11	9.21	Fam189b
76539	7.13	7.05	9.25	6.73	6.77	6.43	Fam204a
270150	0	0	0	0.03	0.04	0	Ccdc153
71711	10.68	9.94	10.07	9.7	10.41	9.73	Mus81
14712	23.29	22.82	16.76	20.38	20.86	19.98	Gnpat
78774	0	0.1	0.03	0	0.03	0	Cfap61
227731	2.71	4.18	3.26	4.97	3.75	4.47	Slc25a25
66302	1.38	0.97	1.12	1.04	0.96	0.93	Rmdn1
22349	0.02	0.02	0	0.02	0	0.02	Vil1
104732	9.17	9.25	6.86	8.76	9.83	9.78	4930427A07Rik
80292	6.81	6.19	4.32	5.92	6.63	6.21	Zxdc
56316	9.72	10.06	6.8	8.08	9.13	7.75	Ggcx
18707	0.46	0.46	0.3	0.68	0.61	0.47	Pik3cd
108755	4.35	4.83	5.85	3.87	4.73	4.14	Lyrm2
102436	5.63	5.31	3.62	5.32	5.51	5.63	Lars2
17087	4.75	3.7	7.79	4.99	4.62	4.25	Ly96
110119	17.9	18.13	20.42	17.72	19.25	17.14	Mpi
76615	0.04	0	0	0	0	0.04	Got1l1
215445	9.05	8.88	6.23	8.92	10.05	8.92	Rab11fip3
56708	30.33	30.21	25.84	31.03	27.08	29.02	Clcf1
26568	1.11	0.66	0.74	0.65	0.71	0.66	Slc27a3
75725	7.08	7.74	7.27	6.37	6.51	6.99	Phf14
66999	12.1	12.35	21.73	11.9	13.33	12.73	Med28
72930	5.2	4.98	3.98	4	5.25	4.47	Ppp2r2b
12385	104.51	101.5	85.17	106.42	109.88	108.99	Ctnna1
14768	6.05	5.58	6.55	5.47	6.38	6.04	Lancl1
27643	14.95	15.27	16.09	16.51	13.9	15.89	Ubl4a
19054	4.59	4.47	4.75	4.4	4.58	4.56	Ppp2r3d
100861908	0.07	0.07	0.03	0.06	0.08	0.22	Gm21319
73341	0.33	0.21	0.06	0.23	0.11	0.16	Arhgef6
19655	31.19	31.09	28.62	36.97	34.76	37.43	Rbmx
15007	0.22	0.3	0.43	0.32	0.25	0.27	H2-Q10
12295	3.25	2.3	2	2.15	2.53	2.35	Cacnb1
75124	0.29	0.05	0.11	0.14	0.05	0.24	Nxnl2
67511	90.08	91.45	101.12	89.93	94.86	93.21	Tmed9
353208	0.15	0.56	0.33	0.03	0.6	0.48	Zfp931
78255	12.52	12.75	10.57	12.89	11.96	12.43	Ralgps2
211556	35	40.51	31.69	42.57	34.11	40.72	Ap1ar
233912	5.56	5.51	4.5	5.4	6.05	5.17	Armc5
243743	7.96	6	1.82	4.72	7.62	5.34	Plxna4
100041599	0	0	0	0.08	0	0	LOC100041599
231807	8.43	8.98	6.28	9.41	9	8.94	BC037034
16206	8.29	9.47	5.89	11.02	7.63	9.79	Lrig1
75007	31.22	29.2	33.92	29.19	33.16	31.34	Fam63a
18700	4.12	4.9	3.56	4.87	3.78	4.43	Piga
330695	13.53	8.98	9.68	9.13	9.6	9.86	Ctxn1
237886	4.19	4.1	1.72	3.15	3.31	3.01	Slfn9
319604	20.68	19.92	8.11	20.47	21.08	20	Fam168a
68349	88.18	83.73	151.74	84.94	89.45	87.05	Ndufs3
78388	30.71	30.02	25.87	28.98	32.33	29.59	Mvp
192194	0	0	0	0.02	0.01	0	Btnl10
83436	12.93	12.34	10.53	12.9	12.07	12.04	Plekha2
14235	82.98	79.81	43.07	87.68	81.54	83.72	Foxm1
66091	176.91	154.14	353.69	147.19	162.64	168.69	Ndufa3
652925	13.43	12.26	17.9	10.93	12.26	12.81	Tmem243
12349	0.09	0.06	0.06	0.09	0.09	0	Car2
14126	0.02	0	0.02	0.02	0	0	Ms4a2
211652	36.52	39.15	17.88	44.75	40.37	41.71	Wwc1
16508	0.48	0.35	0.09	0.13	0.26	0.11	Kcnd2
26459	0.18	0	0.19	0.04	0.09	0.02	Slc27a5
68729	8.64	9	6.98	9.78	9.12	9.47	Trim37
70207	9.61	10.24	10.39	11.55	10.16	11.2	Taco1
19153	1.95	1.77	1.08	2.05	1.55	2.08	Prx
382018	0.15	0.13	0.14	0.19	0.17	0.12	Unc13a
243385	0.86	0.65	0.3	0.7	0.82	0.82	Gprin3
170759	26.14	25.62	14.53	24.19	24.99	22.26	Atp13a1
210146	5.2	4.55	2.6	4.9	4.98	4.54	Irgq
18613	0.31	0.15	0.17	0.13	0.25	0.18	Pecam1
67778	8.35	7.94	9.12	6.87	6.3	6.75	Zfp639
67971	0.46	0.31	0.4	0.3	0.55	0.37	Tppp3
54188	17.94	17.99	20.46	19.4	17.83	18.82	Cpsf4
18286	17.74	16.96	9.79	20.18	20.29	18.91	Odf2
22092	0.77	1.18	0.74	0.45	0.76	1.2	Rsph1
20318	65.29	67.95	59.38	62.66	68.47	70.6	Sdf4
380842	0	0	0.04	0	0	0	Stmnd1
269701	0.01	0	0.01	0.02	0.02	0	Wdr66
52432	25.97	25.26	27.73	26.09	24.17	26.51	Ppp2r2d
19762	0	0	0.05	0	0	0	Rit2
68327	23.93	22.12	41.02	26.56	25.76	24.13	Tsr3
232210	21.31	23.19	26.07	22.16	22.12	20.85	Hmces
100503041	0.44	0.33	0.17	0.38	0.56	0.39	Pdzd7
20530	6.93	7.04	4.67	6.68	6.78	7.36	Slc31a2
22215	4.9	5.03	3.71	5.22	4.32	4.96	Ube3a
243853	13.54	13.73	8.8	13.99	13.96	11.59	Fkrp
20479	17.78	18.31	15.01	17.4	17.89	20.66	Vps4b
16551	27.46	28.61	16.66	27.7	27.34	29.79	Kif11
66624	115.84	117.41	165.66	108.83	112.38	117.21	Spcs2
100503884	3.45	3.46	2.45	3.83	3.88	3.89	Ccdc149
21652	8.75	7.53	6.67	7.35	8.85	7.93	Phf1
53623	0.04	0.06	0.04	0	0	0	Gria3
72611	5.43	6.03	4.59	4.2	5.15	5.56	Zfp655
98396	4.08	4.34	2.18	4.51	4.45	4.17	Slc41a1
76426	0.25	0	0.08	0.08	0.08	0.08	Fam209
21400	0.77	0.59	0.78	0.65	1.21	0.58	Tcea2
110382	0.03	0	0.02	0.03	0	0.05	C8b
26386	5.89	4.54	6.53	4.11	4.29	4.26	Hsf4
110058	0.08	0.03	0	0.02	0	0.02	Syt17
14539	0	0	0.08	0.04	0.04	0	Opn1mw
108030	0.02	0.01	0.02	0.02	0	0	Lin7a
16578	0.22	0.1	0.05	0.09	0.13	0.07	Kif9
72543	13.28	14.5	7.23	16.38	15.51	16.81	Mvb12b
230082	48.89	53.49	34.21	67.52	57.38	58.07	Nol6
19204	0.01	0.04	0.03	0.03	0	0.04	Ptafr
50528	0.02	0	0.02	0	0	0	Tmprss2
93759	1.42	1.39	1	1.18	1.1	1.12	Sirt1
16881	64	60.21	49.04	59.46	66.59	62.8	Lig1
218165	0	0	0.02	0	0	0	Ofcc1
70726	0.26	0.29	0.42	0.25	0.16	0.13	Angptl6
71787	32.38	31.17	51.81	31.44	29.42	32.66	Trnau1ap
434130	0.03	0	0	0.02	0	0.02	Ccdc8
56805	3.38	3.43	1.74	3.29	2.93	3.08	Zbtb33
22612	5.52	5.75	3.83	4.56	4.93	4.94	Yes1
50791	0.19	0.13	0.14	0.16	0.25	0.22	Magi2
50935	36.68	31.68	27.99	36.07	40.13	37.85	St6galnac6
229861	0	0	0	0	0	0.1	Gm567
77766	2.68	2.68	2.68	2.93	2.67	2.72	Elp4
234366	62.07	61.99	40.7	65.56	62.48	58.35	Gatad2a
67871	17.38	17.35	18.89	17.94	15.78	17.87	Mrrf
96935	0.03	0.02	0.02	0.03	0.02	0	Susd4
194401	7.76	7.24	3.1	6.65	6.93	6.12	Mical3
52443	46.35	45.72	67.31	40.66	40.87	43.39	Mrpl48
105000	1.46	1.75	0.84	1.94	1.86	1.98	Dnal1
17175	0.14	0.07	0.02	0.07	0.07	0.17	Masp2
67163	23.46	25.01	20.9	24.8	23.16	24.76	Ccdc47
77219	6.79	5.8	4.41	6.18	6.84	6.72	Ptgr2
109624	169.23	170.07	112.76	164.3	156.86	169.04	Cald1
269952	2.26	2.29	1.77	2.22	2.22	2.15	Gdpgp1
240960	0.01	0	0	0	0	0	Dnah14
320683	1.22	1.15	0.73	0.98	1.09	0.87	Zfp629
12662	2.32	2.56	1.08	2.05	2.43	2.73	Chm
26425	31.07	31.92	33.58	29.72	34.26	31	Nubp1
12350	0.24	0.31	0.49	0.27	0.1	0.17	Car3
218885	12.27	10.31	10.12	9.67	10.96	9.91	Oxnad1
11949	294.91	297.9	406.94	318.03	304.04	306.34	Atp5c1
100101919	0.01	0.05	0.04	0.01	0.02	0.02	Dnah7c
56857	0.14	0.18	0.08	0.16	0.23	0.12	Slc37a2
70556	11.37	11.77	17.36	12.02	10.61	11.09	Slc25a33
94175	0.27	0.15	0.09	0.12	0.12	0.26	Hrg
11747	386.61	384.84	462.27	428.09	424.95	442.09	Anxa5
73834	35.44	35.11	44.68	33.67	31.4	33.52	Atp6v1d
76803	0.03	0	0	0	0	0.03	2410141K09Rik
15896	0	0	0.04	0	0	0	Icam2
69232	23.59	25.16	19.57	26.1	24.47	25.76	Qrich1
102642386	0	0.12	0.09	0.08	0.06	0.15	LOC102642386
244745	13.37	13.34	10.32	13.18	12.91	13.28	Dpy19l1
634882	0	0.02	0	0	0.01	0	Itih5l-ps
18201	38.06	35.06	21.06	36.74	38.5	37.75	Nsmaf
433904	1.67	1.81	2.07	1.58	1.59	1.67	Ociad2
75471	0.08	0.12	0.16	0.08	0	0.04	1700009N14Rik
21973	88.41	86.47	54.85	91.6	92.49	99.51	Top2a
110834	0	0	0.02	0	0.02	0	Chrna3
230757	3.7	3.54	2.76	3.83	3.84	4.05	5730409E04Rik
56223	0.03	0.03	0.03	0.05	0.06	0.03	Fscn3
12986	0.12	0.2	0.21	0.16	0.05	0.37	Csf3r
224481	7.92	8.24	7.71	7.93	7.98	8.29	Tfb1m
14432	0	0	0.04	0	0	0	Gap43
434377	1.11	1.09	1.68	0.86	1.03	1.13	Zfp560
231915	10.92	11.24	10.82	12.8	10.95	12.81	Uspl1
77604	2.53	3.5	1.88	3.15	2.95	2.88	Rbm12b2
228033	439.4	481.39	733.34	430.65	417.9	403.82	Atp5g3
231042	5.57	5.99	4.86	6.31	5.38	6.37	Nupl2
12775	1.29	1.16	0.75	0.78	0.86	0.65	Ccr7
74004	0	0	0.01	0.01	0.01	0	Jakmip3
18813	190.29	216.09	203.86	238.92	193.91	215	Pa2g4
245368	0.23	0.13	0.05	0.06	0.11	0.09	Zfp300
225631	0.16	0.12	0.08	0.1	0.11	0.1	Onecut2
320145	0.44	0.5	0.44	0.23	0.25	0.36	Sp8
14964	72.39	73.02	86.68	73.42	71.65	69.81	H2-D1
80859	2.42	2.37	2.38	1.96	1.9	1.75	Nfkbiz
108169096	0.05	0	0	0.1	0	0.14	LOC108169096
117589	2.47	2.09	1.47	1.76	2.24	2.45	Asb7
108167986	1.64	1.3	0.96	0.61	1.17	1.23	LOC108167986
107508	39.62	43.63	42.46	41.5	35.81	41.6	Eprs
69053	7.04	7	5.41	6.83	6.76	7.58	1810013L24Rik
107568	2.55	2.64	1.48	2.53	2.29	3.05	Wwp1
18458	1109.13	1139.7	748.58	1224.41	1072.88	1094.6	Pabpc1
19158	38.82	37.16	40.82	33.25	36.92	35.58	Cyth2
75329	0.01	0	0	0.02	0	0	Atf7ip2
217845	0.08	0	0.05	0	0.08	0.05	Ifi27l2b
217449	11.22	10.83	6.82	10.9	12.01	10.61	Trappc12
14009	0	0	0.02	0.07	0.02	0.01	Etv1
69550	34.67	30.48	62.1	20.76	25.3	23.7	Bst2
11980	1.5	1.56	0.99	1.92	1.76	1.96	Atp8a1
72795	4.26	3.65	2.76	3.81	4.35	4.31	Ttc19
68035	82.61	77.12	93.88	79.68	81.63	76.42	Rbm42
20762	0.43	0.5	0.48	0.21	0.21	0.28	Sprr2h
667063	0	0	0.13	0	0.13	0	Gm8439
57296	161.58	164.21	212.02	156.39	145.62	159.06	Psmd8
79401	0.03	0	0	0	0	0	Spz1
258783	0	0	0	0.05	0	0	Olfr920
71704	0.97	1.47	0.79	1.74	1.27	1.64	Arhgef3
110173	13.86	13.44	9.84	13.98	14.99	14.79	Manba
72236	0.05	0	0	0	0.05	0.05	Tsnaxip1
414077	125.11	120.48	213.96	111.21	117.35	108.72	Wdr83os
140577	0.01	0	0	0	0.03	0	Ankrd6
100862375	7.17	7.73	1.98	7.68	5.56	6.5	Gm21685
232975	0.11	0.04	0.07	0.06	0.14	0.1	Atp1a3
69710	3.42	3.53	3.26	3.06	3.82	3.67	Arap1
209200	2.76	2.65	1.18	2.46	2.85	2.55	Dtx3l
244209	0.02	0.04	0	0	0.02	0.02	Cyp2r1
19219	0.69	0.29	0.26	0.36	0.37	0.34	Ptger4
78890	4.04	4.02	2.97	4.53	4.19	4.14	Trmt44
16178	0.05	0	0	0	0	0	Il1r2
14864	0	0	0	0.05	0	0.08	Gstm3
69640	2.1	2.54	1.41	2.69	2.57	2.69	Fam83g
213649	4.14	2.98	1.85	2.87	3.66	3.02	Arhgef19
18175	0	0	0.01	0.01	0	0.03	Nrap
74330	22.84	21.95	16.51	22.42	23.9	23.41	Dnajc14
102634941	0.95	0.62	1.19	0.55	0.72	0.64	Gm29376
240087	17.63	16.69	6.73	16.12	18.27	16.29	Mdc1
320311	0.01	0	0.01	0.01	0.01	0	Rnf152
57339	0	0	0.01	0	0	0	Jph1
71853	166.44	161.94	197.4	152.66	160.68	161.51	Pdia6
21959	0	0	0	0.07	0	0	Tnp2
102334	10.65	10.79	11.21	11.36	11.27	12.78	Ankrd10
107607	28.43	26.88	16.13	25.08	27.7	24.4	Nod1
52504	3.81	3.66	3.01	4.23	4.32	4.11	Cenpo
69387	0.16	0.05	0	0	0	0	Dnajb13
56401	18.8	16.23	11.89	15.88	18.45	16.68	P3h1
74157	19.57	20.35	10.88	22.58	21.3	21.58	Cmtr1
20680	0	0.02	0	0	0	0.03	Sox7
20111	36.43	31.69	19.37	32.86	36.21	32.53	Rps6ka1
218734	1.66	1.34	1.21	1.09	1.24	1.19	3830406C13Rik
100182	0.2	0.09	0.04	0.06	0.09	0.12	Akna
20955	7.63	6.69	7.79	6.28	6.73	8.03	Vamp7
68554	13.13	11.8	22.14	11.05	10.39	12.45	Cebpzos
19698	13.42	14.16	15.73	14	12.31	14.35	Relb
99681	0	0	0	0	0	0.01	Tchh
224019	0.28	0.11	0.17	0.21	0.14	0.11	Tmem191c
66337	0.52	0.49	1.69	0.44	0.51	0.8	Fam229b
54366	12.76	12.66	8.92	14.11	14.47	15.13	Ctnnal1
228807	2.25	2.2	0.98	2.58	2.02	1.97	Zfp341
20833	140.06	151.94	99.2	166.95	146.26	166.05	Ssrp1
19942	1465.81	1539.43	2509.27	1342.62	1403.66	1407.06	Rpl27
93706	42.67	38.88	20.56	41.39	46.17	41.48	Pcdhgc3
54354	2.02	2.12	1.31	2.02	1.48	1.64	Rassf5
109161	14.79	15.9	11.42	14.42	13.2	13.8	Ube2q2
12686	0.03	0	0	0.04	0	0.05	Elovl3
73847	22.75	21.84	27.29	23.15	25.91	24.45	Fam110a
327655	2.02	1.94	1.32	1.95	2.37	2.03	Ppip5k1
68431	7.33	6.46	9.43	7.51	7.77	6.97	Fbxl15
320522	0	0.04	0	0	0.04	0	Bhlha9
56635	0	0	0	0	0.06	0	Prl2a1
113847	0.15	0.05	0	0	0	0	Vmn1r43
74466	0	0	0.04	0.06	0.06	0.08	4933427G17Rik
381199	58.28	45.13	31.54	47.21	62.25	48.69	Tmem151a
109093	6.95	7.87	7.73	7.15	7.52	7.91	Rars2
20788	90.51	85.11	40.88	96.46	101.37	93.18	Srebf2
18624	27.48	26.05	29.57	26.5	29.55	26.52	Pepd
20476	0	0	0	0	0	0.01	Six6
14827	377.16	370.51	421.18	386.06	390.36	401.93	Pdia3
100328588	0.89	0.61	0.45	0.95	0.8	0.73	Gm21948
56613	85.32	88.83	83.61	87.62	83.2	86.63	Rps6ka4
140486	8.46	8.16	6	8.77	8.98	9.03	Igf2bp1
76654	0.12	0.09	0.23	0.21	0.1	0.12	Upp2
330503	0.63	0.9	0.18	0.7	0.73	0.56	Gm5113
68616	0.54	0.64	0.47	0.58	0.29	0.67	Gdpd3
74043	4.16	4.08	3.19	3.5	3.71	3.22	Pex26
140570	150.75	148.99	71.86	156.3	161.05	150.07	Plxnb2
19243	18.37	21	20.72	23.2	19.05	22.04	Ptp4a1
269338	9.78	9.89	6.62	10.77	11.63	11.07	Vps39
101544	0.03	0.04	0.05	0.06	0.04	0.11	Zfp575
17329	0.03	0.05	0	0.03	0.05	0.09	Cxcl9
98910	17.53	18.4	8.63	21.12	19.1	20.95	Usp6nl
54615	0.25	0.25	0.12	0.49	0	0.24	Npff
76832	7.24	7.44	8.27	8.11	7.64	7.56	Hyls1
69938	20.85	19.1	18.37	17.03	19.53	18	Scrn1
21749	10.17	10.3	10.28	11.02	10.62	11.2	Terf1
109294	12.09	16.14	14.23	11.79	11.03	8.64	Prex2
24063	1.5	1.78	2.05	1.97	1.68	1.6	Spry1
229503	4.37	4.17	3.7	4.76	4.1	4.34	Rrnad1
12479	0.93	0.79	0.89	0.61	0.83	0.58	Cd1d1
20353	7.69	7.14	3.8	6.26	7.12	6.6	Sema4c
320747	0.02	0	0	0	0	0	Lingo4
244049	0.02	0.01	0.03	0	0.03	0.05	Mctp2
76238	44.14	39.94	44.86	37.16	41.57	37.72	Grhpr
108168155	0.12	0	0	0	0	0	LOC108168155
321007	1.22	1.21	0.78	1.22	0.87	1.24	Serac1
94067	81.67	86.64	119.65	76.24	77.82	76.42	Mrpl43
81601	29.71	29.75	27.7	28.86	27.16	27.81	Kat5
16971	17.86	13.49	4.55	12.69	20.15	13.36	Lrp1
28010	20.27	18.16	20.32	18.48	20.4	21.71	Miip
64930	3	3.05	1.38	3.45	3.5	3.44	Tsc1
69731	62.81	58.85	88.11	57.89	60.05	57.72	Gemin7
26399	1.63	1.6	0.92	1.08	1.1	1.39	Map2k6
623279	0.11	0.11	0.05	0.11	0.21	0.21	Dok6
114615	1.36	1.25	0.89	1.33	1.33	1.24	Elac1
72198	15.19	18.56	11.17	16.97	14.23	20.37	Skiv2l2
75690	0.33	0.36	0.19	0.35	0.31	0.26	Vsig10l
68944	11.48	12.92	15.19	11.37	10.58	11.27	Tmco1
232875	0.01	0	0.01	0.02	0.02	0.03	Zscan18
17766	20.18	20.22	36.36	16.34	21.42	18.46	Nudt1
19876	0.48	0.43	0.2	0.34	0.39	0.31	Robo1
57265	13.65	12.12	10.7	13.09	13.02	13.17	Fzd2
107746	34.6	38.83	21.11	47.84	42.09	45.04	Rapgef1
269788	0.01	0.01	0	0	0.01	0	Lhfpl4
320640	0.1	0.14	0.06	0.11	0.08	0.1	Skint4
235636	0.02	0.06	0.02	0.04	0.17	0.08	Rtp3
54380	7.4	7.32	4.05	7.89	8.29	8.15	Smarcal1
319176	0.24	1.16	0.62	1.39	0.6	0.22	Hist2h2ac
78803	0	0.01	0.01	0.03	0.03	0.04	Fbxo43
232946	8.15	7.42	8.8	7.23	7.56	8.22	Bloc1s3
68938	40.19	38.28	47.26	37.1	42.78	38.35	Aspscr1
105246904	3.6	3.93	0.37	3.61	4.43	5.12	Gm42102
14227	174.12	150.9	313.86	142.48	159.77	152.43	Fkbp2
66410	9.62	9	12.82	11.39	10.81	11.41	Mterf3
14168	31.61	36.02	33.32	38.6	32.36	34.57	Fgf13
65079	0.03	0	0	0.03	0	0.03	Rtn4r
23917	28.12	32.19	28.17	34.88	32.17	32.74	Impdh1
100041708	0	0.04	0	0	0	0	LOC100041708
14380	0.07	0	0	0	0	0	G6pd2
98985	7.34	7.06	8.42	7.38	6.43	7.75	Clp1
21950	8.73	8.66	9.12	8.13	8.6	7.56	Tnfsf9
67111	5.21	3.94	4.21	4.52	5.08	3.78	Naaa
18996	0	0	0	0	0	0.01	Pou4f1
229096	10.09	10.53	6.05	9.92	9.64	10.34	Ythdf3
14924	2.88	2.41	1.54	2.45	2.45	2.16	Magi1
12709	1.2	1.24	1.67	1.02	1.29	1.04	Ckb
68235	2.17	2.08	1.02	2.01	2.37	1.93	Mturn
23874	45.74	51.56	43.26	58.67	50.46	54.47	Farsb
102643210	0.02	0.09	0.05	0.04	0.07	0.04	Gm38664
19271	7.26	6.51	3.28	6.98	7.66	6.82	Ptprj
432628	0.54	0.4	0.35	0.38	0.46	0.28	Mfsd2b
66500	10.44	10.31	4.82	10.94	9.99	12.4	Slc30a7
69072	20.41	22.89	32.66	24.86	20.06	24.35	Ebna1bp2
235135	0.55	0.38	0.36	0.33	0.46	0.72	Tmem45b
66459	4.01	4.1	5.92	3.82	3.65	3.74	Pyurf
17314	41.92	34.87	57.31	33.78	37.31	33.65	Mgmt
232078	0.51	0.28	0.37	0.23	0.32	0.43	Thnsl2
54357	19.01	15.4	10.93	11.65	17	13.39	Epb41l4b
328092	7.97	8.32	10.1	7.8	8.39	8.07	Dtd2
100216455	0.09	0.02	0.06	0.05	0.04	0.06	Gm14124
12313	117.61	120.56	120.86	114.61	105.52	114.98	Calm1
13016	100.81	102.33	113.84	96.73	98.73	99.69	Ctbp1
12539	144.68	143.23	164.85	138.37	145.28	151.55	Cdc37
216805	8.23	9.41	6.89	8.78	7.77	8	Flcn
12934	3.2	2.68	2.72	2.34	2.79	2.69	Dpysl2
28028	12.64	14.41	18.71	15.32	14	15.78	Mrpl50
50798	11.2	11.25	7.89	12.61	11.4	11.43	Gne
93887	0.07	0.04	0.05	0.03	0.04	0.06	Pcdhb16
109151	1.58	1.46	0.43	1.47	1.28	1.46	Chd9
107526	0	0.04	0	0	0	0	Gimap4
54402	17.56	18.05	24.9	20.46	19.91	18.35	Stk19
50917	7.11	6.5	4.68	5.83	6.83	6.75	Galns
11853	285.01	274.33	352.93	296.47	316.83	312.82	Rhoc
545817	0.01	0	0	0	0.01	0.03	Cyp2w1
68198	90.48	93.02	165.3	79.35	89.31	77.02	Ndufb2
18646	0	0.02	0	0.05	0	0	Prf1
110593	7.11	6.64	3.95	7.42	6.83	7.18	Prdm2
75141	0	0	0	0	0	0.02	Rasd2
23796	0.04	0	0.01	0.01	0.03	0.04	Aplnr
99887	0.2	0.25	0.09	0.03	0.11	0.21	Tmem56
94213	13.9	14.1	13.31	12.23	12.35	14.19	Ddx50
109934	15.44	15.86	9.47	15.42	16.27	15.58	Abr
110326	0.04	0	0.06	0.02	0.1	0.04	Tas1r1
242506	0	0	0	0.01	0	0	Frmd3
12006	0.24	0.14	0.06	0.14	0.1	0.06	Axin2
65107	74.58	68.34	48.36	67.6	75.14	65.91	Lrp10
668166	2.61	2.43	2.28	3.29	3.05	3.04	Zxdb
20364	36.02	36.59	76.37	41.32	36.7	34.02	Sepw1
22592	3.92	4.52	3.15	4.54	4.75	4.97	Ercc5
51793	18.06	15.3	23.92	13.32	19.28	15.83	Ddah2
53625	10.18	9.31	8.11	10.77	10.92	9.91	B3gnt2
72745	2.91	3.13	2.98	2.22	2.16	3	Tmem161b
219024	26.44	27.1	27.63	27.31	27.29	27.54	Tmem55b
20526	0.04	0.02	0.08	0.06	0.04	0.02	Slc2a2
74349	2.1	2.38	1.34	2.44	2.58	2.49	Fam160a2
75801	0.02	0	0	0	0	0	4930447C04Rik
105244808	0.05	0.09	0	0	0	0	Gm40353
15024	0.17	0.24	0.25	0.48	0.46	0.19	H2-T10
20818	38.54	38.95	34.62	39.97	38.25	38.83	Srprb
70028	1.98	1.5	0.78	1.66	2.43	1.69	Dopey2
19730	1.74	1.46	0.88	1.27	1.54	1.12	Ralgds
192140	0.02	0.01	0	0.03	0.02	0	Tmc2
234852	54.08	56.17	55.98	56.93	57.93	52.01	Chmp1a
108168203	0.01	0	0	0	0	0	LOC108168203
56873	2.63	2.85	1.41	2.44	2.45	2.58	Lmbr1
18787	23.22	30.43	22.56	33.02	19.67	28.05	Serpine1
225341	0.09	0.06	0.09	0.03	0.12	0.06	Lims2
26446	432.99	443.58	727.71	416.2	436.47	439.76	Psmb3
70911	0.03	0.03	0	0	0.03	0.03	Phyhipl
18738	51.9	52.35	55.93	55.5	52.13	55.06	Pitpna
20907	3.4	4.17	3.25	3.3	4.27	3.1	Stx1a
20102	1633.85	1756.52	2759.62	1640.96	1565.99	1776.86	Rps4x
22693	0.36	0.36	0.36	0.35	0.35	0.28	Zfp30
27973	47.15	44.09	63.33	40.11	43.78	42.19	Vkorc1
21961	3.48	2.83	1.21	2.05	2.57	2.23	Tns1
14460	0.27	0.14	0.11	0.08	0.13	0.11	Gata1
216965	4.31	5.65	1.62	4.59	4.47	4.93	Taok1
231125	0.2	0.34	0.41	0.33	0.26	0.31	Zfyve28
233057	0.5	0.46	0.27	0.53	0.51	0.62	Zfp940
71923	8.35	8.97	10.41	7.38	9.26	9.06	Borcs6
58186	8.66	8.88	5.81	8.62	8.14	8.81	Rad18
100861753	0.3	0.22	0.09	0.18	0.09	0.12	Gm21188
236915	0.22	0.08	0.11	0.08	0.12	0.06	Arhgef9
18510	0.07	0.04	0	0.09	0	0.02	Pax8
60595	317.69	313.51	198.43	336.83	337.43	325.76	Actn4
20852	35.2	36.88	22.24	40.17	39.44	38.64	Stat6
56050	2.88	2.2	1.49	1.64	2.77	2.34	Cyp39a1
66714	10.89	10.36	13.27	9.17	9.65	9.59	4921524J17Rik
50762	56.72	51.76	59.91	50.26	55.74	52.86	Fbxo6
234214	62.27	63.03	33.9	67.26	67.02	69.08	Sorbs2
56213	241.62	233.71	213.92	249.35	258.51	249.06	Htra1
100756	11.32	11.99	8.93	12.76	12.5	11.48	Usp30
108167362	0.92	1.02	0.39	0.67	0.56	0.71	LOC108167362
23807	13.46	13.44	9.29	14.34	13.51	15.53	Arih2
76303	33.02	34.48	23.42	35.19	33.21	34.06	Osbp
241275	0.03	0	0	0	0	0	Noxa1
269344	0.54	0.42	0.6	0.33	0.44	0.38	Ell3
54208	107.34	105.68	112.1	108.44	111.33	119.69	Arl6ip1
226105	0.06	0.1	0.13	0.1	0.07	0.1	Cyp2c70
13544	14.23	12.44	4.8	12.7	14.15	12.49	Dvl3
73296	6.98	8.55	5.93	8.35	7.64	8.46	Rhobtb3
269470	12.36	15.63	11.63	16.55	12.25	16.41	Wdr3
108167576	0.2	0.4	0.37	0.23	0.23	0.2	LOC108167576
56386	6.53	6.4	3.54	7.04	6.78	6.75	B4galt6
68283	0.69	0.75	0.79	0.54	0.67	0.79	9530077C05Rik
257633	7.58	6.24	5.89	6.75	7.68	6.29	Acsf3
74570	2.41	2.39	1.58	2.38	2.15	2.45	Zkscan1
105651	2.77	3.15	0.76	2.81	2.72	2.6	Ppp1r3e
71059	2.07	1.34	0.78	1.54	2.22	1.01	Hexim2
20541	0.93	0.86	0.22	0.47	0.9	0.56	Slc8a1
18670	0.06	0.03	0.09	0.02	0.1	0.03	Abcb4
50498	0	0.13	0	0.13	0.06	0.06	Ebi3
74194	19.59	20.12	16.11	22.42	19.3	22.41	Rnd3
11668	40.16	40.31	38.41	29.8	35.48	32.84	Aldh1a1
16180	1.83	2.18	1.1	2.02	1.76	1.91	Il1rap
11739	184.87	200.35	257.87	173.64	170.6	179.76	Slc25a4
12702	44.38	40.23	30.62	36.83	44.68	40.1	Socs3
242297	0	0.1	0.04	0	0.05	0.13	Fam110b
394435	12.91	10.16	10.04	6.13	10.49	8.77	Ugt1a6b
320508	3.46	4.12	1.71	5.12	4.13	4.51	Cachd1
28035	59.88	65.12	49.29	65.34	57.91	66.11	Usp39
228765	0.07	0.19	0.29	0.04	0.18	0.15	Sdcbp2
99412	19.28	17.15	9.46	19.38	20.07	18.48	Golga2
12818	0.06	0.07	0.06	0.04	0.06	0.02	Col14a1
100502846	0.02	0	0.04	0	0	0.01	Gm19410
21877	133.98	125.76	132.91	119.61	141.2	122.97	Tk1
226922	0.23	0.27	0.2	0.22	0.11	0.15	Kcnq5
545253	0.02	0.11	0	0.02	0.02	0	Gm5820
56419	13.45	13.47	6.1	11.98	11.91	12.57	Diaph3
243510	1.46	1.26	0.55	1.16	1.3	0.76	Ccdc142
17925	17.23	16.69	9.92	17.11	16.01	16.34	Myo9b
13999	5.52	5.32	9.17	3.65	2.75	4.7	Gm14288
108168679	0	0.14	0.06	0	0	0	LOC108168679
403174	0.16	0.03	0.02	0.05	0.04	0.13	Msantd1
13823	0.01	0	0.03	0.03	0.01	0.01	Epb41l3
73883	0	0.04	0	0.04	0	0.04	4930431P22Rik
327956	0.08	0	0	0	0	0	Vmo1
30839	28.54	26.54	18.58	27.59	30.24	27.22	Fbxw5
78795	3.88	3.57	2.52	4.55	4.7	4.86	Armc9
30925	0.03	0.02	0.04	0.02	0.03	0.02	Slamf6
30933	20.81	18.79	19.27	21.21	20.41	20.08	Tor2a
66725	0.02	0.03	0.03	0.02	0.02	0.05	Lrrk2
74252	10.57	13.22	11.74	13.27	11.52	13.53	Armc1
216871	0	0.04	0	0	0	0	Gltpd2
26972	0	0.07	0	0	0	0	Spo11
19317	24	25.95	14.16	24.59	22.93	24.99	Qk
56448	0.94	0.85	0.44	0.79	1.11	0.64	Cyp2d22
77626	16.34	16.34	8.93	16.61	16.47	15.84	Smpd4
71777	6.16	6.51	5.88	6	6.32	7.04	Ing3
108077	20.04	18.16	12.44	18.88	20.9	18.37	Skiv2l
101056232	0	0	0	0	0.05	0.04	Gm29804
15375	0.08	0.16	0.08	0.11	0.08	0.16	Foxa1
276919	16.67	17.89	13.1	17.95	16.52	16.63	Gemin4
74766	16.95	13.9	22.93	13.41	15.66	13.93	Yipf2
53334	10.68	10.6	7.27	10.92	10.91	11.7	Gosr1
105351	7.61	8.55	7.64	7.79	6.78	8.45	AW209491
76795	17.01	15.23	8.36	15.81	18.25	15.43	Tbc1d9b
22388	98.93	102.4	88.82	111.02	101.66	103.22	Wdr1
215999	26.09	25.98	20.76	28.85	26.66	27.86	Mcu
208263	30.2	31.22	17.83	30.68	30.77	31.37	Tor1aip1
99375	21.14	22.94	15.79	22.16	21.4	23.31	Cul4a
217733	0	0.02	0	0.02	0.02	0.03	Tmem63c
245841	53.31	59.35	110.89	62.7	48.89	57.75	Polr2h
231841	9.12	8.44	6.28	8.57	8.88	8.26	Brat1
213211	40.43	37.95	27.08	39.76	41.06	36.79	Rnf26
17122	6.85	5.52	3.05	5.41	7.83	5.81	Mxd4
213326	9.67	10.18	4.95	11.63	9.81	10.82	Scyl2
56520	5.5	6.09	6.07	5.64	4.65	4.96	Nme4
68260	2.56	2.21	2.78	2.29	2.31	1.8	Trmt12
66928	30.45	30.89	54.67	27.16	34.9	31.43	Tmem261
432779	0.72	0.66	0.7	0.84	0.94	0.72	Lrrc14b
259279	11.17	11.98	7.7	11.97	9.61	11.55	Tubgcp3
84112	0	0	0	0	0.03	0	Sucnr1
21789	0	0.04	0.03	0	0	0	Tfpi2
20199	0	0.13	0	0	0	0	S100a5
217835	18.14	18.41	11.64	23.15	22.05	21.74	Rin3
210808	4.28	4.34	3.21	4.64	3.83	4.1	Lacc1
67733	9.16	8.91	11.89	7.52	9.82	11.49	Itgb3bp
22318	18.2	15.49	12.97	17.11	18.43	14.64	Vamp2
381693	0.02	0	0	0	0	0	Wdr95
212647	4.87	3.97	3.71	4.06	4.94	4.38	Aldh4a1
78910	0.01	0.1	0.01	0.07	0.06	0.08	Asb15
170459	9.15	10.42	8.34	11.03	10.44	10.87	Stard4
70984	6.16	5.64	4.03	4.56	5.23	5	4931406C07Rik
241694	4.67	4.88	1.72	5.33	5.16	5.12	Ralgapa2
333307	0	0.02	0	0.02	0	0	Trim75
67547	3.9	4.4	3.02	5.4	4.75	5.69	Slc39a8
102640673	1.91	1.73	1.47	1.85	1.36	1.68	LOC102640673
20204	0.05	0	0.04	0	0.05	0	Prrx2
545650	0.09	0	0.09	0	0	0	Gm13277
18356	0.03	0.03	0	0.08	0.03	0.03	Olfr56
69882	16.65	16.29	11.16	16.45	15.93	15.83	Vwa9
66931	0.04	0.09	0.11	0.08	0.09	0.17	1700010I14Rik
12727	8.62	8.47	6.37	7.47	7.78	7.54	Clcn4
347710	0.22	0.24	0.27	0.11	0	0.11	Pramel4
50849	161.3	154.64	113.62	149.6	156.89	150.43	Rnf10
54135	208.81	172.7	166.99	149.14	190.67	159.52	Lsr
69961	56.67	52.89	97.36	53.79	60.32	58.56	Rpp25l
50912	31.01	33.55	23.53	35.88	32.53	35.18	Exosc10
66689	0.68	0.79	0.62	0.75	0.9	0.51	Klhl28
192654	7.83	7.31	6.17	7.27	7.78	7.42	Pla2g15
19649	0.15	0.27	0.28	0.17	0.33	0.17	Robo3
72649	15.57	17.86	13.33	15.1	14.15	16.5	Tmem209
626832	0.54	1.08	0.58	0.45	0.59	0.69	Gm6710
108837	9.37	9.32	5.63	7.84	8.34	7.83	Ibtk
72179	0.3	0.4	0.26	0.34	0.52	0.45	Fbxl2
319742	1.48	1.23	0.83	2.02	0.96	1.11	Mpzl3
16495	0.03	0.03	0.01	0.03	0.04	0.03	Kcna7
233199	0.03	0	0.04	0	0	0.01	Mybpc2
104346	12.9	12.12	10.8	12.11	11.56	11.99	Gas8
229706	0.01	0.02	0	0	0	0.02	Slc6a17
93699	0.11	0.06	0	0.03	0	0	Pcdhgb1
268567	0.36	0.18	0.18	0.08	0.23	0.19	Tmem229b
116905	12.8	13.82	11.23	14.99	13.08	14.91	Dph1
56193	0	0	0	0.02	0	0.01	Plek
434172	0	0	0	0	0.02	0	Gm5592
16828	748.84	779.27	958.77	757.07	753.34	757.94	Ldha
194227	0	0	0.17	0	0	0	Gm13023
68799	3.66	3.95	3.25	4.04	4.19	3.21	Rgmb
12173	6.74	6.34	3.6	4.49	5.58	4.89	Bnc1
229672	0.07	0.08	0.07	0.08	0	0.08	Bcl2l15
14263	0.6	0.41	0.32	0.27	0.67	0.51	Fmo5
68490	24.17	18.33	23.13	16.41	24.03	17.43	Zfp579
170442	0.03	0	0.06	0	0.03	0	Bbox1
67464	1.02	1.14	3.95	1.22	3.22	2.48	Entpd4
72169	0	0	0.02	0	0	0.02	Trim29
20536	1.79	1.5	1.18	1.66	1.98	1.66	Slc4a3
59005	27.89	27.44	48.4	25.52	24.84	21.83	Trappc2l
243958	5.01	6.45	9.76	7.96	4.18	6.58	Siglecg
100169	34.85	33.45	16.23	38.98	38.04	35.01	Phactr4
327951	11.68	12.57	7.71	13.9	13.72	13.76	Cyb5d1
70568	6.27	6.56	2.92	5.93	6.26	6.4	Cpne3
26942	0.83	0.87	0.57	0.66	0.67	0.72	Spag1
15572	0	0	0	0.03	0.02	0	Elavl4
16331	0	0	0.03	0	0	0	Inpp5d
19934	155.95	161.81	348.62	144.27	142.09	153.66	Rpl22
15288	41.63	40.26	56.19	39.44	39.98	37.56	Hmbs
23970	126.74	121.56	71.28	130.16	138.74	133.44	Pacsin2
16768	0.28	0.18	0.35	0.18	0.23	0.1	Lag3
226591	18.02	19.13	23.45	19.96	18.41	21.72	Tiprl
76686	2.07	1.21	0.5	1.08	1.5	1.01	Clip3
67866	1.08	0.59	0.91	0.85	1.33	0.53	Wfdc1
14450	35.8	40.88	29.48	44.82	39.18	40.97	Gart
213043	0	0.01	0	0	0	0	Aox2
268933	6.89	5.74	4.26	6.5	7.18	7.06	Wdr24
12018	164.77	153.07	122.75	171.26	170.26	167.46	Bak1
11671	18.16	17.31	10.92	17.75	19.33	19.04	Aldh3a2
20257	0.05	0.03	0.16	0.03	0.05	0.08	Stmn2
54422	0	0	0.06	0	0.02	0	Barhl1
11865	7.45	7.21	5.12	6.6	6.59	6.88	Arntl
100504162	0	0	0	0	0	0.06	Prss51
66595	2.57	2.69	2.52	2.54	2.42	2.48	Aste1
228432	0.12	0.09	0.03	0.05	0.1	0.07	Ano3
216344	27.56	27.74	28.35	27.33	26.45	29.02	Rab21
106504	20.4	19.25	12.55	19.37	19.7	21.49	Stk38
15112	0	0	0	0.05	0	0.05	Hao1
66136	50.02	51.85	98.12	49.72	47.25	55.95	Znrd1
26876	0.04	0	0	0	0	0	Adh4
227327	3.32	2.62	1.89	2.36	2.05	1.91	B3gnt7
72368	23.93	21.99	22.59	22.29	25.38	23.36	Borcs8
244349	7.72	7.38	3.16	7	7.46	7.25	Kat6a
77721	37.87	39.16	38.34	48.93	41.71	45.38	Mrps5
14317	0.08	0.04	0.04	0.08	0.04	0.06	Ftcd
13115	0.11	0.06	0.04	0.11	0.06	0.1	Cyp27b1
19267	1.15	1.24	0.81	1.55	1.58	1.44	Ptpre
13088	0	0	0.03	0.03	0	0	Cyp2b10
17829	1.22	0.74	0.58	0.71	0.8	0.41	Muc1
100862115	0	0	0.03	0	0	0	LOC100862115
74365	2.14	2.38	1.85	2.52	2.1	2.41	Lonrf3
19013	0.04	0.04	0.03	0.05	0.08	0.07	Ppara
276770	2051.68	2121.9	2592.6	2218.74	2079.32	2150.07	Eif5a
67130	96	89.48	138.1	74.46	94.87	84.12	Ndufa6
381201	9.02	7.93	7.82	8.94	8.81	8.01	Ap5b1
56412	20.5	23.24	25.95	24.46	20.52	24.18	Noa1
100090	3.14	3.43	2.47	3.07	3.46	3.28	Zbtb48
80750	7.13	7.32	4.06	6.05	5.94	6.42	N4bp1
105245369	0.06	0.02	0	0.02	0.02	0.04	Gm40835
432870	0.02	0	0	0	0.07	0.02	Gm5464
66552	9.89	10.72	7.44	11.14	11.22	12.48	Sppl2a
69380	0	0	0	0	0.05	0	1700013G24Rik
59049	0.05	0.05	0.06	0.04	0.02	0.02	Slc22a17
229285	13.48	14.82	11.14	16.47	14.89	16.11	Spg20
98267	9.7	10.34	7.76	8.54	9.36	10.24	Stk17b
23830	7.57	8.13	6.99	8.09	8.45	7.63	Capn10
243967	0.04	0	0.07	0.03	0.14	0.04	Ntn5
72014	0.62	0.5	0.51	0.37	0.89	0.4	Btbd17
674842	0.09	0	0.27	0.04	0.04	0.16	Gm9631
68968	3.62	3.65	2.78	4.36	4.41	4.12	Cdan1
64660	85.67	79.15	148.84	79.32	90.28	77.82	Mrps24
107817	41.19	44.98	60.81	53.89	46.41	50.65	Jmjd6
68043	26.06	26.77	46.17	25.01	30.97	25.85	Eef1akmt1
12123	0	0	0.01	0.01	0.06	0.05	Hrk
11928	160.53	152.35	117.34	160.6	166.6	164.51	Atp1a1
74197	5.72	5.74	4.5	6.34	5.12	5.97	Gtf2e1
67236	21.75	23.95	29.44	24.46	21.86	24.63	Cinp
13123	0.02	0.02	0.05	0.02	0	0.02	Cyp7b1
18211	0	0.02	0.02	0.02	0.02	0.02	Ntrk1
78689	16.26	15.97	13.19	17.3	15.86	17.56	Naa35
18718	9.02	9.82	5.78	9.37	8.98	8.72	Pip4k2a
18746	1438.77	1387.4	1362.94	1400.4	1448.56	1404.81	Pkm
70999	20.81	20.65	17.45	21.14	19.76	20.88	Naa40
235582	0.24	0.42	0.15	0.26	0.3	0.25	Glyctk
15481	2219.59	2454.72	2261.08	2612.75	2210.38	2571.73	Hspa8
73910	11.87	11.22	7.91	11.87	12.52	12.34	Arhgap18
13872	19.47	19.49	15.86	19.78	20.09	20.7	Ercc3
66368	35.11	37.43	45.46	39.58	40.78	41.63	Rtca
22762	7.05	7.54	4.17	8.15	7	7.36	Zfpm2
16819	0.75	0.19	0.3	0.8	0.99	0.61	Lcn2
102209	27.93	25.68	33.15	25.79	27.76	25.59	Snapc2
19737	0.06	0.03	0.07	0.04	0.07	0.01	Rgs5
66119	253.55	223.32	434.5	220.63	232.6	224.55	Tomm6
20467	61.26	56.3	67.89	51.69	54.13	52.29	Sin3b
269585	0.69	0.81	0.42	0.85	0.78	0.92	Zscan20
27215	9.8	10.36	8.42	8.96	8.69	10.25	Azi2
545763	0	0	0	0	0.08	0	LOC545763
66056	19.82	16.3	17.78	15.01	17.76	15.66	Zfp524
76501	22.63	23.02	29.28	27.76	26.52	27.31	Commd9
20068	1061.85	1132.35	1851.42	974.07	986.28	985.65	Rps17
66805	0.04	0.12	0	0.08	0	0.04	Tspan1
68988	27.97	28.81	31.45	31.63	28.22	29.79	Prpf31
170732	0	0	0	0	0.04	0	Trhr2
22110	24.6	21.99	18.73	21.81	22.37	22.4	Tspyl1
107829	28.15	29.07	28.35	30.07	28.16	28.84	Thoc5
108167830	0.05	0.09	0	0.05	0	0	LOC108167830
66151	344.61	305.57	377.9	318.64	353.57	312.47	Prr13
100861702	0.1	0	0.14	0.1	0	0.13	Gm21149
12268	0.09	0.07	0.09	0.12	0.07	0.04	C4b
16403	17.2	17.05	9.57	18.96	16.57	17.63	Itga6
67515	14.33	13	14.4	14.35	15.08	16.36	Ttc33
56018	13.87	9.81	12.11	9.65	12.91	11.49	Stard10
72141	17.76	19.41	14.96	18.12	16.73	16.38	Adpgk
68279	0.6	1.21	0.77	0.72	0.61	0.59	Mcoln2
386612	15.38	14.93	20.26	16.06	14.86	15.51	Thoc6
72825	11.14	11.13	11.53	11.05	10.58	8.68	Mon1a
20616	0.11	0.12	0.04	0.09	0.2	0.21	Snap91
78834	8.35	7.95	6.58	7.37	8.15	8.36	Zfp623
78908	5.99	5.41	2.72	5.57	6	5.24	Igsf3
72008	15.26	13.84	14.73	15.23	16.33	14.98	Zfyve19
12453	63.68	55.4	49.12	55.22	61.39	54.69	Ccni
20210	3.6	2.17	4.26	3.27	2.04	1.32	Saa3
83408	0.02	0.1	0.09	0	0	0.02	Gimap3
73711	88.47	85.88	125.13	75.93	85.32	82.75	Mvb12a
319642	0.01	0	0	0	0	0	Rab9b
240119	0	0	0	0	0	0.01	St6gal2
71664	0	0.43	0.16	0.3	0.34	0.29	Mettl7b
18226	41.77	40.96	31.04	43.54	40.54	41.89	Nup62
19366	7.8	7.95	6.86	8.73	7.53	7.86	Rad54l
231872	79.18	88.2	98.76	90.99	76.79	88.73	Aimp2
117599	6.76	7.03	3.39	7.2	6.4	7.55	Helb
21331	0.09	0.15	0.15	0.05	0.16	0.05	T2
56305	46.95	50.33	38.5	54.95	47.06	50.81	Pitpnb
76108	14.61	14.15	10.94	14.17	13.08	13.96	Rap2a
74326	27.92	29.14	22.81	27.27	26.58	28.47	Hnrnpr
232984	0.32	0.14	0.34	0.33	0.31	0.35	B3gnt8
11434	0	0.02	0.03	0.01	0.04	0	Acr
218973	6.02	6.45	3.65	7	6.75	7.09	Wdhd1
633979	0	0	0	0	0	0.01	Ak9
77056	9.07	9.24	6.91	8.46	11.88	9.75	Tmco4
17116	0.04	0.04	0.02	0.02	0.07	0.02	Mab21l1
72736	21	21.56	22.15	21.01	18.21	23.88	Tmx1
102633420	0.02	0	0	0.02	0.02	0	Gm12223
20667	58.59	50.6	33.22	56.91	64.17	57.38	Sox12
108169061	0.46	0.28	0	0.5	0.71	0.17	LOC108169061
76223	1.94	1.17	1.79	0.9	1.58	1.34	Agbl3
64383	52.62	44.22	39.5	44.47	49.85	47.75	Sirt2
104010	1.08	1.15	1.15	1.15	1.19	1.41	Cdh22
71583	0.84	0.94	1.34	0.9	0.59	0.61	9130008F23Rik
12892	20.81	24.46	17.1	26.95	22.36	25.51	Cpox
50996	5.66	6.32	5.27	6.26	6.37	6.02	Pdcd7
72041	4.88	4.78	5.63	5.74	5.14	5.25	Alkbh4
77862	38.25	43.59	75.87	42.99	35.15	40.99	Thyn1
17968	0.01	0.06	0.01	0.01	0	0	Ncam2
243548	0	0	0	0.01	0	0	Prickle2
66834	40.29	39.09	56.3	30.86	33	35.37	Acot13
212980	4.15	4.33	2.79	3.32	2.98	3.39	Slc45a3
218850	0.78	0.82	0.54	0.92	1.02	1.06	Fam208a
12075	0.02	0.05	0	0.05	0.03	0.06	Bfsp1
229003	2.49	2.25	0.74	2.44	2.49	2.2	Helz2
16640	0.04	0	0	0	0	0	Klra9
67254	0.01	0	0	0	0	0	2900011O08Rik
22271	3.29	5.3	6.19	5.76	4.49	5.03	Upp1
[truncated: 14,282 more rows]

## Sheet: Figure 7-figure supplement 1C
Figure 7-figure supplement 1C
Gene Symbol	Type	Vector Expression	IL20RA Expression	O1 Expression	O2 Expression	O3 Expression	V1 Expression	V2 Expression	V3 Expression
Defb7	mRNA	1.043	7.28	2.05	1.7	2.09	0.45	0.71	1.97
Il18	mRNA	1.413	3.01	2.86	3.01	3.16	1.45	1.68	1.11
Oas1a	mRNA	0.377	2.93	3.33	2.07	3.39	0.47	0.3	0.36
Ccl17	mRNA	0.903	2.18	2.14	1.47	2.93	0.78	0.58	1.35
Lbp	mRNA	2.243	1.063	1.68	0.91	0.6	1.97	3.02	1.74
Masp1	mRNA	1.4	0.713	0.84	0.78	0.52	1.25	1.59	1.36
Hspa1b	mRNA	1.12	0.543	1.08	0.36	0.19	1.33	0.57	1.46
Cd59a	mRNA	0.187	0.53	0.65	0.49	0.45	0.24	0.24	0.08
Il33	mRNA	0.29	0.62	0.83	0.46	0.57	0.32	0.2	0.35
Cxcr2	mRNA	0.21	0.743	0.22	0.35	1.66	0.26	0.21	0.16
Oas1g	mRNA	0.037	0.267	0.29	0.33	0.18	0	0.07	0.04
Ccl27b	mRNA	0.053	0.39	0.98	0.19	0	0	0.16	0
Rapgef4	mRNA	0.157	0.373	0.09	0.22	0.81	0.12	0.08	0.27
Fcgr4	mRNA	0.137	0.443	0.5	0.46	0.37	0.11	0.19	0.11
Il12rb1	mRNA	0.15	0.41	0.41	0.58	0.24	0.18	0.2	0.07
Cd34	mRNA	0.29	0.013	0	0.02	0.02	0.29	0.28	0.3
Icosl	mRNA	0.173	0.047	0.02	0.05	0.07	0.12	0.26	0.14
Rnf125	mRNA	0.127	0.037	0.03	0.04	0.04	0.09	0.11	0.18
Cfb	mRNA	0.12	0.013	0	0	0.04	0.05	0.16	0.15
