# Supplementary material for: A systematic CRISPR screen reveals an IL-20/IL20RA-mediated immune crosstalk to prevent the ovarian cancer metastasis
Source: eLife. 2021 Jun 11;10:e66222. doi: 10.7554/eLife.66222 (PMC8195602; doi:10.7554/eLife.66222)
Supplement: Figure 8—source data 1. [file elife-66222-fig8-data1.xlsx]

## Sheet: Figure 8
Figure 8A
Vec	IL20RA	IL20RA/shIL-18
1.07474	2.51885	0.711207
1.0311	2.72863	0.570429
0.902388	2.85497	0.701187
Figure 8C
Vec	IL20RA	IL20RA/shIL18
7.9714	13.0871	5.8526
6.6007	19.4342	8.0604
6.724	11.4695	10.4305
7.6646	14.7861	8.7496
5.4031	18.1142	6.9659
5.5007	15.1644	8.2508
Figure 8F
Vec	IL20RA	IL20RA/shIL-18
10	0	8
9	1	10
7	2	9.5
8.5	1.5	3.5
6	2	12
8	4	9
Figure 8G
Diaphragm			Peritoneum			Mesentery
Vec	IL20RA	IL20RA/shIL-18	Vec	IL20RA	IL20RA/shIL-18	Vec	IL20RA	IL20RA/shIL-18
12	2	10	52	20	58	25	10	22
18	1	12	39	16	56	29	1	19
20	0	17	40	7	47	31	0	29
15	10	20	33	9	28	19	18	18
28	9	15	19	2	39	22	10	16
17	7	19	28	1	22	10	3	13
Figure 8H
Macrophages			M1-like			M2-like
Vec	IL20RA	IL20RA/shIL-18	Vec	IL20RA	IL20RA/shIL-18	Vec	IL20RA	IL20RA/shIL-18
15.5	39.5	17.8	33.4	84.3	48.9	5.37	0.36	4.06
18.8	29.2	16.8	51.6	78.8	59.5	3.14	0.54	4.33
38.2	27.3	27.5	65.3	83.6	72.9	1.71	0.13	1.63

## Sheet: Figure 8-figure supplement1
Figure 8-figure supplement1A
Vec	Vec/shIL20RB	IL20RA	IL20RA/shIL20RB
1.05576	0.167562	1.20349	0.195059
1.06609	0.171966	0.970028	0.156208
0.888466	0.200818	1.04416	0.225236
Figure 8-figure supplement1C
Raw 264.7 M1 markers
	Vec			Vec/shIL20RB			IL20RA			IL20RA/shIL20RB
NOS2	0.92094	0.980558	1.10738	1.17766	0.963655	1.31268	3.42921	3.23684	3.04296	1.25735	1.43422	1.22033
IFNAR1	1.06735	0.956678	0.979325	0.939374	0.974359	0.979551	2.48463	2.20319	2.56584	1.06991	1.00269	1.15481
CCR2	0.854662	1.04873	1.11569	0.95744	0.908444	0.943451	2.73914	2.87176	3.11612	1.18568	1.42856	1.26171
Ly6G/C	1.02101	0.943398	1.03819	0.914501	0.802319	1.13952	2.22135	1.5263	2.01852	1.20938	1.35295	1.10992
Raw 264.7 M2 markers
	Vec			Vec/shIL20RB			IL20RA			IL20RA/shIL20RB
Arg1	0.888465	1.018	1.10563	1.03137	1.08174	1.07224	0.496496	0.492173	0.476372	1.14029	1.08883	0.928265
IL10	0.837437	0.970502	1.23042	0.953072	1.07696	1.31211	0.339747	0.384852	0.420697	0.883297	0.929746	1.07976
CD163	1.0414	1.0073	0.953285	1.18965	1.02608	1.37551	0.525315	0.374743	0.368572	0.853933	0.990391	0.805663
CX3CR1	0.991583	1.06265	0.949035	1.219	1.08224	0.989167	0.485986	0.402626	0.428468	1.20482	1.04553	1.34037
Figure 8-figure supplement1F
Vec	IL20RA	IL20RA/shIL20RB
12	1	11
8.5	0.5	10.5
10	3	8
4.5	4	7
9	0.5	6.5
7.5	0	9
Figure 8-figure supplement1G
Diaphragm			Peritoneum			Mesentery
Vec	IL20RA	IL20RA/shIL20RB	Vec	IL20RA	IL20RA/shIL20RB	Vec	IL20RA	IL20RA/shIL20RB
25	2	22	40	19	55	50	8	40
18	0	23	48	14	48	38	1	35
17	5	18	39	10	41	39	0	39
22	6	7	45	12	37	18	9	34
16	4	16	48	0	39	21	10	16
8	0	16	59	1	27	25	3	22

## Sheet: Figure 8-figure supplement2
Figure 8-figure supplement 2A
	Ctrl			SK-OV-3
IL19	1.1924	0.758984	1.10495	0.893906	0.812701	0.935343
IL20	0.842806	1.07575	1.10296	2.81545	2.64541	2.14247
IL24	0.9867	1.1107	0.912472	2.10998	2.25818	2.17958
Figure 8-figure supplement 2B
Raw 264.7 M1 markers
	Ctrl			hIL-18
NOS2	0.92094	0.980558	1.10738	2.04528	2.032	2.07427
IFNAR1	0.993146	1.02834	0.979154	3.02031	2.57373	2.96931
CCR2	0.858797	1.01611	1.14596	1.81885	1.76247	1.60724
Ly6G/C	1.181	0.924	0.917	1.19626	1.95196	1.40024
Raw 264.7 M2 markers
	Ctrl			hIL-18
Arg1	0.903495	1.03973	1.06452	0.748786	0.73508	0.79885
IL10	0.895806	1.04588	1.06734	0.589584	0.499495	0.556554
CD163	0.917347	0.879577	1.23935	0.453589	0.438725	0.568136
CX3CR1	0.877772	0.918971	1.2397	0.607068	0.543723	0.479001
Figure 8-figure supplement 2C
Raw 264.7 M1 markers
	SK-OV-3 CM shCtrl			SK-OV-3 CM shIL20RA
NOS2	1.02381	1.01564	0.961699	0.77148	0.790533	0.804354
IFNAR1	0.85841	1.21463	0.959091	0.605254	0.692398	0.618866
CCR2	0.87879	0.996335	1.14211	0.669753	0.806581	0.738723
Ly6G/C	1.18545	1.14591	0.736155	0.865275	0.802229	0.833813
Raw 264.7 M2 markers
	SK-OV-3 CM shCtrl			SK-OV-3 CM shIL20RA
Arg1	1.02292	0.992566	0.984919	1.57905	1.65652	1.61635
IL10	0.947328	1.02683	1.02802	1.75133	1.65801	1.74541
CD163	1.10735	0.782967	1.15338	1.41862	1.38129	1.58855
CX3CR1	0.998526	0.747665	1.33947	1.55842	1.73503	1.52957
