# Supplementary material for: A systematic CRISPR screen reveals an IL-20/IL20RA-mediated immune crosstalk to prevent the ovarian cancer metastasis
Source: eLife. 2021 Jun 11;10:e66222. doi: 10.7554/eLife.66222 (PMC8195602; doi:10.7554/eLife.66222)
Supplement: Figure 9—source data 1. [file elife-66222-fig9-data1.xlsx]

## Sheet: Figure 8
Figure 8C
Diaphragm		Peritoneum		Mesentery
PBS	IL-18	PBS	IL-18	PBS	IL-18
9	0	50	20	49	13
10	1	43	17	47	12
10	2	37	10	37	11
12	2	32	9	29	9
15	3	30	8	27	9
18	5	29	0	26	8
20	5	33	0	18	10
Figure 8E
PBS	IL-18
6.5	0
8	0
10	0.5
10.5	3
11	2.5
12	1.5
13	1.5
Figure 8F
Macrophages		M1-like		M2-like
PBS	IL-18	PBS	IL-18	PBS	IL-18
35	47.7	47.7	73.3	0.59	0.4
50.1	29.3	29.3	74.3	0.47	0.28
33.7	36.5	36.5	77.6	2.49	0.15
24	47.9	47.9	76.3	2.55	0.21
18.8	34.9	34.9	63.4	2.63	0.71
